# Supplementary material
Source: ML conference proceedings conference paper supplement (https://openreview.net/forum?id=6MQ5cheYDZ)
Supplement: supplementary_material [file attachment]

---

# Decision-Aware Actor-Critic with Function Approximation and Theoretical Guarantees

---

Anonymous Author(s)

Affiliation

Address

email

## Abstract

1 Actor-critic (AC) methods are widely used in reinforcement learning (RL), and  
2 benefit from the flexibility of using any policy gradient method as the actor and  
3 value-based method as the critic. The critic is usually trained by minimizing the TD  
4 error, an objective that is potentially decorrelated with the true goal of achieving a  
5 high reward with the actor. We address this mismatch by designing a joint objective  
6 for training the actor and critic in a *decision-aware* fashion. We use the proposed  
7 objective to design a generic, AC algorithm that can easily handle any function  
8 approximation. We explicitly characterize the conditions under which the resulting  
9 algorithm guarantees monotonic policy improvement, regardless of the choice of  
10 the policy and critic parameterization. Instantiating the generic algorithm results  
11 in an actor that involves maximizing a sequence of surrogate functions (similar to  
12 TRPO, PPO), and a critic that involves minimizing a closely connected objective.  
13 Using simple bandit examples, we provably establish the benefit of the proposed  
14 critic objective over the standard squared error. Finally, we empirically demonstrate  
15 the benefit of our decision-aware actor-critic framework on simple RL problems.

## 1 Introduction

17 Reinforcement learning (RL) is a framework for solving problems involving sequential decision-  
18 making under uncertainty, and has found applications in games [37, 49], robot manipulation tasks [54,  
19 63] and clinical trials [44]. RL algorithms aim to learn a policy that maximizes the long-term return by  
20 interacting with the environment. Policy gradient (PG) methods [58, 53, 28, 24, 46] are an important  
21 class of algorithms that can easily handle function approximation and structured state-action spaces,  
22 making them widely used in practice. PG methods assume a differentiable parameterization of the  
23 policy and directly optimize the return with respect to the policy parameters. Typically, a policy’s  
24 return is estimated by using Monte-Carlo samples obtained via environment interactions [58]. Since  
25 the environment is stochastic, this approach results in high variance in the estimated return, leading  
26 to higher sample-complexity (number of environment interactions required to learn a good policy).  
27 Actor-critic (AC) methods [28, 42, 5] alleviate this issue by using value-based approaches [51, 57] in  
28 conjunction with PG methods, and have been empirically successful [19, 22]. In AC algorithms, a  
29 value-based method (“critic”) is used to approximate a policy’s estimated value, and a PG method  
30 (“actor”) uses this estimate to improve the policy towards obtaining higher returns.

31 Though AC methods have the flexibility of using any method to independently train the actor and  
32 critic, it is unclear how to train the two components *jointly* in order to learn good policies. For  
33 example, the critic is typically trained via temporal difference (TD) learning and its objective is  
34 to minimize the value estimation error across all states and actions. For large real-world Markov  
35 decision processes (MDPs), it is intractable to estimate the values across all states and actions, and  
36 algorithms resort to function approximation schemes. In this setting, the critic should focus its limited  
37 model capacity to correctly estimate the state-action values that have the largest impact on improving  
38 the actor’s policy. This idea of explicitly training each component of the RL system to help the

agent take actions that result in higher returns is referred to as *decision-aware RL*. Decision-aware RL [17, 16, 1, 10, 13, 14, 31] has mainly focused on model-based approaches that aim to learn a model of the environment, for example, the rewards and transition dynamics in an MDP. In this setting, decision-aware RL aims to model relevant parts of the world that are important for inferring a good policy. This is achieved by (i) designing objectives that are aware of the current policy [1, 14] or its value [17, 16], (ii) differentiating through the transition dynamics to learn models that result in good action-value functions [13] or (iii) simultaneously learning value functions and models that are consistent [50, 39, 34]. In the model-free setting, decision-aware RL aims to train the actor and critic cooperatively in order to optimize the same objective that results in near-optimal policies. In particular, Dai et al. [10] use the linear programming formulation of MDPs and define a joint saddle-point objective (minimization w.r.t. the critic and maximization w.r.t. the actor). The use of function approximation makes the resulting optimization problem non-convex non-concave leading to training instabilities and necessitating the use of heuristics. Recently, Dong et al. [11] used stochastic gradient descent-ascent to optimize this saddle-point objective and, under certain assumptions on the problem, proved that the resulting policy converges to a stationary point of the value function. Similar to Dong et al. [11], we study a decision-aware AC method with function approximation and equipped with theoretical guarantees on its performance. In particular, we make the following contributions.

**Joint objective for training the actor and critic:** Following Vaswani et al. [56], we distinguish between a policy’s *functional representation* (sufficient statistics that define a policy) and its *parameterization* (the specific model used to realize these sufficient statistics in practice). For example, a policy can be represented by its state-action occupancy measure, and we can use a neural network parameterization to model this measure in practice (refer to Sec. 2 for more examples). In Sec. 3.2, we exploit a smoothness property of the return and design a lower-bound (Prop. 1) on the return of an arbitrary policy. Importantly, the lower bound depends on both the actor and critic, and immediately implies a joint objective for training the two components (minimization w.r.t the critic and maximization w.r.t the actor). Unlike Dai et al. [10], Dong et al. [11], the proposed objective works for **any** policy representation – the policy could be represented as conditional distributions over actions for each state or a deterministic mapping from states to actions [20]. Another advantage of working in the functional space is that our lower bound does not depend on the parameterization of either the actor or the critic. Moreover, unlike Dai et al. [10], Dong et al. [11], our framework does not need to model the distribution over states, and hence results in a more efficient algorithm. We note that our framework can be used for other applications where gradient computation is expensive or has large variance [38], and hence requires a model of the gradient (e.g., variational inference).

**Generic actor-critic algorithm:** In Sec. 3.2, we use our joint objective to design a generic decision-aware AC algorithm. The resulting algorithm (Algorithm 1) can be instantiated with any functional representation of the policy, and can handle any policy or critic parameterization. Similar to Vaswani et al. [56], the actor update involves optimizing a *surrogate function* that depends on the current policy, and consequently supports *off-policy updates*, i.e. similar to common PG methods such as TRPO [45], PPO [47], the algorithm can update the policy without requiring additional interactions with the environment. This property coupled with the use of a critic makes the resulting algorithm sample-efficient in practice. In contrast with TRPO/PPO, both the off-policy actor updates and critic updates in Algorithm 1 are designed to maximize the same lower bound on the policy return.

**Theoretical guarantees:** In Sec. 4.1, we analyze the necessary and sufficient conditions in order to guarantee monotonic policy improvement, and hence convergence to a stationary point. We emphasize that these improvement guarantees hold regardless of the policy parameterization and the quality of the critic (up to a certain threshold that we explicitly characterize). This is in contrast to existing theoretical results that focus on the tabular or linear function approximation settings or rely on highly expressive critics to minimize the critic error and achieve good performance for the actor. By exploiting the connection to inexact mirror descent (MD), we prove that Algorithm 1 is guaranteed to converge to the neighbourhood of a stationary point where the neighbourhood term depends on the decision-aware critic loss (Sec. 4.2). Along the way, we improve the theoretical guarantees for MD on general smooth, non-convex functions [15, 12]. As an additional contribution, we demonstrate a way to use the framework of Vaswani et al. [56] to “lift” the existing convergence rates [60, 36, 23] for the tabular setting to use off-policy updates and function approximation (Appendix D.2 and D.3). This gives rise to a simple, black-box proof technique that might be of independent interest.

**Instantiating the general AC framework:** We instantiate the framework for two policy representations – in Sec. 5.1, we represent the policy by the set of conditional distributions over actions (“direct”

representation), whereas in Sec. 5.2, we represent the policy by using the logits corresponding to a softmax representation of these conditional distributions (“softmax” representation). In both cases, we instantiate the generic lower-bound (Propositions 4, 6), completely specifying the actor and critic objectives in Algorithm 1. Importantly, unlike the standard critic objective that depends on the squared difference of the value functions, the proposed decision-aware critic loss (i) depends on the policy representation – it involves the state-action value functions for the direct representation and depends on the advantage functions for the softmax representation, and (ii) penalizes the under-estimation and over-estimation of these quantities in an asymmetric manner. For both representations, we consider simple bandit examples (Propositions 5, 7) which show that minimizing the decision-aware critic loss results in convergence to the optimal policy, whereas minimizing variants of the squared loss do not. In App. B, we consider a third policy representation involving stochastic value gradients [20] for continuous control, and instantiate our decision-aware actor-critic framework in this case.

**Experimental evaluation:** Finally, in Sec. 6, we consider simple RL environments and benchmark Algorithm 1 for both the direct and softmax representations with a linear policy and critic parameterization. We compare the actor performance when using the squared critic loss vs the proposed critic loss, and demonstrate the empirical benefit of our decision-aware actor-critic framework.

## 2 Problem Formulation

We consider an infinite-horizon discounted Markov decision process (MDP) [43] defined by the tuple  $\langle \mathcal{S}, \mathcal{A}, \mathcal{P}, r, \rho, \gamma \rangle$  where  $\mathcal{S}$  is the set of states,  $\mathcal{A}$  is the action set,  $\mathcal{P} : \mathcal{S} \times \mathcal{A} \rightarrow \Delta_{\mathcal{S}}$  is the transition probability function,  $\rho \in \Delta_{\mathcal{S}}$  is the initial distribution of states,  $r : \mathcal{S} \times \mathcal{A} \rightarrow [0, 1]$  is the reward function and  $\gamma \in [0, 1]$  is the discount factor. For each state  $s \in \mathcal{S}$ , a policy  $\pi$  induces a distribution  $p^{\pi}(\cdot|s)$  over actions. It also induces a measure  $d^{\pi}$  over states such that  $d^{\pi}(s) = \sum_{\tau=0}^{\infty} \gamma^{\tau} \mathcal{P}(s_{\tau} = s | s_0 \sim \rho, a_{\tau} \sim p^{\pi}(\cdot|s_{\tau}))$ . Similarly, we define  $\mu^{\pi}$  as the measure over state-action pairs induced by policy  $\pi$ , implying that  $\mu^{\pi}(s, a) = d^{\pi}(s) p^{\pi}(a|s)$  and  $d^{\pi}(s) = \sum_a \mu^{\pi}(s, a)$ . The *action-value function* corresponding to policy  $\pi$  is denoted by  $Q^{\pi} : \mathcal{S} \times \mathcal{A} \rightarrow \mathbb{R}$  such that  $Q^{\pi}(s, a) := \mathbb{E}[\sum_{\tau=0}^{\infty} \gamma^{\tau} r(s_{\tau}, a_{\tau})]$  where  $s_0 = s, a_0 = a$  and for  $\tau \geq 0$ ,  $s_{\tau+1} \sim \mathcal{P}(\cdot|s_{\tau}, a_{\tau})$  and  $a_{\tau+1} \sim p^{\pi}(\cdot|s_{\tau+1})$ . The *value function* of a stationary policy  $\pi$  for the start state equal to  $s$  is defined as  $J_s(\pi) := \mathbb{E}_{a \sim p^{\pi}(\cdot|s)}[Q^{\pi}(s, a)]$  and we define  $J(\pi) := \mathbb{E}_{s \sim \rho} J_s(\pi)$ . For a state-action pair  $(s, a)$ , the *advantage function* corresponding to policy  $\pi$  is given by  $A^{\pi}(s, a) := Q^{\pi}(s, a) - J_s(\pi)$ . Given a set of feasible policies  $\Pi$ , the objective is to compute the policy that maximizes  $J(\pi)$ .

**Functional representation vs Policy Parameterization:** Similar to the policy optimization framework in Vaswani et al. [56], we differentiate between a policy’s functional representation and its parameterization. The *functional representation* of a policy  $\pi$  defines its sufficient statistics, for example, we may represent a policy via the set of distributions  $p^{\pi}(\cdot|s) \in \Delta_{\mathcal{A}}$  for each state  $s \in \mathcal{S}$ . We will refer to this as the *direct representation*. The same policy can have multiple functional representations, for example, since  $p^{\pi}(\cdot|s)$  is a probability distribution, one can write  $p^{\pi}(a|s) = \exp(z^{\pi}(s, a)) / \sum_{a'} \exp(z^{\pi}(s, a'))$ , and represent  $\pi$  by the set of logits  $z^{\pi}(s, a)$  for each  $(s, a)$  pair. We will refer to this as the *softmax representation*. On the other hand, the *policy parameterization* is determined by a *model* (with parameters  $\theta$ ) that realizes these statistics. For example, we could use a neural-network to parameterize the logits corresponding to the policy’s softmax representation, rewriting  $z^{\pi}(s, a) = z^{\pi}(s, a|\theta)$  where the model is implicit in the  $z^{\pi}(s, a|\theta)$  notation. As another example, the *tabular parameterization* corresponds to having a parameter for each state-action pair [60, 36]. The policy parameterization thus defines the set  $\Pi$  of realizable policies that can be expressed with the parametric model at hand. It is important to note that the policy parameterization can be chosen independently of its functional representation. In the next section, we recap the functional mirror ascent framework [56] and generalize it to the actor-critic setting.

## 3 Methodology

We describe functional mirror ascent in Sec. 3.1, and use it to design a general decision-aware actor-critic framework and corresponding algorithm in Sec. 3.2.

### 3.1 Functional Mirror Ascent for Policy Gradient (FMAPG) framework

For a given functional representation, Vaswani et al. [56] update the policy by *functional mirror ascent* and project the updated policy onto the set  $\Pi$  determined by the policy parameterization. Functional mirror ascent is an iterative algorithm whose update at iteration  $t \in \{0, 1, \dots, T-1\}$  is

given as:  $\pi_{t+1} = \arg \max_{\pi \in \Pi} \left[ \langle \pi, \nabla_{\pi} J(\pi_t) \rangle - \frac{1}{\eta} D_{\Phi}(\pi, \pi_t) \right]$  where  $\pi_t$  is the policy (expressed as its functional representation) at iteration  $t$ ,  $\eta$  is the step-size in the functional space and  $D_{\Phi}$  is the Bregman divergence (induced by the mirror map  $\Phi$ ) between the representation of policies  $\pi$  and  $\pi_t$ . The FMAPG framework casts the projection step onto  $\Pi$  as an unconstrained optimization w.r.t the parameters  $\theta \in \mathbb{R}^n$  of a *surrogate function*:  $\theta_{t+1} = \arg \max \ell_t(\theta) := \langle \pi(\theta), \nabla_{\pi} J(\pi(\theta_t)) \rangle - \frac{1}{\eta} D_{\Phi}(\pi(\theta), \pi(\theta_t))$ . Here,  $\pi(\theta)$  refers to the parametric form of the policy where the choice of the parametric model is implicit in the  $\pi(\theta)$  notation. The policy at iteration  $t$  is thus expressed as  $\pi(\theta_t)$ , whereas the updated policy is given by  $\pi_{t+1} = \pi(\theta_{t+1})$ . The surrogate function is non-concave in general and can be approximately maximized using a gradient-based method, resulting in a nested loop algorithm. Importantly, the inner-loop (optimization of  $\ell_t(\theta)$ ) updates the policy parameters (and hence the policy), but does not involve recomputing  $\nabla_{\pi} J(\pi)$ . Consequently, these policy updates do not require interacting with the environment and are thus *off-policy*. This is a desirable trait for designing sample-efficient PG algorithms and is shared by methods such as TRPO [45] and PPO [47].

With the appropriate choice of  $\Phi$  and  $\eta$ , the FMAPG framework guarantees monotonic policy improvement for any number of inner-loops and policy parameterization. A shortcoming of this framework is that it requires access to the exact gradient  $\nabla_{\pi} J(\pi)$ . When using the direct or softmax representations, computing  $\nabla_{\pi} J(\pi)$  involves computing either the action-value  $Q^{\pi}$  or the advantage  $A^{\pi}$  function respectively. In complex real-world environments where the rewards and/or the transition dynamics are unknown, these quantities can only be estimated. For example,  $Q^{\pi}$  can be estimated using Monte-Carlo sampling by rolling out trajectories using policy  $\pi$  resulting in large variance, and consequently higher sample complexity. Moreover, for large MDPs, function approximation is typically used to estimate the  $Q$  function, and the resulting aliasing makes it impossible to compute it exactly in practice. This makes the FMAPG framework impractical in real-world scenarios. Next, we generalize FMAPG to handle inexact gradients and subsequently design an actor-critic framework.

### 3.2 Generalizing FMAPG to Actor-Critic

In order to generalize the FMAPG framework, we first prove the following proposition in App. C.

**Proposition 1.** *For any policy representations  $\pi$  and  $\pi'$ , any strictly convex mirror map  $\Phi$ , and any gradient estimator  $\hat{g}$ , for  $c > 0$  and  $\eta$  such that  $J + \frac{1}{\eta} \Phi$  is convex in  $\pi$ ,*

$$J(\pi) \geq J(\pi') + \langle \hat{g}(\pi'), \pi - \pi' \rangle - \left( \frac{1}{\eta} + \frac{1}{c} \right) D_{\Phi}(\pi, \pi') - \frac{1}{c} D_{\Phi^*} \left( \nabla \Phi(\pi') - c[\nabla J(\pi') - \hat{g}(\pi')], \nabla \Phi(\pi') \right)$$

where  $\Phi^*$  is the Fenchel conjugate of  $\Phi$  and  $D_{\Phi^*}$  is the Bregman divergence induced by  $\Phi^*$ .

The above proposition is a statement about the relative smoothness [33] of  $J$  (w.r.t  $D_{\Phi}$ ) in the functional space. Here, the **brown** term is the linearization of  $J$  around  $\pi'$ , but involves  $\hat{g}(\pi')$  which can be **any** estimate of the gradient at  $\pi'$ . The **red** term quantifies the distance between the representations of policies  $\pi$  and  $\pi'$  in terms of  $D_{\Phi}(\pi, \pi')$ , whereas the **blue** term characterizes the penalty for an inaccurate estimate of  $\nabla_{\pi} J(\pi')$  and depends on  $\Phi$ . We emphasize that Prop. 1 can be used for **any** continuous optimization problem that requires a model of the gradient, e.g., in variational inference which uses an approximate posterior in lieu of the true one.

For policy optimization with FMAPG,  $\nabla_{\pi} J(\pi)$  involves the action-value or advantage function for the direct or softmax functional representations respectively (see Sec. 5 for details), and the gradient estimation error is equal to the error in these functions. Since these quantities are estimated by the critic, we refer to the **blue** term as the *critic error*. In order to use Prop. 1, at iteration  $t$  of FMAPG, we set  $\pi' = \pi_t$  and include the policy parameterization, resulting in **inequality (I)**:  $J(\pi) - J(\pi_t) \geq$

$\langle \hat{g}_t, \pi(\theta) - \pi_t \rangle - \left( \frac{1}{\eta} + \frac{1}{c} \right) D_{\Phi}(\pi(\theta), \pi_t) - \frac{1}{c} D_{\Phi^*} \left( \nabla \Phi(\pi_t) - c[\nabla J(\pi_t) - \hat{g}_t], \nabla \Phi(\pi_t) \right)$ , where  $\hat{g}_t := \hat{g}(\pi_t)$ . We see that in order to obtain a policy  $\pi$  that maximizes the policy improvement  $J(\pi) - J(\pi_t)$  and hence the LHS, we should maximize the RHS i.e. (i) learn  $\hat{g}_t$  to minimize the **blue** term (equal to the critic objective) and (ii) compute  $\pi \in \Pi$  that maximizes the **green** term (equal to the functional mirror ascent update at iteration  $t$ ). Using a second-order Taylor series expansion of  $D_{\Phi^*}$  (Prop. 20), we see that as  $c$  decreases, the critic error decreases, whereas the  $\left( \frac{1}{\eta} + \frac{1}{c} \right) D_{\Phi}(\pi, \pi_t)$  term increases. Consequently, we interpret the scalar  $c$  as a trade-off parameter that relates the critic error to the permissible movement in the functional mirror ascent update. Hence, *both the actor and critic objectives are coupled through Prop. 1 and both components of the RL system should be*

---

**Algorithm 1:** Generic actor-critic algorithm

---

```

1 Input:  $\pi$  (choice of functional representation),  $\theta_0$  (initial policy parameters),  $\omega_{(-1)}$  (initial critic
   parameters),  $T$  (AC iterations),  $m_a$  (actor inner-loops),  $m_c$  (critic inner-loops),  $\eta$  (functional step-size for
   actor),  $c$  (trade-off parameter),  $\alpha_a$  (parametric step-size for actor),  $\alpha_c$  (parametric step-size for critic)
2 Initialization:  $\pi_0 = \pi(\theta_0)$ 
3 for  $t \leftarrow 0$  to  $T - 1$  do
4   Estimate  $\widehat{\nabla}_{\pi} J(\pi_t)$  and form  $\mathcal{L}_t(\omega) := \frac{1}{c} D_{\Phi^*} \left( \nabla \Phi(\pi_t) - c [\widehat{\nabla}_{\pi} J(\pi_t) - \hat{g}_t(\omega)], \nabla \Phi(\pi_t) \right)$ 
5   Initialize inner-loop:  $v_0 = \omega_{t-1}$ 
6   for  $k \leftarrow 0$  to  $m_c - 1$  do
7      $v_{k+1} = v_k - \alpha_c \nabla_v \mathcal{L}_t(v_k) / *$  Critic Updates  $*/$ 
8      $\omega_t = v_{m_c} \quad ; \quad \hat{g}_t = \hat{g}_t(\omega_t)$ 
9     Form  $\ell_t(\theta) := \langle \hat{g}_t, \pi(\theta) - \pi_t \rangle - \left( \frac{1}{\eta} + \frac{1}{c} \right) D_{\Phi}(\pi(\theta), \pi_t)$ 
10    Initialize inner-loop:  $\nu_0 = \theta_t$ 
11    for  $k \leftarrow 0$  to  $m_a - 1$  do
12       $\nu_{k+1} = \nu_k + \alpha_a \nabla_{\nu} \ell_t(\nu_k) / *$  Off-policy actor updates  $*/$ 
13       $\theta_{t+1} = \nu_{m_a} \quad ; \quad \pi_{t+1} = \pi(\theta_{t+1})$ 
14 Return  $\pi_T = \pi(\theta_T)$ 

```

---

199 *trained cooperatively in order to maximize policy improvement.* We refer to the resulting framework  
200 as *decision-aware actor-critic* and present its pseudo-code in Algorithm 1.

201 At iteration  $t$  of Algorithm 1,  $\hat{g}_t$  (the gradient estimate at  $\pi_t$ ) is parameterized by  $\omega$  and similar to the  
202 policy, the parametric model for the critic is implicit in the  $\hat{g}_t(\omega)$  notation. Given the choice of the  
203 functional representation, the algorithm first estimates  $\widehat{\nabla}_{\pi} J(\pi_t)$ <sup>1</sup> in order to train the critic (Line 4).  
204 Given this estimate, the critic is trained to minimize  $\mathcal{L}_t(\omega)$  and form  $\hat{g}_t$  (Lines 5-8). Line 9 forms the  
205 surrogate function for the actor and depends on the policy parameterization. The inner-loop (Lines  
206 10 - 13) involves maximizing the surrogate w.r.t  $\theta$  and corresponds to off-policy updates. In the next  
207 section, we establish theoretical guarantees on the performance of Algorithm 1.

## 208 4 Theoretical Guarantees

209 We first establish the necessary and sufficient conditions to guarantee monotonic policy improvement  
210 in the presence of critic error (Sec. 4.1). In Sec. 4.2, we prove that Algorithm 1 is guaranteed to  
211 converge to the neighbourhood (that depends on the critic error) of a stationary point.

### 212 4.1 Conditions for monotonic policy improvement

213 According to **inequality (I)**, to guarantee monotonic policy improvement at iteration  $t$ , one must find  
214 a  $(\theta, c)$  pair to guarantee that the RHS of **(I)** is positive. In the proposition below (proved in App. D),  
215 we derive the conditions on the critic error to ensure that it possible to find such an  $(\theta, c)$  pair.

216 **Proposition 2.** *For any policy representation and any policy or critic parameterization, there exists*  
217 *a  $(\theta, c)$  pair that makes the RHS of **inequality (I)** strictly positive, and hence guarantees monotonic*  
218 *policy improvement ( $J(\pi_{t+1}) > J(\pi_t)$ ), if and only if*

$$\langle b_t, \tilde{H}_t^\dagger b_t \rangle > \langle [\nabla J(\pi_t) - \hat{g}_t], \nabla^2 \Phi^*(\nabla \Phi(\pi_t)) [\nabla J(\pi_t) - \hat{g}_t] \rangle,$$

219 *where  $b_t \in \mathbb{R}^n := \sum_{s \in \mathcal{S}} \sum_{a \in \mathcal{A}} [\hat{g}_t]_{s,a} \nabla_{\theta} [\pi(\theta_t)]_{s,a}$  and  $\tilde{H}_t \in \mathbb{R}^{n \times n} :=$*   
220  *$\nabla_{\theta} \pi(\theta_t)^\top \nabla_{\pi}^2 \Phi(\pi_t) \nabla_{\theta} \pi(\theta_t)$ . For the special case of the tabular policy parameterization,*  
221 *the above condition becomes equal to,*

$$\langle \hat{g}_t, [\nabla_{\pi}^2 \Phi(\pi_t)]^{-1} \hat{g}_t \rangle > \langle [\nabla J(\pi_t) - \hat{g}_t], \nabla^2 \Phi^*(\nabla \Phi(\pi_t)) [\nabla J(\pi_t) - \hat{g}_t] \rangle.$$

222 For the Euclidean mirror map with the tabular policy parameterization, the above condition becomes  
223 equal to  $\|\hat{g}_t\|_2^2 > \|\nabla J(\pi_t) - \hat{g}_t\|_2^2$  meaning that the relative error in estimating  $\nabla J(\pi_t)$  needs to be  
224 less than 1. For a general mirror map, the relative error is measured in a different norm induced by  
225 the mirror map. The above improvement guarantee holds regardless of the policy representation and  
226 parameterization of the policy or critic. This is in contrast to existing theoretical results [40, 27, 18]  
227 that focus on either the tabular or linear function approximation setting for the policy and/or critic, or  
228 rely on using expressive models to minimize the critic error and achieve good performance for the

---

<sup>1</sup>The corresponding (action-) value functions can be estimated using Monte-Carlo rollouts or bootstrapping.



actor. The above proposition also quantifies the scenario when the critic error is too large to guarantee policy improvement. In this case, the algorithm should either improve the critic by better optimization or by using a more expressive model, or resort to using high variance Monte-Carlo samples as in REINFORCE [58]. Finally, we see that the impact of a smaller function class for the actor is a potentially lower value for  $\langle b_t, \tilde{H}_t^\dagger b_t \rangle$ , making it more difficult to satisfy the above condition.

## 4.2 Convergence of Algorithm 1

We now analyze the convergence of Algorithm 1 for an arbitrary critic error. Define  $\bar{\theta}_{t+1} := \arg \max_{\theta} \ell_t(\theta)$ ,  $\bar{\pi}_{t+1} = \pi(\bar{\theta}_{t+1}) = \arg \max_{\pi \in \Pi} \left\{ \langle \hat{g}_t, \pi - \pi_t \rangle - \left( \frac{1}{\eta} + \frac{1}{c} \right) D_{\Phi}(\pi, \pi_t) \right\}$ . Note that  $\bar{\pi}_{t+1}$  is the iterate obtained by using the inexact mirror ascent (MA) update [7] starting from  $\pi_t$ , and that the inner-loop (Lines 10-13) of Algorithm 1 approximates this update. This connection allows us to prove the following guarantee (see App. D.1 for details) for Algorithm 1.

**Proposition 3.** *For any policy representation and mirror map  $\Phi$  such that (i)  $J + \frac{1}{\eta} \Phi$  is convex in  $\pi$ , any policy parameterization such that (ii)  $\ell_t(\theta)$  is smooth w.r.t  $\theta$  and satisfies the Polyak-Lojasiewicz (PL) condition, for  $c > 0$ , after  $T$  iterations of Algorithm 1 we have that,*

$$\mathbb{E} \left[ \frac{D_{\Phi}(\bar{\pi}_{T+1}, \pi_{\mathcal{R}})}{\zeta^2} \right] \leq \frac{1}{\zeta T} \left[ J(\pi^*) - J(\pi_0) + \sum_{t=0}^{T-1} \left( \frac{1}{c} \mathbb{E} D_{\Phi^*} \left( \nabla \Phi(\pi_t) - c \delta_t, \nabla \Phi(\pi_t) \right) + \mathbb{E}[e_t] \right) \right]$$

where  $\delta_t := \nabla J(\pi_t) - \hat{g}_t$ ,  $\frac{1}{\zeta} = \frac{1}{\eta} + \frac{1}{c}$ ,  $\mathcal{R}$  is a random variable chosen uniformly from  $\{0, 1, 2, \dots, T-1\}$  and  $e_t \in \mathcal{O}(\exp(-m_a))$  is the approximation error at iteration  $t$ .

It is possible to find  $\eta$  such that Assumption (i) is satisfied for both the direct and softmax representations (see Sec. 5). Assumption (ii) is satisfied when using a linear and in some cases, a neural network policy parameterization [32]. We note that the measure of sub-optimality in the above proposition is similar to the one used in the analysis of stochastic mirror descent [64]. It recovers the standard  $\mathbb{E} \|\nabla J(\pi_t)\|_2^2$  characterization of the stationary point for the Euclidean mirror map. The first term on the RHS is the initial sub-optimality that decreases at an  $O(1/T)$  rate, whereas the second term is equal to the critic error and can be decomposed into variance and bias terms. The variance decreases as the number of samples used to train the critic (Line 4 in Algorithm 1) increases. The bias can be decomposed into an optimization error (that decreases as  $m_c$  increases) and a function approximation error (that decreases as we use more expressive models for the critic). The last term is the projection (onto  $\Pi$ ) error, is equal to zero for the tabular policy parameterization and decreases as  $m_a$  increases.

In contrast to Prop. 3, Dong et al. [11] prove that their proposed algorithm results in an  $O(1/T)$  convergence to the stationary point (not the neighbourhood). However, they make a strong unjustified assumption that the minimization problem w.r.t the parameters modelling the policy and distribution over states is jointly PL. Compared to [2, 60, 35] that focus on proving convergence to the (neighbourhood) of the optimal value function, but bound the critic error in the  $\ell_2$  or  $\ell_\infty$  norm, we focus on proving convergence to the (neighbourhood) of a stationary point, but define the critic loss in a decision-aware manner. Finally, compared to the existing theoretical work on general (not decision-aware) AC methods [61, 59, 8, 27, 21, 29, 18, 40, 9] that prove stronger results for the tabular or linear function approximation settings, we develop a practical decision-aware AC algorithm that has weaker theoretical guarantees, but requires fewer assumptions on the function approximation.

## 5 Instantiating the generic actor-critic framework

We now instantiate Algorithm 1 for the direct (Sec. 5.1) and softmax representation (Sec. 5.2).

### 5.1 Direct representation

Recall that for the direct functional representation, policy  $\pi$  is represented by the set of distributions  $p^\pi(\cdot|s)$  over actions for each state  $s \in \mathcal{S}$ . Using the policy gradient theorem [52],  $\nabla_\pi J(\pi) = d^\pi(s) Q^\pi(s, a)$ . Similar to [56, 60], we use a weighted (across states) negative entropy mirror map implying that  $D_\Phi(p^\pi, p^{\pi'}) = \sum_{s \in \mathcal{S}} d^{\pi_t}(s) D_\phi(p^\pi(\cdot|s), p^{\pi'}(\cdot|s))$  where  $\phi(p^\pi(\cdot|s)) = -\sum_a p^\pi(a|s) \log(p^\pi(a|s))$  and hence,  $D_\phi(p^\pi(\cdot|s), p^{\pi'}(\cdot|s)) = \text{KL}(p^\pi(\cdot|s) \| p^{\pi'}(\cdot|s))$ . We now instantiate **inequality (I)** in Sec. 3.2 in the proposition below (see App. E for the derivation).

275 **Proposition 4.** For the direct representation and negative entropy mirror map,  $c > 0$ ,  $\eta \leq \frac{(1-\gamma)^3}{2\gamma|A|}$ ,

$$J(\pi) - J(\pi_t) \geq C + \mathbb{E}_{s \sim d^{\pi_t}} \left[ \mathbb{E}_{a \sim p^{\pi_t}(\cdot|s)} \left[ \frac{p^\pi(a|s)}{p^{\pi_t}(a|s)} \left( \hat{Q}^{\pi_t}(s, a) - \left( \frac{1}{\eta} + \frac{1}{c} \right) \log \left( \frac{p^\pi(a|s)}{p^{\pi_t}(a|s)} \right) \right) \right] \right. \\ \left. - \mathbb{E}_{s \sim d^{\pi_t}} \left[ \mathbb{E}_{a \sim p^{\pi_t}(\cdot|s)} [Q^{\pi_t}(s, a) - \hat{Q}^{\pi_t}(s, a)] + \frac{1}{c} \log \left( \mathbb{E}_{a \sim p^{\pi_t}(\cdot|s)} \left[ \exp \left( -c [Q^{\pi_t}(s, a) - \hat{Q}^{\pi_t}(s, a)] \right) \right] \right) \right] \right]$$

276 where  $C$  is a constant and  $\hat{Q}^{\pi_t}$  is the estimate of the action-value function for policy  $\pi_t$ .

277 For incorporating policy (with parameters  $\theta$ ) and critic (with parameters  $\omega$ ) parameterization, we  
 278 note that  $p^\pi(\cdot|s) = p^\pi(\cdot|s, \theta)$  and  $\hat{Q}^\pi(s, a) = Q^\pi(s, a|\omega)$  where the model is implicit in the notation.  
 279 Using the reasoning in Sec. 3.2 with Prop. 4 immediately gives us the actor and critic objectives ( $\ell_t(\theta)$   
 280 and  $L_t(\omega)$  respectively) at iteration  $t$  and completely instantiates Algorithm 1. Observe that the critic  
 281 error is asymmetric and penalizes the under/over-estimation of the  $Q^\pi$  function differently. This is  
 282 different from the standard squared critic loss:  $E_{s \sim d^{\pi_t}} \mathbb{E}_{a \sim p^{\pi_t}(\cdot|s)} [Q^{\pi_t}(s, a) - Q^{\pi_t}(s, a|\omega)]^2$  that  
 283 does not take into account the sign of the misestimation. In order to demonstrate the effectiveness of  
 284 the proposed critic loss, we consider the following two-armed bandit example (see App. E for details)  
 285 with deterministic rewards (there is no variance due to sampling), use the direct representation and  
 286 tabular parameterization for the policy, linear function approximation for the critic and compare  
 287 minimizing the standard squared loss with minimizing the decision-aware critic loss in Prop. 4.

288 **Proposition 5.** Consider a two-armed bandit example with deterministic rewards where arm 1 is  
 289 optimal and has a reward  $r_1 = Q_1 = 2$  whereas arm 2 has reward  $r_2 = Q_2 = 1$ . Consider using  
 290 linear function approximation to estimate the  $Q$  function i.e.  $\hat{Q} = x\omega$  where  $\omega$  is the parameter to  
 291 be learned and  $x$  is the feature of the corresponding arm. Let  $x_1 = -2$  and  $x_2 = 1$  implying that  
 292  $\hat{Q}_1(\omega) = -2\omega$  and  $\hat{Q}_2(\omega) = \omega$ . Let  $p_t$  be the probability of pulling the optimal arm at iteration  $t$   
 293 and consider minimizing two alternative objectives to estimate  $\omega$ :

294 (1) Squared loss:  $\omega_t^{(1)} := \arg \min \left\{ \frac{p_t}{2} [\hat{Q}_1(\omega) - Q_1]^2 + \frac{1-p_t}{2} [\hat{Q}_2(\omega) - Q_2]^2 \right\}$ .

295 (2) Decision-aware critic loss:  $\omega_t^{(2)} = \arg \min \mathcal{L}_t(\omega) := p_t [Q_1 - \hat{Q}_1(\omega)] + (1 - p_t) [Q_2 - \hat{Q}_2(\omega)] +$   
 296  $\frac{1}{c} \log \left( p_t \exp \left( -c [Q_1 - \hat{Q}_1(\omega)] \right) + (1 - p_t) \exp \left( -c [Q_2 - \hat{Q}_2(\omega)] \right) \right)$ .

297 For  $p_0 < \frac{2}{5}$ , minimizing the squared loss results in convergence to the sub-optimal action, while  
 298 minimizing the decision-aware loss (for  $c, p_0 > 0$ ) results in convergence to the optimal action.

299 Hence, minimizing the decision-aware critic loss results in a better, more well-informed estimate of  $\omega$   
 300 which when coupled with the actor update results in convergence to the optimal arm. For this simple  
 301 example, at every iteration  $t$ ,  $\mathcal{L}_t(\omega_t^{(2)}) = 0$ , while the standard squared loss is non-zero at  $\omega_t^{(1)}$ ,  
 302 though we use the same linear function approximation model in both cases. In Prop. 22, we prove  
 303 that for a 2-arm bandit with deterministic rewards and linear critic parameterization, minimizing the  
 304 decision-aware critic loss will always result in convergence to the optimal arm.

## 305 5.2 Softmax representation

306 Recall that for the softmax functional representation, policy  $\pi$  is represented by the logits  $z^\pi(s, a)$   
 307 for each  $s \in \mathcal{S}$  and  $a \in \mathcal{A}$  such that  $p^\pi(a|s) = \frac{\exp(z^\pi(s, a))}{\sum_{a'} \exp(z^\pi(s, a'))}$ . Using the policy gradi-  
 308 ent theorem,  $\nabla_\pi J(\pi) = d^\pi(s) A^\pi(s, a) p^\pi(a|s)$  where  $A^\pi$  is the advantage function. Similar  
 309 to Vaswani et al. [56], we use a weighted (across states) log-sum-exp mirror map implying that  
 310  $D_\Phi(z, z') = \sum_{s \in \mathcal{S}} d^{\pi_t}(s) D_\phi(z(s, \cdot), z'(s, \cdot))$  where  $\phi(z(s, \cdot)) = \log(\sum_a \exp(z(s, a)))$  and hence,  
 311  $D_\phi(z(s, \cdot), z'(s, \cdot)) = \text{KL}(p^{\pi'}(\cdot|s), p^\pi(\cdot|s))$  (see Lemma 28 for a derivation). We now instantiate  
 312 **inequality (I)** in Sec. 3.2 in the proposition below (see App. E for the derivation).

313 **Proposition 6.** For the softmax representation and log-sum-exp mirror map,  $c > 0$ ,  $\eta \leq 1 - \gamma$ ,

$$J(\pi) - J(\pi_t) \geq \mathbb{E}_{s \sim d^{\pi_t}} \mathbb{E}_{a \sim p^{\pi_t}(\cdot|s)} \left[ \left( \hat{A}^{\pi_t}(s, a) + \frac{1}{\eta} + \frac{1}{c} \right) \log \left( \frac{p^\pi(a|s)}{p^{\pi_t}(a|s)} \right) \right] \\ - \frac{1}{c} \mathbb{E}_{s \sim d^{\pi_t}} \mathbb{E}_{a \sim p^{\pi_t}(\cdot|s)} \left[ \left( 1 - c [A^{\pi_t}(s, a) - \hat{A}^{\pi_t}(s, a)] \right) \log \left( 1 - c [A^{\pi_t}(s, a) - \hat{A}^{\pi_t}(s, a)] \right) \right],$$

314 where  $\hat{A}^{\pi_t}$  is the estimate of the advantage function for policy  $\pi_t$ .

315 For incorporating policy (with parameters  $\theta$ ) and critic (with parameters  $\omega$ ) parameterization, we  
 316 note that  $p^\pi(a|s) = \frac{\exp(z^\pi(s, a|\theta))}{\sum_{a'} \exp(z^\pi(s, a'|\theta))}$  and  $\hat{A}^\pi(s, a) = A^\pi(s, a|\omega)$  where the model is implicit in

the notation. Using the reasoning in Sec. 3.2 with Prop. 6 immediately gives us the actor and critic objectives ( $\ell_t(\theta)$  and  $L_t(\omega)$  respectively) at iteration  $t$  and completely instantiates Algorithm 1. Similar to the direct representation, observe that  $\mathcal{L}_t$  is asymmetric and penalizes the under/over-estimation of the advantage function differently. To demonstrate the effectiveness of the proposed critic loss, we construct a two-armed bandit example (see App. E for details), use the softmax representation and tabular parameterization for the policy and consider a discrete hypothesis class (with two hypotheses) as the model for the critic. We compare minimizing the squared loss on the advantage:  $E_{s \sim d^{\pi_t}} \mathbb{E}_{a \sim p^{\pi_t}(\cdot|s)} [A^{\pi_t}(s, a) - A^{\pi_t}(s, a|\omega)]^2$  with minimizing the decision-aware loss.

**Proposition 7.** Consider a two-armed bandit example and define  $p \in [0, 1]$  as the probability of pulling arm 1. Given  $p$ , let the advantage of arm 1 be equal to  $A_1 := \frac{1}{2} > 0$ , while that of arm 2 is  $A_2 := -\frac{p}{2(1-p)} < 0$  implying that arm 1 is optimal. For  $\varepsilon \in (\frac{1}{2}, 1)$ , consider approximating the advantage of the two arms using a function approximation model with two hypotheses that depend on  $p$ :  $\mathcal{H}_0 : \hat{A}_1 = \frac{1}{2} + \varepsilon, \hat{A}_2 = -\frac{p}{1-p} (\frac{1}{2} + \varepsilon)$  and  $\mathcal{H}_1 : \hat{A}_1 = \frac{1}{2} - \varepsilon \operatorname{sgn}(\frac{1}{2} - p), \hat{A}_2 = -\frac{p}{1-p} (\frac{1}{2} - \varepsilon \operatorname{sgn}(\frac{1}{2} - p))$  where  $\operatorname{sgn}$  is the signum function. If  $p_t$  is the probability of pulling arm 1 at iteration  $t$ , consider minimizing two alternative loss functions to choose the hypothesis  $\mathcal{H}_t$ :

(1) Squared loss:  $\mathcal{H}_t = \arg \min_{\{\mathcal{H}_0, \mathcal{H}_1\}} \left\{ \frac{p_t}{2} [A_1 - \hat{A}_1]^2 + \frac{1-p_t}{2} [A_2 - \hat{A}_2]^2 \right\}$ .

(2) Decision-aware critic loss with  $c = 1$ :  $\mathcal{H}_t = \arg \min_{\{\mathcal{H}_0, \mathcal{H}_1\}}$

$\left\{ p_t (1 - [A_1 - \hat{A}_1]) \log(1 - [A_1 - \hat{A}_1]) + (1 - p_t) (1 - [A_2 - \hat{A}_2]) \log(1 - [A_2 - \hat{A}_2]) \right\}$ .

For  $p_0 \leq \frac{1}{2}$ , the squared loss cannot distinguish between  $\mathcal{H}_0$  and  $\mathcal{H}_1$ , and depending on how ties are broken, minimizing it can result in convergence to the sub-optimal action. On the other hand, minimizing the divergence loss (for any  $p_0 > 0$ ) results in convergence to the optimal arm.

We see that minimizing the decision-aware critic loss can distinguish between the two hypotheses and choose the correct hypothesis resulting in convergence to the optimal action.

In Prop. 19 in App. E, we study the softmax representation with the Euclidean mirror map and instantiate **inequality (I)** for this case. Finally, in App. B, we instantiate our actor-critic framework to handle stochastic value gradients used for learning continuous control policies [20]. In the next section, we consider simple RL environments to empirically benchmark Algorithm 1.

## 6 Experiments

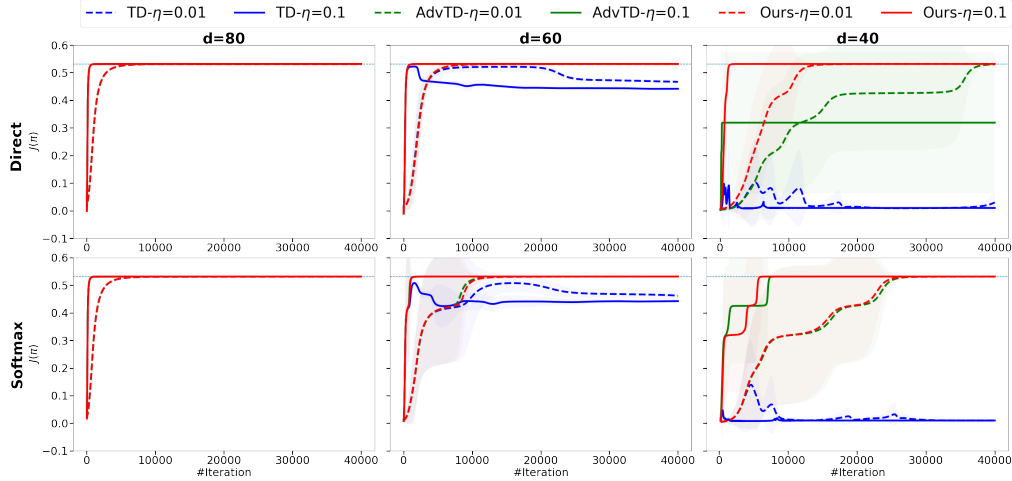

Figure 1: Comparison of decision-aware, AdvTD and TD loss functions using a linear actor and linear (with three different dimensions) critic in the Cliff World environment for direct and softmax policy representations. For  $d = 80$  (corresponding to an expressive critic), all algorithms have the same performance. For  $d = 40$  and  $d = 60$ , TD does not have monotonic improvement and converges to a sub-optimal policy. AdvTD almost always reaches the optimal policy. Compared to the AdvTD and TD, minimizing the decision-aware loss always results in convergence to the optimal policy at a faster rate, especially when using a less expressive critic ( $d = 40$ ).

We demonstrate the benefit of the decision-aware framework over the standard AC algorithm where the critic is trained by minimizing the squared error. We instantiate Algorithm 1 for the direct and



softmax representations, and evaluate the performance on two grid-world environments, namely Cliff World [52] and Frozen Lake [6] (see App. F for details). We compare the performance of three AC algorithms that have the same actor, but differ in the objective function used to train the critic.

**Critic Optimization:** For the direct and softmax representations, the critic’s objective is to estimate the action-value ( $Q$ ) and advantage ( $A$ ) functions respectively. We use a linear parameterization for the  $Q$  function implying that for each policy  $\pi$ ,  $Q^\pi(s, a|\omega) = \langle \omega, \mathbf{X}(s, a) \rangle$ , where  $\mathbf{X}(s, a) \in \mathbb{R}^d$  are features obtained via tile-coding [52, Ch. 9]. We vary the dimension  $d \in \{80, 60, 40\}$  of the tile-coding features to vary the expressivity of the critic. Given the knowledge of  $p^\pi$  and the estimate  $Q^\pi(s, a|\omega)$ , the estimated advantage can be obtained as:  $A^\pi(s, a|\omega) = Q^\pi(s, a|\omega) - \sum_a p^\pi(a|s) Q^\pi(s, a|\omega)$ . We consider two ways to estimate the  $Q$  function for training the critic: (a) using the known MDP to exactly compute the  $Q$  values and (b) estimating the  $Q$  function using Monte-Carlo (MC) rollouts. We evaluate the performance of the decision-aware loss defined for the direct (Prop. 4) and softmax representations (Prop. 6). For both representations, we minimize the corresponding objective at each iteration  $t$  (Lines 6-8 in Algorithm 1) using gradient descent with the step-size  $\alpha_c$  determined by the Armijo line-search [4]. We use a grid-search to tune the trade-off parameter  $c$ , and propose an alternative albeit conservative method to estimate  $c$  in App. F. We compare against two baselines (see App. F for implementation details) – (i) the standard squared loss on the  $Q$  functions (referred to as TD in the plots) defined in Prop. 5 and (ii) squared loss on  $A$  function (referred to as AdvTD in the plots) defined in Prop. 7. We note that the AdvTD loss corresponds to a second-order Taylor series expansion of the decision-aware loss (see Prop. 20 for details), and is similar to the loss in Pan et al. [41]. Recall that the critic error consists of the variance when using MC samples (equal to zero when we exactly compute the  $Q$  function) and the bias because of the critic optimization error (controlled since the critic objective is convex) and error due to the limited expressivity of the linear function approximation (decreases as  $d$  increases). Since our objective is to study the effect of the critic loss and its interaction with function approximation, we do not use bootstrapping to estimate the  $Q^\pi$  since it would result in a confounding bias term.

**Actor Optimization:** For all algorithms, we use the same actor objective defined for the direct (Prop. 4) and softmax representations (Prop. 6). We consider both the tabular and linear policy parameterization for the actor. For the linear function approximation, we use the same tile-coded features and set  $n = 60$  for both environments. We update the policy parameters at each iteration  $t$  in the off-policy inner-loop (Lines 11-13 in Algorithm 1) using Armijo line-search to set  $\alpha_a$ . For details about the derivatives and closed-form solutions for the actor objective, please refer to [56, App. F] and App. F. We use a grid-search to tune  $\eta$ , and experiment with multiple values.

**Results:** For each environment, we conduct four experiments that depend on (a) whether we use MC samples or the true dynamics to estimate the  $Q$  function, and (b) on the policy parameterization. We only show the plot corresponding to using the true dynamics for estimating the  $Q$  function and linear policy parameterization, and defer the remaining plots to App. G. For all experiments, we report the mean and 95% confidence interval of  $J(\pi)$  averaged across 5 runs. In the main paper, we only include 2 values of  $\eta \in \{0.01, 0.1\}$  and vary  $d \in \{40, 60, 80\}$ , and defer the complete figure with a broader range of  $\eta$  and  $d$  to App. G. For this experiment,  $c$  is tuned to 0.01 and we include a sensitivity (of  $J(\pi)$  to  $c$ ) plot in App. G. From Fig. 1, we see that (i) with a sufficiently expressive critic ( $d = 80$ ), all algorithms reach the optimal policy at nearly the same rate. (ii) as we decrease the critic capacity, minimizing the TD loss does not result in monotonic improvement and converges to a sub-optimal policy, (iii) minimizing the AdvTD usually results in convergence to the optimal policy, whereas (iv) minimizing the decision-aware loss results in convergence to better policies at a faster rate, and is more beneficial when using a less-expressive critic (corresponding to  $d = 40$ ). We obtain similar results for the tabular policy parameterization or when using sampling to estimate the  $Q$  function (see App. G for additional results).

## 7 Discussion

We designed a generic decision-aware actor-critic framework where the actor and critic are trained cooperatively to optimize a joint objective. Our framework can be used with any policy representation and easily handle general policy and critic parameterization, while preserving theoretical guarantees. Instantiating the framework resulted in an actor that supports off-policy updates, and a corresponding critic loss that can be minimized using first-order optimization. We demonstrated the benefit of our framework both theoretically and empirically. In the future, we aim to benchmark our framework for complex deep RL environments, and broaden its scope to applications such as variational inference.

## References

- [1] Romina Abachi. *Policy-aware model learning for policy gradient methods*. PhD thesis, University of Toronto (Canada), 2020.
- [2] Alekh Agarwal, Sham M. Kakade, Jason D. Lee, and Gaurav Mahajan. Optimality and approximation with policy gradient methods in Markov decision processes. In *Conference on Learning Theory (COLT)*, pages 64–66, 2020.
- [3] Shun-Ichi Amari. Natural gradient works efficiently in learning. *Neural Computation*, 10(2): 251–276, February 1998.
- [4] Larry Armijo. Minimization of functions having lipschitz continuous first partial derivatives. *Pacific Journal of mathematics*, 16(1):1–3, 1966.
- [5] Shalabh Bhatnagar, Richard S Sutton, Mohammad Ghavamzadeh, and Mark Lee. Natural actor–critic algorithms. *Automatica*, 45(11):2471–2482, 2009.
- [6] Greg Brockman, Vicki Cheung, Ludwig Pettersson, Jonas Schneider, John Schulman, Jie Tang, and Wojciech Zaremba. Openai gym, 2016.
- [7] Sébastien Bubeck. Convex optimization: Algorithms and complexity. *Foundations and Trends® in Machine Learning*, 8(3-4):231–357, 2015.
- [8] Semih Cayci, Niao He, and R Srikant. Finite-time analysis of entropy-regularized neural natural actor-critic algorithm. *arXiv preprint arXiv:2206.00833*, 2022.
- [9] Tianyi Chen, Yuejiao Sun, and Wotao Yin. Tighter analysis of alternating stochastic gradient method for stochastic nested problems. *arXiv preprint arXiv:2106.13781*, 2021.
- [10] Bo Dai, Albert Shaw, Niao He, Lihong Li, and Le Song. Boosting the actor with dual critic. *arXiv preprint arXiv:1712.10282*, 2017.
- [11] Jing Dong, Li Shen, Yinggan Xu, and Baoxiang Wang. Provably efficient convergence of primal-dual actor-critic with nonlinear function approximation. *arXiv preprint arXiv:2202.13863*, 2022.
- [12] Ryan D’Orazio, Nicolas Loizou, Issam Laradji, and Ioannis Mitliagkas. Stochastic mirror descent: Convergence analysis and adaptive variants via the mirror stochastic polyak stepsize. *arXiv preprint arXiv:2110.15412*, 2021.
- [13] Pierluca D’Oro and Wojciech Jaśkowski. How to learn a useful critic? model-based action-gradient-estimator policy optimization. *Advances in Neural Information Processing Systems*, 33:313–324, 2020.
- [14] Pierluca D’Oro, Alberto Maria Metelli, Andrea Tirinzoni, Matteo Papini, and Marcello Restelli. Gradient-aware model-based policy search. In *Proceedings of the AAAI Conference on Artificial Intelligence*, volume 34, pages 3801–3808, 2020.
- [15] Radu Alexandru Dragomir, Mathieu Even, and Hadrien Hendrikx. Fast stochastic bregman gradient methods: Sharp analysis and variance reduction. In *International Conference on Machine Learning*, pages 2815–2825. PMLR, 2021.
- [16] Amir-massoud Farahmand. Iterative value-aware model learning. *Advances in Neural Information Processing Systems*, 31, 2018.
- [17] Amir-massoud Farahmand, Andre Barreto, and Daniel Nikovski. Value-aware loss function for model-based reinforcement learning. In *Artificial Intelligence and Statistics*, pages 1486–1494. PMLR, 2017.
- [18] Zuyue Fu, Zhuoran Yang, and Zhaoran Wang. Single-timescale actor-critic provably finds globally optimal policy. *arXiv preprint arXiv:2008.00483*, 2020.
- [19] Tuomas Haarnoja, Aurick Zhou, Pieter Abbeel, and Sergey Levine. Soft actor-critic: Off-policy maximum entropy deep reinforcement learning with a stochastic actor. *arXiv preprint arXiv:1801.01290*, 2018.

- [20] Nicolas Heess, Gregory Wayne, David Silver, Timothy Lillicrap, Tom Erez, and Yuval Tassa. Learning continuous control policies by stochastic value gradients. In *Advances in Neural Information Processing Systems*, pages 2944–2952, 2015.
- [21] Mingyi Hong, Hoi-To Wai, Zhaoran Wang, and Zhuoran Yang. A two-timescale stochastic algorithm framework for bilevel optimization: Complexity analysis and application to actor-critic. *SIAM Journal on Optimization*, 33(1):147–180, 2023.
- [22] Shariq Iqbal and Fei Sha. Actor-attention-critic for multi-agent reinforcement learning. In *International conference on machine learning*, pages 2961–2970. PMLR, 2019.
- [23] Emmeran Johnson, Ciara Pike-Burke, and Patrick Rebeschini. Optimal convergence rate for exact policy mirror descent in discounted markov decision processes. *arXiv preprint arXiv:2302.11381*, 2023.
- [24] Sham Kakade. A natural policy gradient. In *NIPS*, volume 14, pages 1531–1538, 2001.
- [25] Sham Kakade and John Langford. Approximately optimal approximate reinforcement learning. In *International Conference on Machine Learning (ICML)*, pages 267–274, 2002.
- [26] Hamed Karimi, Julie Nutini, and Mark Schmidt. Linear convergence of gradient and proximal-gradient methods under the polyak-łojasiewicz condition. In *Machine Learning and Knowledge Discovery in Databases: European Conference, ECML PKDD 2016, Riva del Garda, Italy, September 19-23, 2016, Proceedings, Part I 16*, pages 795–811. Springer, 2016.
- [27] Sajad Khodadadian, Thinh T Doan, Justin Romberg, and Siva Theja Maguluri. Finite sample analysis of two-time-scale natural actor-critic algorithm. *IEEE Transactions on Automatic Control*, 2022.
- [28] Vijay Konda and John Tsitsiklis. Actor-critic algorithms. *Advances in neural information processing systems*, 12, 1999.
- [29] Harshat Kumar, Alec Koppel, and Alejandro Ribeiro. On the sample complexity of actor-critic method for reinforcement learning with function approximation. *Machine Learning*, pages 1–35, 2023.
- [30] Jonathan Wilder Lavington, Sharan Vaswani, Reza Babanezhad, Mark Schmidt, and Nicolas Le Roux. Target-based surrogates for stochastic optimization. *arXiv preprint arXiv:2302.02607*, 2023.
- [31] Chongchong Li, Yue Wang, Wei Chen, Yuting Liu, Zhi-Ming Ma, and Tie-Yan Liu. Gradient information matters in policy optimization by back-propagating through model. In *International Conference on Learning Representations*, 2021.
- [32] Chaoyue Liu, Libin Zhu, and Mikhail Belkin. Loss landscapes and optimization in over-parameterized non-linear systems and neural networks. *Applied and Computational Harmonic Analysis*, 59:85–116, 2022.
- [33] Haihao Lu, Robert M Freund, and Yurii Nesterov. Relatively smooth convex optimization by first-order methods, and applications. *SIAM Journal on Optimization*, 28(1):333–354, 2018.
- [34] Yuping Luo, Huazhe Xu, Yuanzhi Li, Yuandong Tian, Trevor Darrell, and Tengyu Ma. Algorithmic framework for model-based deep reinforcement learning with theoretical guarantees. *arXiv preprint arXiv:1807.03858*, 2018.
- [35] Jincheng Mei, Chenjun Xiao, Ruitong Huang, Dale Schuurmans, and Martin Müller. On principled entropy exploration in policy optimization. In *IJCAI*, pages 3130–3136, 2019.
- [36] Jincheng Mei, Chenjun Xiao, Csaba Szepesvari, and Dale Schuurmans. On the global convergence rates of softmax policy gradient methods. *arXiv preprint arXiv:2005.06392*, 2020.
- [37] Volodymyr Mnih, Koray Kavukcuoglu, David Silver, Andrei A Rusu, Joel Veness, Marc G Bellemare, Alex Graves, Martin Riedmiller, Andreas K Fidjeland, Georg Ostrovski, et al. Human-level control through deep reinforcement learning. *nature*, 518(7540):529–533, 2015.

- [38] Shakir Mohamed, Mihaela Rosca, Michael Figurnov, and Andriy Mnih. Monte carlo gradient estimation in machine learning. *The Journal of Machine Learning Research*, 21(1):5183–5244, 2020.
- [39] Junhyuk Oh, Satinder Singh, and Honglak Lee. Value prediction network. *Advances in neural information processing systems*, 30, 2017.
- [40] Alex Olshevsky and Bahman Ghahesifard. A small gain analysis of single timescale actor critic. *arXiv preprint arXiv:2203.02591*, 2022.
- [41] Hsiao-Ru Pan, Nico Gürtler, Alexander Neitz, and Bernhard Schölkopf. Direct advantage estimation. *Advances in Neural Information Processing Systems*, 35:11869–11880, 2022.
- [42] Jan Peters, Sethu Vijayakumar, and Stefan Schaal. Natural actor-critic. In *Machine Learning: ECML 2005: 16th European Conference on Machine Learning, Porto, Portugal, October 3-7, 2005. Proceedings 16*, pages 280–291. Springer, 2005.
- [43] Martin L. Puterman. *Markov Decision Processes: Discrete Stochastic Dynamic Programming*. John Wiley & Sons, Inc., USA, 1994.
- [44] Andrew J Schaefer, Matthew D Bailey, Steven M Shechter, and Mark S Roberts. Modeling medical treatment using Markov decision processes. In *Operations research and health care*, pages 593–612. Springer, 2005.
- [45] John Schulman, Sergey Levine, Pieter Abbeel, Michael Jordan, and Philipp Moritz. Trust region policy optimization. In *International Conference on Machine Learning (ICML)*, pages 1889–1897, 2015.
- [46] John Schulman, Xi Chen, and Pieter Abbeel. Equivalence between policy gradients and soft q-learning. *arXiv preprint arXiv:1704.06440*, 2017.
- [47] John Schulman, Filip Wolski, Prafulla Dhariwal, Alec Radford, and Oleg Klimov. Proximal policy optimization algorithms. *CoRR*, abs/1707.06347, 2017.
- [48] David Silver, Guy Lever, Nicolas Heess, Thomas Degris, Daan Wierstra, and Martin Riedmiller. Deterministic policy gradient algorithms. *Journal of Machine Learning Research*, 2014.
- [49] David Silver, Aja Huang, Chris J Maddison, Arthur Guez, Laurent Sifre, George Van Den Driessche, Julian Schrittwieser, Ioannis Antonoglou, Veda Panneershelvam, Marc Lanctot, et al. Mastering the game of go with deep neural networks and tree search. *Nature*, 529(7587):484, 2016.
- [50] David Silver, Hado Hasselt, Matteo Hessel, Tom Schaul, Arthur Guez, Tim Harley, Gabriel Dulac-Arnold, David Reichert, Neil Rabinowitz, Andre Barreto, et al. The predictron: End-to-end learning and planning. In *International Conference on Machine Learning*, pages 3191–3199. PMLR, 2017.
- [51] Richard S Sutton. Learning to predict by the methods of temporal differences. *Machine learning*, 3(1):9–44, 1988.
- [52] Richard S. Sutton and Andrew G. Barto. *Reinforcement Learning: An Introduction*. MIT Press, 2 edition, 2018.
- [53] Richard S Sutton, David A McAllester, Satinder P Singh, and Yishay Mansour. Policy gradient methods for reinforcement learning with function approximation. In *Advances in Neural Information Processing Systems (NeurIPS)*, pages 1057–1063, 2000.
- [54] Jie Tan, Tingnan Zhang, Erwin Coumans, Atil Iscen, Yunfei Bai, Danijar Hafner, Steven Bohez, and Vincent Vanhoucke. Sim-to-real: Learning agile locomotion for quadruped robots. *arXiv preprint arXiv:1804.10332*, 2018.
- [55] Manan Tomar, Lior Shani, Yonathan Efroni, and Mohammad Ghavamzadeh. Mirror descent policy optimization. *arXiv preprint arXiv:2005.09814*, 2020.

- 542 [56] Sharan Vaswani, Olivier Bachem, Simone Totaro, Robert Müller, Shivam Garg, Matthieu Geist,  
543 Marlos C Machado, Pablo Samuel Castro, and Nicolas Le Roux. A general class of surrogate  
544 functions for stable and efficient reinforcement learning. *arXiv preprint arXiv:2108.05828*,  
545 2021.
- 546 [57] Christopher John Cornish Hellaby Watkins. Learning from delayed rewards. 1989.
- 547 [58] Ronald J Williams. Simple statistical gradient-following algorithms for connectionist reinforce-  
548 ment learning. *Machine learning*, 8(3-4):229–256, 1992.
- 549 [59] Yue Frank Wu, Weitong Zhang, Pan Xu, and Quanquan Gu. A finite-time analysis of two  
550 time-scale actor-critic methods. *Advances in Neural Information Processing Systems*, 33:  
551 17617–17628, 2020.
- 552 [60] Lin Xiao. On the convergence rates of policy gradient methods. *Journal of Machine Learning*  
553 *Research*, 23(282):1–36, 2022.
- 554 [61] Tengyu Xu, Zhe Wang, and Yingbin Liang. Non-asymptotic convergence analysis of two  
555 time-scale (natural) actor-critic algorithms. *arXiv preprint arXiv:2005.03557*, 2020.
- 556 [62] Rui Yuan, Robert M Gower, and Alessandro Lazaric. A general sample complexity analysis  
557 of vanilla policy gradient. In *International Conference on Artificial Intelligence and Statistics*,  
558 pages 3332–3380. PMLR, 2022.
- 559 [63] Andy Zeng, Shuran Song, Johnny Lee, Alberto Rodriguez, and Thomas Funkhouser. Tossingbot:  
560 Learning to throw arbitrary objects with residual physics. *IEEE Transactions on Robotics*, 36  
561 (4):1307–1319, 2020.
- 562 [64] Siqi Zhang and Niao He. On the convergence rate of stochastic mirror descent for nonsmooth  
563 nonconvex optimization. *arXiv preprint arXiv:1806.04781*, 2018.



# Supplementary material

## Organization of the Appendix

- A Definitions
- B Extension to stochastic value gradients
- C Proofs for Sec. 3
- D Proofs for Sec. 4
- E Proofs for Sec. 5
- F Implementation Details
- G Additional Experiments

## A Definitions

- **[Solution set]**. We define the solution set  $\mathcal{X}^*$  for a function  $f$  as  $\mathcal{X}^* := \{x^* | x^* \in \arg \min_{x \in \text{dom}(f)} f(x)\}$ .

- **[Convexity]**. A differentiable function  $f$  is convex iff for all  $v$  and  $w$  in  $\text{dom}(f)$

$$f(v) \geq f(w) + \langle \nabla f(w), v - w \rangle. \quad (\text{Convexity})$$

- **[Lipschitz continuity]**. A differentiable function  $f$  is  $G$ -Lipschitz continuous, meaning that for all  $v$  and  $w$  and constant  $G >$ ,

$$|f(v) - f(w)| \leq G \|v - w\| \implies \|\nabla f(v)\| \leq G. \quad (\text{Lipschitz Continuity})$$

- **[Smoothness]**. A differentiable function  $f$  is  $L$ -smooth, meaning that for all  $v$  and  $w$  and some constant  $L > 0$

$$f(v) \leq f(w) + \langle \nabla f(w), v - w \rangle + \frac{L}{2} \|v - w\|_2^2. \quad (\text{Smoothness})$$

- **[Polyak-Lojasiewicz inequality]**. A differentiable function  $f$  satisfies the Polyak-Lojasiewicz (PL) inequality if there exists a constant  $\mu_p > 0$  s.t. for all  $v$ ,

$$\mu_p (f(v) - f^*) \leq \frac{1}{2} \|\nabla f(v)\|_2^2, \quad (\text{PL})$$

where  $f^*$  is the optimal function value i.e.  $f^* := f(x^*)$  for  $x^* \in \mathcal{X}^*$ .

- **[Restricted Secant Inequality]**. A differentiable function  $f$  satisfies the Restricted Secant Inequality (RSI) inequality if there exists a constant  $\mu_r > 0$  that for all  $v$

$$\langle \nabla f(v), v - v_p \rangle \geq \mu_r \|v - v_p\|_2^2, \quad (\text{RSI})$$

where  $v_p$  is the projection of  $v$  onto  $\mathcal{X}^*$ .

- **[Bregman divergence]**. For a strictly-convex, differentiable function  $\Phi$ , we define the Bregman divergence induced by  $\Phi$  (known as the mirror map) as:

$$D_\Phi(w, v) := \Phi(w) - \Phi(v) - \langle \nabla \Phi(v), w - v \rangle. \quad (\text{Bregman divergence})$$

- **[Relative smoothness]**. A function  $f$  is  $\rho$ -relatively smooth w.r.t.  $D_\Phi$  iff  $f + \rho\Phi$  is convex. Furthermore, if  $f$  is  $\rho$ -relatively smooth w.r.t.  $\Phi$ , then,  $|f(w) - f(v) - \langle \nabla f(v), w - v \rangle| \leq \rho D_\Phi(w, v)$ .

- **[Mirror Ascent]**. Optimizing  $\max_{x \in \mathcal{X}} f(x)$  using mirror ascent (MA), if  $x_t$  is the current iterate, then the update at iteration  $t \in \{0, 1, \dots, T-1\}$  with a step-size  $\eta_t$  and mirror map  $\Phi$  is given as:

$$x_{t+1} := \arg \max_{x \in \mathcal{X}} \left\{ \langle \nabla f(x_t), x \rangle - \frac{1}{\eta_t} D_\Phi(x, x_t) \right\}, \quad (\text{MD update})$$

The above update can be formulated into two steps Bubeck [7, Chapter 4] as follows:

$$\begin{aligned} y_{t+1} &:= (\nabla \Phi)^{-1} (\nabla \Phi(x_t) + \eta_t \nabla f(x_t)) && (\text{Move in dual space}) \\ x_{t+1} &:= \arg \min_{x \in \mathcal{X}} \{D_\Phi(x, y_{t+1})\} && (\text{Projection step}) \end{aligned}$$

## B Extension to stochastic value gradients

In Sec. 5, we have seen alternative ways to represent a policy’s conditional distributions over actions  $p^\pi(\cdot|s)$  for each state  $s \in \mathcal{S}$ . On the other hand, stochastic value gradients [20] represent a policy by a set of actions. Formally, if  $\varepsilon$  are random variables drawn from a fixed distribution  $\chi$ , then policy  $\pi$  is a deterministic map from  $\mathcal{S} \times \chi \rightarrow \mathcal{A}$ . This corresponds to the functional representation of the policy, and is particularly helpful for continuous control, i.e. when the action-space is continuous. The action  $a$  chosen by  $\pi$  in state  $s$ , when fixing the random variable  $\varepsilon = \epsilon$ , is represented as  $\pi(s, \epsilon)$ , and the value function for policy  $\pi$  is given as:

$$J(\pi) = \sum_s d^\pi(s) \int_{\varepsilon \sim \chi} r(s, \pi(s, \varepsilon)) d\varepsilon \quad (1)$$

and Silver et al. [48] showed that  $\frac{\partial J(\pi)}{\partial \pi(s, \epsilon)} = d^\pi(s) \nabla_a Q^\pi(s, a)|_{a=\pi(s, \epsilon)}$ . In order to characterize the dependence on the policy parameterization, we note that  $\pi(s, \epsilon) = \pi(s, \epsilon, \theta)$  where  $\theta$  are the model parameters. For a fixed  $\epsilon$ , we will use a Euclidean mirror map implying that  $D_\Phi(\pi, \pi') = \sum_{s \in \mathcal{S}} d^{\pi_t}(s) D_\phi(\pi(s, \epsilon), \pi'(s, \epsilon))$  and choose  $\phi(\pi(s, \epsilon)) = \frac{1}{2} \|\pi'(s, \epsilon)\|_2^2$  implying that  $D_\phi(\pi(s, \epsilon), \pi'(s, \epsilon)) = \frac{1}{2} [\pi(s, \epsilon) - \pi'(s, \epsilon)]^2$ . In order to instantiate the generic lower bound in Prop. 1 at iteration  $t$ , we prove the following proposition in App. E.

**Proposition 8.** *For the stochastic value gradient representation and Euclidean mirror map,  $c > 0$ ,  $\eta$  such that  $J + \frac{1}{\eta}\Phi$  is convex in  $\pi$ .*

$$\begin{aligned} J(\pi) - J(\pi_t) &\geq C + \mathbb{E}_{s \sim d^{\pi_t}} \mathbb{E}_{\varepsilon \sim \chi} \left[ \widehat{\nabla_a Q^{\pi_t}}(s, a)|_{a=\pi_t(s, \varepsilon)} \pi(s, \varepsilon) - \frac{1}{2} \left( \frac{1}{\eta} + \frac{1}{c} \right) [\pi_t(s, \epsilon) - \pi(s, \epsilon)]^2 \right] \\ &\quad - \frac{c}{2} \mathbb{E}_{s \sim d^{\pi_t}} \mathbb{E}_{\varepsilon \sim \chi} \left[ \nabla_a Q^{\pi_t}(s, a)|_{a=\pi_t(s, \varepsilon)} - \widehat{\nabla_a Q^{\pi_t}}(s, a)|_{a=\pi_t(s, \varepsilon)} \right]^2 \end{aligned}$$

where  $C$  is a constant and  $\widehat{\nabla_a Q^{\pi_t}}(s, a)|_{a=\pi_t(s, \varepsilon)}$  is the estimate of the action-value gradients for policy  $\pi$  at state  $s$  and  $a = \pi_t(s, \epsilon)$ .

For incorporating policy (with parameters  $\theta$ ) and critic (with parameters  $\omega$ ) parameterization, we note that  $\pi(s, \varepsilon) = \pi(s, \varepsilon|\theta)$  and  $\widehat{\nabla_a Q^{\pi_t}}(s, a)|_{a=\pi_t(s, \varepsilon)} = \nabla_a Q^{\pi_t}(s, a|\omega)|_{a=\pi_t(s, \varepsilon, \theta_t)}$  where the model is implicit in the notation. Using the reasoning in Sec. 3.2 with Prop. 8 immediately gives us the actor and critic objectives ( $\ell_t(\theta)$  and  $L_t(\omega)$  respectively) at iteration  $t$  and completely instantiates Algorithm 1. The actor objective is similar to Eq (15) of Silver et al. [48], with the easier to compute  $Q^{\pi_t}$  instead of  $Q^\pi$ , whereas the critic objective is similar to the one used in existing work on policy-aware model-based RL for continuous control [13].

## C Proofs for Sec. 3

**Proposition 1.** For any policy representations  $\pi$  and  $\pi'$ , any strictly convex mirror map  $\Phi$ , and any gradient estimator  $\hat{g}$ , for  $c > 0$  and  $\eta$  such that  $J + \frac{1}{\eta}\Phi$  is convex in  $\pi$ ,

$$J(\pi) \geq J(\pi') + \langle \hat{g}(\pi'), \pi - \pi' \rangle - \left( \frac{1}{\eta} + \frac{1}{c} \right) D_{\Phi}(\pi, \pi') - \frac{1}{c} D_{\Phi^*} \left( \nabla \Phi(\pi') - c[\nabla J(\pi') - \hat{g}(\pi')], \nabla \Phi(\pi') \right)$$

where  $\Phi^*$  is the Fenchel conjugate of  $\Phi$  and  $D_{\Phi^*}$  is the Bregman divergence induced by  $\Phi^*$ .

*Proof.* For any  $\eta$  such that  $J + \frac{1}{\eta}\Phi$  is convex, we use Lemma 10 to form the following lower-bound,

$$\begin{aligned} J(\pi) &\geq J(\pi') + \langle \nabla J(\pi'), (\pi - \pi') \rangle - \frac{1}{\eta} D_{\Phi}(\pi, \pi') \\ &= J(\pi') + \langle \hat{g}(\pi'), (\pi - \pi') \rangle + \langle \nabla J(\pi') - \hat{g}(\pi'), (\pi - \pi') \rangle - \frac{1}{\eta} D_{\Phi}(\pi, \pi') \end{aligned}$$

Defining  $\delta := \nabla J(\pi') - \hat{g}(\pi')$ , and assuming that  $c\delta$  is small enough to satisfy the requirement for Lemma 9, we use Lemma 9 with  $x = \delta$ ,  $y = \pi$  and  $y' = \pi'$ .

$$\begin{aligned} &= J(\pi') + \langle \hat{g}(\pi'), (\pi - \pi') \rangle - \frac{1}{\eta} D_{\Phi}(\pi, \pi') - \frac{1}{c} [D_{\Phi}(\pi, \pi') + D_{\Phi^*}(\nabla \Phi(\pi') - c\delta, \nabla \Phi(\pi'))] \\ \implies J(\pi) &\geq J(\pi') + \hat{g}(\pi')^\top (\pi - \pi') - \left( \frac{1}{\eta} + \frac{1}{c} \right) D_{\Phi}(\pi, \pi') - \frac{1}{c} D_{\Phi^*} \left( \nabla \Phi(\pi') - c[\nabla J(\pi') - \hat{g}(\pi')], \nabla \Phi(\pi') \right) \end{aligned}$$

□

**Lemma 9** (Bregman Fenchel-Young). Let  $x \in \mathcal{Y}^*$ ,  $y \in \mathcal{Y}$ ,  $y' \in \mathcal{Y}$ . Then, for sufficiently small  $c > 0$  and  $x$  s.t.  $(\nabla \phi)^{-1}[\nabla \phi(y') - cx] \in \mathcal{Y}$ , we have

$$\langle y - y', x \rangle \geq -\frac{1}{c} \left[ D_{\Phi}(y, y') + D_{\Phi^*}(\nabla \phi(y') - cx, \nabla \phi(y')) \right]. \quad (2)$$

For a fixed  $y'$ , this inequality is tight for  $y = \arg \min_v \{ \langle x, v - y' \rangle + \frac{1}{c} D_{\Phi}(v, y') \}$ .

*Proof.* Define  $f(y) := \langle x, y - y' \rangle + \frac{1}{c} D_{\Phi}(y, y')$ . If  $y^* = \arg \min f(y)$ , then,

$$\begin{aligned} \nabla f(y^*) = 0 &\implies \nabla \phi(y^*) = \nabla \phi(y') - cx \\ y^* = (\nabla \phi)^{-1}[\nabla \phi(y') - cx] &\implies y^* = \nabla \phi^*[\nabla \phi(y') - cx] \end{aligned}$$

Note that according to our assumption,  $y^* \in \mathcal{Y}$ . For any  $y$ ,

$$f(y) \geq f(y^*) = \langle x, y^* - y' \rangle + \frac{1}{c} D_{\Phi}(y^*, y') \quad (3)$$

In order to simplify  $D_{\Phi}(y^*, y')$ , we will use the definition of  $\phi^*(z)$ . In particular, for any  $y$ ,

$$\begin{aligned} \phi(y) &= \max_z [\langle z, y \rangle - \phi^*(z)] \quad ; \quad z^* = \arg \max_z [\langle z, y \rangle - \phi^*(z)] \implies y = \nabla \phi^*(z^*) \implies z^* = \nabla \phi(y) \\ \implies \phi(y) &= \langle \nabla \phi(y), y \rangle - \phi^*(\nabla \phi(y)) \end{aligned} \quad (4)$$

$$\begin{aligned} D_{\Phi}(y^*, y') &= \phi(y^*) - \phi(y') - \langle \nabla \phi(y'), y^* - y' \rangle \\ &= [\langle \nabla \phi(y^*), y^* \rangle - \phi^*(\nabla \phi(y^*))] - \phi(y') - \langle \nabla \phi(y'), y^* - y' \rangle \\ &\quad \text{(using Eq. (4) to simplify the first term)} \end{aligned}$$

Let us focus on the first term and simplify it,

$$\begin{aligned} \langle \nabla \phi(y^*), y^* \rangle - \phi^*(\nabla \phi(y^*)) &= \langle \nabla \phi(\nabla \phi^*[\nabla \phi(y') - cx]), \nabla \phi^*[\nabla \phi(y') - cx] \rangle - \phi^*(\nabla \phi(\nabla \phi^*[\nabla \phi(y') - cx])) \\ &= \langle [\nabla \phi(y') - cx], \nabla \phi^*[\nabla \phi(y') - cx] \rangle - \phi^*([\nabla \phi(y') - cx]) \\ &\quad \text{(For any } z, \nabla \phi(\nabla \phi^*(z)) = z) \end{aligned}$$

629 Using the above relations,

$$\begin{aligned}
D_{\Phi}(y^*, y') &= \langle [\nabla\phi(y') - cx], \nabla\phi^*[\nabla\phi(y') - cx] \rangle - \phi^*([\nabla\phi(y') - cx]) - \phi(y') \\
&\quad - \langle \nabla\phi(y'), \nabla\phi^*[\nabla\phi(y') - cx] - y' \rangle \\
&= \langle \nabla\phi(y'), \nabla\phi^*[\nabla\phi(y') - cx] \rangle - c\langle x, \nabla\phi^*[\nabla\phi(y') - cx] \rangle \\
&\quad - \phi^*([\nabla\phi(y') - cx]) - \phi(y') - \langle \nabla\phi(y'), \nabla\phi^*[\nabla\phi(y') - cx] - y' \rangle \\
\implies D_{\Phi}(y^*, y') &= -c\langle x, \nabla\phi^*[\nabla\phi(y') - cx] \rangle - \phi^*([\nabla\phi(y') - cx]) - \phi(y') + \langle \nabla\phi(y'), y' \rangle
\end{aligned}$$

630 Using the above simplification with Eq. (3),

$$\begin{aligned}
f(y) &\geq \langle x, y^* - y' \rangle + \frac{1}{c} [-c\langle x, \nabla\phi^*[\nabla\phi(y') - cx] \rangle - \phi^*([\nabla\phi(y') - cx]) - \phi(y') + \langle \nabla\phi(y'), y' \rangle] \\
&= \langle x, y^* - y' \rangle - \langle x, \nabla\phi^*[\nabla\phi(y') - cx] \rangle - \frac{1}{c} [\phi^*([\nabla\phi(y') - cx]) + \phi(y') - \langle \nabla\phi(y'), y' \rangle] \\
&= -\langle x, y' \rangle + \langle x, \nabla\phi^*[\nabla\phi(y') - cx] \rangle - \langle x, \nabla\phi^*[\nabla\phi(y') - cx] \rangle - \frac{1}{c} [\phi^*([\nabla\phi(y') - cx]) + \phi(y') - \langle \nabla\phi(y'), y' \rangle] \\
&= -\langle x, y' \rangle - \frac{1}{c} [\phi^*([\nabla\phi(y') - cx]) + \phi(y') - \langle \nabla\phi(y'), y' \rangle]
\end{aligned}$$

631 Using Eq. (4),  $\phi(y') = \langle \nabla\phi(y'), y' \rangle - \phi^*(\nabla\phi(y')) \implies \phi(y') - \langle \nabla\phi(y'), y' \rangle = -\phi^*(\nabla\phi(y'))$ ,

$$\begin{aligned}
&\implies f(y) \geq -\langle x, y' \rangle - \frac{1}{c} [\phi^*([\nabla\phi(y') - cx]) - \phi^*(\nabla\phi(y'))] = -\frac{1}{c} [c\langle x, y' \rangle + \phi^*([\nabla\phi(y') - cx]) - \phi^*(\nabla\phi(y'))] \\
&= -\frac{1}{c} \left[ c\langle x, y' \rangle + [\phi^*([\nabla\phi(y') - cx]) - \phi^*(\nabla\phi(y')) - \langle \nabla\phi^*(\nabla\phi(y')), \nabla\phi(y') - cx - \nabla\phi(y') \rangle] \right. \\
&\quad \left. + \langle \nabla\phi^*(\nabla\phi(y')), \nabla\phi(y') - cx - \nabla\phi(y') \rangle \right] \\
&\implies f(y) \geq -\frac{1}{c} [c\langle x, y' \rangle + D_{\Phi}^*(\nabla\phi(y') - cx, \nabla\phi(y')) + \langle y', -cx \rangle] = -\frac{1}{c} D_{\Phi}^*(\nabla\phi(y') - cx, \nabla\phi(y'))
\end{aligned}$$

632 Using the definition of  $f(y)$ ,

$$\begin{aligned}
\langle x, y - y' \rangle + \frac{1}{c} D_{\Phi}(y, y') &\geq -\frac{1}{c} D_{\Phi}^*(\nabla\phi(y') - cx, \nabla\phi(y')) \\
\implies \langle x, y - y' \rangle &\geq -\frac{1}{c} [D_{\Phi}(y, y') + D_{\Phi}^*(\nabla\phi(y') - cx, \nabla\phi(y'))]
\end{aligned}$$

633 □

634 **Lemma 10.** If  $J + \frac{1}{\eta}\Phi$  is convex, then,  $J(\pi)$  is  $\frac{1}{\eta}$ -relatively smooth w.r.t to  $D_{\Phi}$ , and satisfies the following inequality,

$$J(\pi) \geq J(\pi') + \langle \nabla_{\pi} J(\pi'), \pi - \pi' \rangle - \frac{1}{\eta} D_{\Phi}(\pi, \pi')$$

635

636 *Proof.* If  $J + \frac{1}{\eta}\Phi$  is convex,

$$\begin{aligned}
\left( J + \frac{1}{\eta}\phi \right) (\pi) &\geq \left( J + \frac{1}{\eta}\phi \right) (\pi') + \left\langle \pi - \pi', \nabla_{\pi} \left( J + \frac{1}{\eta}\phi \right) (\pi') \right\rangle \\
\implies J(\pi) &\geq J(\pi') + \langle \pi - \pi', \nabla_{\pi} J(\pi') \rangle - \frac{1}{\eta} [\phi(\pi) - \phi(\pi') - \langle \nabla_{\pi}\phi(\pi'), \pi - \pi' \rangle] \\
\implies J(\pi) &\geq J(\pi') + \langle \pi - \pi', \nabla_{\pi} J(\pi') \rangle - \frac{1}{\eta} D_{\Phi}(\pi, \pi')
\end{aligned}$$

637 □

## D Proofs for Sec. 4

**Proposition 2.** For any policy representation and any policy or critic parameterization, there exists a  $(\theta, c)$  pair that makes the RHS of **inequality (I)** strictly positive, and hence guarantees monotonic policy improvement  $(J(\pi_{t+1}) > J(\pi_t))$ , if and only if

$$\langle b_t, \tilde{H}_t^\dagger b_t \rangle > \langle [\nabla J(\pi_t) - \hat{g}_t], \nabla^2 \Phi^*(\nabla \Phi(\pi_t)) [\nabla J(\pi_t) - \hat{g}_t] \rangle,$$

where  $b_t \in \mathbb{R}^n := \sum_{s \in \mathcal{S}} \sum_{a \in \mathcal{A}} [\hat{g}_t]_{s,a} \nabla_\theta [\pi(\theta_t)]_{s,a}$  and  $\tilde{H}_t \in \mathbb{R}^{n \times n} := \nabla_\theta \pi(\theta_t)^\top \nabla_\pi^2 \Phi(\pi_t) \nabla_\theta \pi(\theta_t)$ . For the special case of the tabular policy parameterization, the above condition becomes equal to,

$$\langle \hat{g}_t, [\nabla_\pi^2 \Phi(\pi_t)]^{-1} \hat{g}_t \rangle > \langle [\nabla J(\pi_t) - \hat{g}_t], \nabla^2 \Phi^*(\nabla \Phi(\pi_t)) [\nabla J(\pi_t) - \hat{g}_t] \rangle.$$

*Proof.* As a warmup, let us first consider the tabular parameterization where  $\pi(\theta) = \theta \in \mathbb{R}^{SA}$ . In this case, the lower-bound in Prop. 1 is equal to,

$$J(\pi) - J(\pi_t) \geq \langle \hat{g}_t, \theta - \theta_t \rangle - \left( \frac{1}{\eta} + \frac{1}{c} \right) D_\Phi(\theta, \theta_t) - \frac{1}{c} D_{\Phi^*} \left( \nabla \Phi(\theta_t) - c[\nabla J(\theta_t) - \hat{g}_t], \nabla \Phi(\theta_t) \right)$$

We shall do a second-order Taylor expansion of the critic objective (blue term) in  $c$  around 0 and a second-order Taylor expansion of the actor objective (green term) around  $\theta = \theta_t$ . Defining  $\delta := \nabla J(\theta_t) - \hat{g}_t$ ,

$$\text{RHS} = \langle \hat{g}_t, \theta - \theta_t \rangle - \frac{1}{2} \left( \frac{1}{\eta} + \frac{1}{c} \right) (\theta - \theta_t)^\top [\nabla^2 \Phi(\theta_t)] (\theta - \theta_t) - \frac{c}{2} \langle \delta, \nabla^2 \phi^*(\nabla \phi(\pi_t)) \delta \rangle + o(c) + o(\|\theta - \theta_t\|_2^2),$$

(Using Prop. 20)

where  $o(c)$  and  $o(\|\theta - \theta_t\|_2^2)$  consist of the higher order terms in the Taylor series expansion. A necessary and sufficient condition for monotonic improvement is equivalent to finding a  $(\theta, c)$  such that RHS is positive. As  $c$  tends to 0, the maximizing the RHS is

$$\theta^* = \theta_t + \frac{c\eta}{c + \eta} [\nabla^2 \Phi(\theta_t)]^\dagger \hat{g}_t$$

With this choice,

$$\begin{aligned} \text{RHS} &= \frac{1}{2} \frac{1}{\frac{1}{\eta} + \frac{1}{c}} \langle \hat{g}_t, [\nabla^2 \Phi(\theta_t)]^{-1} \hat{g}_t \rangle - \frac{c}{2} \langle \delta, \nabla^2 \phi^*(\nabla \phi(\pi_t)) \delta \rangle + o(c) \quad (o(\|\theta - \theta_t\|_2^2) \text{ is subsumed by } o(c)) \\ &= \frac{c}{2} \langle \hat{g}_t, [\nabla^2 \Phi(\theta_t)]^{-1} \hat{g}_t \rangle - \frac{c}{2} \langle \delta, \nabla^2 \phi^*(\nabla \phi(\pi_t)) \delta \rangle + \underbrace{\frac{1}{2} \left( \frac{1}{\frac{1}{\eta} + \frac{1}{c}} - c \right) \langle \hat{g}_t, [\nabla^2 \Phi(\theta_t)]^{-1} \hat{g}_t \rangle}_{o(c) \text{ term}} + o(c) \\ &= \frac{c}{2} \langle \hat{g}_t, [\nabla^2 \Phi(\theta_t)]^{-1} \hat{g}_t \rangle - \frac{c}{2} \langle \delta, \nabla^2 \phi^*(\nabla \phi(\pi_t)) \delta \rangle + o(c) \quad (\text{Subsuming the additional } o(c) \text{ term}) \end{aligned}$$

If  $\langle \hat{g}_t, [\nabla^2 \Phi(\theta_t)]^{-1} \hat{g}_t \rangle > \langle \delta, \nabla^2 \phi^*(\nabla \phi(\pi_t)) \delta \rangle$ , i.e. there exists an  $\epsilon > 0$  s.t.  $\langle \hat{g}_t, [\nabla^2 \Phi(\theta_t)]^{-1} \hat{g}_t \rangle = \langle \delta, \nabla^2 \phi^*(\nabla \phi(\pi_t)) \delta \rangle + \epsilon$ , then,  $\text{RHS} = \frac{c\epsilon}{2} + o(c)$ . For any fixed  $\kappa > 0$ , since  $o(c)/c \rightarrow 0$  as  $c \rightarrow 0$ , there exists a neighbourhood  $(0, c_\kappa)$  around zero such that for all  $c$  in this neighbourhood,  $o(c)/c > -\kappa$  and hence  $o(c) > -\kappa c$ . Setting  $\kappa = \frac{\epsilon}{4}$ , there is a  $c$  such that

$$\text{RHS} > \frac{c\epsilon}{4} > 0$$

Hence, there exists a  $c \in (0, \min\{\eta, c_\kappa\})$  such that the RHS is positive, and is hence sufficient to guarantee monotonic policy improvement.

On the other hand, if  $\langle \hat{g}_t, [\nabla^2 \Phi(\theta_t)]^{-1} \hat{g}_t \rangle < \langle \delta, \nabla^2 \phi^*(\nabla \phi(\pi_t)) \delta \rangle$ , i.e. there exists an  $\epsilon > 0$  s.t.  $\langle \hat{g}_t, [\nabla^2 \Phi(\theta_t)]^{-1} \hat{g}_t \rangle = \langle \delta, \nabla^2 \phi^*(\nabla \phi(\pi_t)) \delta \rangle - \epsilon$ , then,  $\text{RHS} = \frac{-c\epsilon}{2} + o(c)$  which can be negative and hence monotonic improvement can not be guaranteed. Hence,  $\langle \hat{g}_t, [\nabla^2 \Phi(\theta_t)]^{-1} \hat{g}_t \rangle > \langle \delta, \nabla^2 \phi^*(\nabla \phi(\pi_t)) \delta \rangle$  is a necessary and sufficient condition for improvement.

Let us now consider the more general case, and define  $m = SA$ ,  $\hat{g}_t \in \mathbb{R}^{m \times 1}$ ,  $\pi(\theta) \in \mathbb{R}^{m \times 1}$  is a function of  $\theta \in \mathbb{R}^{n \times 1}$ . Rewriting Prop. 1,

$$J(\pi) - J(\pi_t) \geq \langle \hat{g}_t, \pi(\theta) - \pi(\theta_t) \rangle - \left( \frac{1}{\eta} + \frac{1}{c} \right) D_\Phi(\pi(\theta), \pi(\theta_t)) - \frac{1}{c} D_{\Phi^*} \left( \nabla \Phi(\pi_t) - c[\nabla J(\pi_t) - \hat{g}_t], \nabla \Phi(\pi_t) \right)$$



As before, we shall do a second-order Taylor expansion of the critic objective (blue term) in  $c$  around 0 and a second-order Taylor expansion of the actor objective (green term) around  $\theta = \theta_t$ . Defining  $\delta := \nabla J(\theta_t) - \hat{g}_t$ . From Prop. 20, we know that,

$$\frac{1}{c} D_{\Phi^*} \left( \nabla \Phi(\pi_t) - c[\nabla J(\pi_t) - \hat{g}_t], \nabla \Phi(\pi_t) \right) = \frac{c}{2} \langle \delta, \nabla^2 \phi^*(\nabla \phi(\pi_t)) \delta \rangle + o(c)$$

In order to calculate the second-order Taylor series expansion of the actor objective, we define  $\nabla_{\theta} \pi(\theta_t) \in \mathbb{R}^{m \times n}$  as the Jacobian of the  $\theta \mapsto \pi$  map, and use  $\nabla_{\theta}[\pi(\theta_t)]_i \in \mathbb{R}^{1 \times n}$  for  $i \in [m]$  to refer to row  $i$

$$\langle \hat{g}_t, \pi(\theta) - \pi(\theta_t) \rangle = \sum_{i=1}^m \underbrace{[\hat{g}_t]_i}_{1 \times 1} \underbrace{\nabla_{\theta}[\pi(\theta_t)]_i}_{1 \times n} \underbrace{(\theta - \theta_t)}_{n \times 1} + \frac{1}{2} \underbrace{(\theta - \theta_t)}_{1 \times n} \left[ \sum_{i=1}^m \underbrace{[\hat{g}_t]_i}_{1 \times 1} \underbrace{\nabla_{\theta}^2[\pi(\theta_t)]_i}_{n \times n} \right] \underbrace{(\theta - \theta_t)}_{n \times 1} + o(\|\theta - \theta_t\|_2^2)$$

where  $o(\|\theta - \theta_t\|_2^2)$  consist of the higher order terms in the Taylor series expansion. For expanding the divergence term, note that  $D_{\Phi}(\pi(\theta), \pi(\theta_t)) = \phi(\pi(\theta)) - \phi(\pi(\theta_t)) - \langle \nabla \phi(\pi(\theta_t)), \pi(\theta) - \pi(\theta_t) \rangle$

$$\begin{aligned} \phi(\pi(\theta)) - \phi(\pi(\theta_t)) &= \underbrace{\nabla_{\pi} \phi(\pi_t)}_{1 \times m} \underbrace{\nabla_{\theta} \pi(\theta_t)}_{m \times n} \underbrace{(\theta - \theta_t)}_{n \times 1} \\ &+ \frac{1}{2} \underbrace{(\theta - \theta_t)}_{1 \times n} \left[ \underbrace{\nabla_{\theta} \pi(\theta_t)}_{n \times m} \underbrace{\nabla_{\pi}^2 \phi(\pi_t)}_{m \times m} \underbrace{\nabla_{\theta} \pi(\theta_t)}_{m \times n} + \sum_{i=1}^m \underbrace{[\nabla_{\pi} \phi(\pi_t)]_i}_{1 \times 1} \underbrace{\nabla_{\theta}^2[\pi(\theta_t)]_i}_{n \times n} \right] \underbrace{(\theta - \theta_t)}_{n \times 1} + o(\|\theta - \theta_t\|_2^2) \end{aligned}$$

$$\langle \nabla \phi(\pi(\theta_t)), \pi(\theta) - \pi(\theta_t) \rangle = \sum_{i=1}^m \underbrace{[\nabla \phi(\pi_t)]_i}_{1 \times 1} \underbrace{[\nabla_{\theta} \pi(\theta_t)]_i}_{1 \times n} \underbrace{(\theta - \theta_t)}_{n \times 1} + \frac{1}{2} \underbrace{(\theta - \theta_t)}_{1 \times n} \left[ \sum_{i=1}^m \underbrace{[\nabla \phi(\pi_t)]_i}_{1 \times 1} \underbrace{\nabla_{\theta}^2[\pi(\theta_t)]_i}_{n \times n} \right] \underbrace{(\theta - \theta_t)}_{n \times 1} + o(\|\theta - \theta_t\|_2^2)$$

Putting everything together,

$$\begin{aligned} \text{RHS} &= \left( \sum_{i=1}^m \underbrace{[\hat{g}_t]_i}_{1 \times 1} \underbrace{\nabla_{\theta}[\pi(\theta_t)]_i}_{1 \times n} \right) \underbrace{(\theta - \theta_t)}_{n \times 1} \\ &+ \frac{1}{2} \underbrace{(\theta - \theta_t)}_{1 \times n} \left[ \sum_{i=1}^m \left( \underbrace{[\hat{g}_t]_i}_{1 \times 1} \underbrace{\nabla_{\theta}^2[\pi(\theta_t)]_i}_{n \times n} \right) - \left( \frac{1}{\eta} + \frac{1}{c} \right) \underbrace{\nabla_{\theta} \pi(\theta_t)}_{n \times m} \underbrace{\nabla_{\pi}^2 \phi(\pi_t)}_{m \times m} \underbrace{\nabla_{\theta} \pi(\theta_t)}_{m \times n} \right] \underbrace{(\theta - \theta_t)}_{n \times 1} \\ &- \frac{c}{2} \langle \delta, \nabla^2 \phi^*(\nabla \phi(\pi_t)) \delta \rangle + o(\|\theta - \theta_t\|_2^2) + o(c) \end{aligned}$$

Defining  $b_t := \sum_{i=1}^m [\hat{g}_t]_i \nabla_{\theta}[\pi(\theta_t)]_i$  and  $H_t := \nabla_{\theta} \pi(\theta_t)^{\top} \nabla_{\pi}^2 \phi(\pi_t) \nabla_{\theta} \pi(\theta_t) - \frac{1}{(\frac{1}{\eta} + \frac{1}{c})} \sum_{i=1}^m ([\hat{g}_t]_i \nabla_{\theta}^2[\pi(\theta_t)]_i)$

$$\text{RHS} = \langle b_t, \theta - \theta_t \rangle + \frac{1}{2} \left( \frac{1}{\eta} + \frac{1}{c} \right) \langle (\theta - \theta_t), H_t (\theta - \theta_t) \rangle - \frac{c}{2} \langle \delta, \nabla^2 \phi^*(\nabla \phi(\pi_t)) \delta \rangle + o(\|\theta - \theta_t\|_2^2) + o(c)$$

As a sanity check, it can be verified that if  $\pi(\theta) = \theta$ ,  $H_t = \left( \frac{1}{\eta} + \frac{1}{c} \right) \nabla^2 \Phi(\theta_t)$  and  $b_t = \hat{g}_t$ , and we recover the tabular result above. Notice that  $\left\langle (\theta - \theta_t), \frac{1}{(\frac{1}{\eta} + \frac{1}{c})} \sum_{i=1}^m ([\hat{g}_t]_i \nabla_{\theta}^2[\pi(\theta_t)]_i) (\theta - \theta_t) \right\rangle$  is  $o(c)$  as  $c$  goes to zero. Subsuming this term in  $o(c)$ ,

$$\text{RHS} = \langle b_t, \theta - \theta_t \rangle + \frac{1}{2} \left( \frac{1}{\eta} + \frac{1}{c} \right) \langle (\theta - \theta_t), \tilde{H}_t (\theta - \theta_t) \rangle - \frac{c}{2} \langle \delta, \nabla^2 \phi^*(\nabla \phi(\pi_t)) \delta \rangle + o(\|\theta - \theta_t\|_2^2) + o(c)$$

where  $\tilde{H}_t := \nabla_{\theta} \pi(\theta_t)^{\top} \nabla_{\pi}^2 \phi(\pi_t) \nabla_{\theta} \pi(\theta_t)$ . As before, a necessary and sufficient condition for monotonic improvement is equivalent to finding a  $(\theta, c)$  such that RHS is positive. As  $c$  tends to 0, the  $\theta$  maximizing the RHS is

$$\theta^* = \theta_t + \frac{c\eta}{(c + \eta)} \left[ \tilde{H}_t \right]^{\dagger} b_t$$

With this choice,

$$\text{RHS} = \frac{1}{2} \frac{1}{\frac{1}{\eta} + \frac{1}{c}} \langle b_t, \left[ \tilde{H}_t \right]^{\dagger} b_t \rangle - \frac{c}{2} \langle \delta, \nabla^2 \phi^*(\nabla \phi(\pi_t)) \delta \rangle + o(c) \quad (o(\|\theta - \theta_t\|_2^2) \text{ is subsumed in } o(c))$$

677 As in the tabular case, since  $\frac{1}{\frac{1}{\eta} + \frac{1}{c}}$  is  $o(c)$ , we can subsume it, and we get that,

$$\text{RHS} = \frac{c}{2} \langle b_t, [\tilde{H}_t]^\dagger b_t \rangle - \frac{c}{2} \langle \delta, \nabla^2 \phi^*(\nabla \phi(\pi_t)) \delta \rangle + o(c)$$

678 Using the same reasoning as in the tabular case above, we can prove that

$$\langle b_t, [\tilde{H}_t]^\dagger b_t \rangle > \langle \delta, \nabla^2 \phi^*(\nabla \phi(\pi_t)) \delta \rangle$$

679 is a necessary and sufficient condition for monotonic policy improvement.

680 □

### 681 D.1 Proof of Prop. 3

682 The following proposition shows the convergence of inexact mirror ascent in the functional space.

683 **Proposition 11.** *Assuming that (i)  $J + \frac{1}{\eta} \Phi$  is convex in  $\pi$ , for a constant  $c > 0$ , after  $T$  iterations of mirror ascent with*  
 684  *$\frac{1}{\eta'} = \frac{2}{\eta} + \frac{2}{c}$  we have*

$$\mathbb{E} \frac{D_\Phi(\bar{\pi}_{\mathcal{R}+1}, \bar{\pi}_{\mathcal{R}})}{\zeta^2} \leq \frac{1}{\zeta T} \left[ [J(\pi^*) - J(\pi_0)] + \frac{1}{c} \sum_{t=0}^{T-1} \mathbb{E} D_{\phi^*} \left( \nabla \phi(\bar{\pi}_t) - c[\nabla J(\bar{\pi}_t) - \hat{g}(\bar{\pi}_t)], \nabla \phi(\bar{\pi}_t) \right) \right]$$

685 where  $\zeta = \eta'/2$  and  $\mathcal{R}$  is picked uniformly random from  $\{0, 1, 2, \dots, T-1\}$ .

686 *Proof.* We divide the mirror ascent (MA) update into two steps:

$$\begin{aligned} \nabla \phi(\tilde{\pi}_{t+1}) &= \nabla \phi(\bar{\pi}_t) + \eta'_t \hat{g}(\bar{\pi}_t) \implies \hat{g}(\bar{\pi}_t) = \frac{1}{\eta'_t} [\nabla \phi(\tilde{\pi}_{t+1}) - \nabla \phi(\bar{\pi}_t)] \\ \bar{\pi}_{t+1} &= \arg \min_{\pi \in \Pi} D_\Phi(\pi, \tilde{\pi}_{t+1}). \end{aligned}$$

687 We denote the above update as  $\bar{\pi}_{t+1} = \text{MA}(\bar{\pi}_t)$ . Using Prop. 1 with  $\pi = \bar{\pi}_{t+1}$ ,  $\pi' = \bar{\pi}_t$ ,

$$\begin{aligned} J(\bar{\pi}_{t+1}) &\geq J(\bar{\pi}_t) + \hat{g}(\bar{\pi}_t)^\top (\bar{\pi}_{t+1} - \bar{\pi}_t) - \underbrace{\left( \left( \frac{1}{\eta} + \frac{1}{c} \right) D_\Phi(\bar{\pi}_{t+1}, \bar{\pi}_t) - \frac{1}{c} D_{\phi^*} \left( \nabla \phi(\bar{\pi}_t) - c[\nabla J(\bar{\pi}_t) - \hat{g}(\bar{\pi}_t)], \nabla \phi(\bar{\pi}_t) \right) \right)}_{:= \epsilon_t^c} \\ &\geq J(\bar{\pi}_t) + \frac{1}{\eta'_t} \langle \nabla \phi(\tilde{\pi}_{t+1}) - \nabla \phi(\bar{\pi}_t), \bar{\pi}_{t+1} - \bar{\pi}_t \rangle - \left( \frac{1}{\eta} + \frac{1}{c} \right) D_\Phi(\bar{\pi}_{t+1}, \bar{\pi}_t) - \epsilon_t^c \quad (\text{Using the update}) \\ &\geq J(\bar{\pi}_t) + \frac{1}{\eta'_t} \{ D_\Phi(\bar{\pi}_{t+1}, \bar{\pi}_t) + D_\Phi(\bar{\pi}_t, \tilde{\pi}_{t+1}) - D_\Phi(\bar{\pi}_{t+1}, \tilde{\pi}_{t+1}) \} - \left( \frac{1}{\eta} + \frac{1}{c} \right) D_\Phi(\bar{\pi}_{t+1}, \bar{\pi}_t) - \epsilon_t^c \\ &\quad \quad \quad (\text{using Lemma 15}) \\ &= J(\bar{\pi}_t) + \frac{1}{\eta'_t} \underbrace{\{ D_\Phi(\bar{\pi}_t, \tilde{\pi}_{t+1}) - D_\Phi(\bar{\pi}_{t+1}, \tilde{\pi}_{t+1}) \}}_{:= A} + \left( \frac{1}{\eta'_t} - \frac{1}{\eta} - \frac{1}{c} \right) D_\Phi(\bar{\pi}_{t+1}, \bar{\pi}_t) - \epsilon_t^c \\ &\geq J(\bar{\pi}_t) + \left( \frac{1}{\eta'_t} - \frac{1}{\eta} - \frac{1}{c} \right) D_\Phi(\bar{\pi}_{t+1}, \bar{\pi}_t) - \epsilon_t^c \quad (A \geq 0 \text{ since } \bar{\pi}_{t+1} \text{ is the projection of } \tilde{\pi}_{t+1} \text{ onto } \Pi) \\ &\geq J(\bar{\pi}_t) + \underbrace{\left( \frac{1}{\eta} + \frac{1}{c} \right)}_{:= \frac{1}{\zeta}} D_\Phi(\bar{\pi}_{t+1}, \bar{\pi}_t) - \epsilon_t^c \quad (\text{Sinc } 1/\eta'_t = 2/\eta + 2/c) \end{aligned}$$

688 Recursing for  $T$  iterations and dividing by  $1/\zeta$ , picking  $\mathcal{R}$  uniformly random from  $\{0, 1, 2, \dots, T-1\}$  and taking expectation  
 689 we get

$$\begin{aligned} \mathbb{E} \frac{D_\Phi(\bar{\pi}_{\mathcal{R}+1}, \bar{\pi}_{\mathcal{R}})}{\zeta^2} &= \frac{1}{\zeta^2 T} \sum_{t=0}^{T-1} \mathbb{E} D_\Phi(\bar{\pi}_{t+1}, \bar{\pi}_t) \\ &\leq \frac{\mathbb{E}[J(\bar{\pi}_T) - J(\pi_0)]}{\zeta T} + \frac{\sum_{t=0}^{T-1} \mathbb{E} \epsilon_t^c}{T} \\ &\leq \frac{[J(\pi^*) - J(\pi_0)]}{\zeta T} + \frac{\sum_{t=0}^{T-1} \mathbb{E} \epsilon_t^c}{T} \\ &= \frac{1}{\zeta T} \left[ [J(\pi^*) - J(\pi_0)] + \frac{1}{c} \sum_{t=0}^{T-1} \mathbb{E} D_{\phi^*} \left( \nabla \phi(\bar{\pi}_t) - c[\nabla J(\bar{\pi}_t) - \hat{g}(\bar{\pi}_t)], \nabla \phi(\bar{\pi}_t) \right) \right] \end{aligned}$$

690 □

691 Compared to Dragomir et al. [15], D’Orazio et al. [12] that analyze stochastic mirror ascent in the smooth, non-convex  
 692 setting, our analysis ensures that the (i) sub-optimality gap (the LHS in the above proposition) is always positive, and (ii)  
 693 uses a different notion of variance that depends on  $D_{\Phi^*}$ .

694 Similar to Vaswani et al. [56], we assume that each  $\pi \in \Pi$  is parameterized by  $\theta$ . In Algorithm 1, we run gradient ascent  
 695 (GA) on  $\ell_t(\theta)$  to compute  $\pi_{t+1} = \pi(\theta_{t+1})$  and interpret the inner loop of Algorithm 1 as an approximation to the projection  
 696 step in the mirror ascent update. We note that  $\ell_t(\theta)$  does not have any additional randomness and is a deterministic function  
 697 w.r.t  $\theta$ . Note that  $\bar{\pi}_{t+1} = \pi(\bar{\theta}_{t+1})$  where  $\pi_t = \pi(\theta_t)$ . Assuming that  $\ell_t(\theta)$  is smooth, and satisfies the PL condition [26], we get the  
 698 following convergence guarantee for Algorithm 1.

699 **Proposition 3.** *For any policy representation and mirror map  $\Phi$  such that (i)  $J + \frac{1}{\eta}\Phi$  is convex in  $\pi$ , any policy  
 700 parameterization such that (ii)  $\ell_t(\theta)$  is smooth w.r.t  $\theta$  and satisfies the Polyak-Lojasiewicz (PL) condition, for  $c > 0$ , after  
 701  $T$  iterations of Algorithm 1 we have that,*

$$\mathbb{E} \left[ \frac{D_\Phi(\bar{\pi}_{\mathcal{R}+1}, \pi_{\mathcal{R}})}{\zeta^2} \right] \leq \frac{1}{\zeta T} \left[ J(\pi^*) - J(\pi_0) + \sum_{t=0}^{T-1} \left( \frac{1}{c} \mathbb{E} D_{\Phi^*} \left( \nabla \Phi(\pi_t) - c \delta_t, \nabla \Phi(\pi_t) \right) + \mathbb{E}[e_t] \right) \right]$$

702 where  $\delta_t := \nabla J(\pi_t) - \hat{g}_t$ ,  $\frac{1}{\zeta} = \frac{1}{\eta} + \frac{1}{c}$ ,  $\mathcal{R}$  is a random variable chosen uniformly from  $\{0, 1, 2, \dots, T-1\}$  and  
 703  $e_t \in \mathcal{O}(\exp(-m_a))$  is the approximation error at iteration  $t$ .

704 *Proof.* For this proof, we define the following notation:

$$\begin{aligned} \pi_t &:= \pi(\theta_t) \\ \ell_t(\theta) &:= J(\pi_t) + \hat{g}(\pi_t)^\top (\pi(\theta) - \pi_t) - \left( \frac{1}{\eta} + \frac{1}{c} \right) D_\Phi(\pi(\theta), \pi_t) \\ \bar{\theta}_{t+1} &:= \arg \max \ell_t(\theta) \\ \bar{\pi}_{t+1} &:= \pi(\bar{\theta}_{t+1}) = \arg \max_{\pi \in \Pi} \{ \langle \hat{g}_t(\pi_t), \pi - \pi_t \rangle - \frac{1}{\eta'} D_\Phi(\pi, \pi_t) \} = \text{MA}(\pi_t) \\ &\quad \text{(Iterate obtained after running 1 step of mirror ascent starting from } \pi_t) \\ \theta_{t+1} &:= \text{GradientAscent}(\ell_t(\theta), \theta_t, m_a) \\ \pi_{t+1} &:= \pi(\theta_{t+1}), \end{aligned}$$

705 where  $\text{GradientAscent}(\ell_t(\theta), \theta_t, m_a)$  means running GradientAscent for  $m_a$  iterations on  $\ell_t(\theta)$  with the initialization  
 706 equal to  $\theta_t$ . Since we assume that  $\ell_t$  satisfies the PL-condition w.r.t.  $\theta$  for all  $t$ , based on the results from Karimi et al. [26],  
 707 we get

$$\ell_t(\bar{\theta}_{t+1}) - \ell_t(\theta_{t+1}) \leq \underbrace{c_1 \exp(-c_2 m_a)}_{:= e_t} (\ell_t(\bar{\theta}_{t+1}) - \ell_t(\theta_t))$$

where  $c_1, c_2$  are problem-dependent constants related to the smoothness and curvature of  $\ell_t$ , and  $e_t$  is the approximation error diminishes as we increase the value of  $m_a$ . Following the same steps as before,

$$\begin{aligned}
J(\pi_{t+1}) &\geq J(\pi_t) + \hat{g}(\pi_t)^\top (\pi(\theta_{t+1}) - \pi_t) - \left(\frac{1}{\eta} + \frac{1}{c}\right) D_\Phi(\pi(\theta_{t+1}), \pi_t) - \epsilon_t && \text{(Using Prop. 1)} \\
&\geq J(\pi_t) + \hat{g}(\pi_t)^\top (\pi(\bar{\theta}_{t+1}) - \pi_t) - \left(\frac{1}{\eta} + \frac{1}{c}\right) D_\Phi(\pi(\bar{\theta}_{t+1}), \pi_t) - \epsilon_t && \text{(Using the above bound for GA)} \\
&= J(\pi_t) + \hat{g}(\pi_t)^\top (\bar{\pi}_{t+1} - \pi_t) - \left(\frac{1}{\eta} + \frac{1}{c}\right) D_\Phi(\bar{\pi}_{t+1}, \pi_t) - e_t - \epsilon_t \\
&\geq J(\pi_t) + \frac{1}{\eta'_t} \langle \nabla \Phi(\bar{\pi}_{t+1}) - \nabla \Phi(\pi_t), \bar{\pi}_{t+1} - \pi_t \rangle - \left(\frac{1}{\eta} + \frac{1}{c}\right) D_\Phi(\bar{\pi}_{t+1}, \pi_t) - \epsilon_t^c - e_t && \text{(Using the MA update)} \\
&\geq J(\pi_t) + \frac{1}{\eta'_t} \{D_\Phi(\bar{\pi}_{t+1}, \pi_t) + D_\Phi(\pi_t, \bar{\pi}_{t+1}) - D_\Phi(\bar{\pi}_{t+1}, \bar{\pi}_{t+1})\} - \left(\frac{1}{\eta} + \frac{1}{c}\right) D_\Phi(\bar{\pi}_{t+1}, \pi_t) - \epsilon_t^c - e_t && \text{(using Lemma 15)} \\
&= J(\pi_t) + \frac{1}{\eta'_t} \underbrace{\{D_\Phi(\pi_t, \bar{\pi}_{t+1}) - D_\Phi(\bar{\pi}_{t+1}, \bar{\pi}_{t+1})\}}_{:=A} + \left(\frac{1}{\eta'_t} - \frac{1}{\eta} - \frac{1}{c}\right) D_\Phi(\bar{\pi}_{t+1}, \pi_t) - \epsilon_t^c - e_t \\
&\geq J(\pi_t) + \left(\frac{1}{\eta'_t} - \frac{1}{\eta} - \frac{1}{c}\right) D_\Phi(\bar{\pi}_{t+1}, \pi_t) - \epsilon_t^c - e_t && (A \geq 0 \text{ since } \bar{\pi}_{t+1} \text{ is the projection of } \tilde{\pi}_{t+1} \text{ into the simplex)} \\
&\geq J(\pi_t) + \underbrace{\left(\frac{1}{\eta} + \frac{1}{c}\right)}_{:=\frac{1}{\zeta}} D_\Phi(\bar{\pi}_{t+1}, \pi_t) - \epsilon_t^c - e_t && (\text{setting } \eta'_t \text{ s.t. } 1/\eta'_t \geq 2/\eta + 2/c)
\end{aligned}$$

Recusing for  $T$  iterations and dividing by  $1/\zeta$ , picking  $\mathcal{R}$  uniformly random from  $\{0, 1, 2, \dots, T-1\}$  and taking expectation we get

$$\begin{aligned}
\mathbb{E} \frac{D_\Phi(\bar{\pi}_{\mathcal{R}+1}, \pi_{\mathcal{R}})}{\zeta^2} &= \frac{1}{\zeta^2 T} \sum_{t=0}^{T-1} \mathbb{E} D_\Phi(\bar{\pi}_{t+1}, \pi_t) \\
&\leq \frac{\mathbb{E}[J(\pi_T) - J(\pi_0)]}{\zeta T} + \frac{\sum_{t=0}^{T-1} \mathbb{E} \epsilon_t^c}{\zeta T} + \frac{\sum_{t=0}^{T-1} \mathbb{E} e_t}{\zeta T} \\
&\leq \frac{[J(\pi^*) - J(\pi_0)]}{\gamma T} + \frac{\sum_{t=0}^{T-1} \mathbb{E} \epsilon_t^c}{\gamma T} + \frac{\sum_{t=0}^{T-1} \mathbb{E} e_t}{\gamma T} \\
\implies \mathbb{E} \frac{D_\Phi(\bar{\pi}_{\mathcal{R}+1}, \pi_{\mathcal{R}})}{\zeta^2} &\leq \frac{1}{\zeta T} \left[ [J(\pi^*) - J(\pi_0)] + \frac{1}{c} \sum_{t=0}^{T-1} \mathbb{E} D_{\Phi^*} \left( \nabla \Phi(\pi_t) - c[\nabla J(\pi_t) - \hat{g}(\pi_t)], \nabla \Phi(\pi_t) \right) + \sum_{t=0}^{T-1} \mathbb{E} e_t \right]
\end{aligned}$$

□

Note that it is possible to incorporate a sampling error (in the distribution  $d^\pi$  across states) for the actor update in Algorithm 1. This corresponds to an additional error in calculating  $D_\Phi$ , and we can use the techniques from Lavington et al. [30] to characterize the convergence in this case.

## D.2 Exact setting with Lifting (Direct representation)

Recall the mirror ascent update in the functional space.

$$\bar{\pi}_{t+1} = \arg \max_{\pi \in \Pi} \left[ J(\pi_t) + \nabla J(\pi_t)^\top (\pi - \pi_t) - \frac{1}{\eta'_t} D_\Phi(\pi, \pi_t) \right],$$

718 For the direct representation, we define  $\pi^s := p^\pi(\cdot|s)$ ,  $\hat{g}(\pi_t)(s, \cdot) = d^{\pi_t}(s) Q^{\pi_t}(s, \cdot)$  and  $D_\Phi(\pi, \pi_t) =$   
 719  $\sum_s d^{\pi_t}(s) D_\Phi(\pi^s, \pi_t^s)$ . Rewriting the MA update,

$$\begin{aligned} \bar{\pi}_{t+1} &= \arg \max_{\{\pi^s \in \Delta_A\}_{s \in \mathcal{S}}} \left[ J(\pi_t) + \sum_s d^{\pi_t}(s) \left[ \langle Q^{\pi_t}(s, \cdot), \pi^s - \pi_t^s \rangle - \frac{1}{\eta'_t} D_\Phi(\pi^s, \pi_t^s) \right] \right] \\ \implies \bar{\pi}_{t+1}^s &= \arg \max_{\pi^s \in \Delta_A} \left[ \langle Q^{\pi_t}(s, \cdot), \pi^s - \pi_t^s \rangle - \frac{1}{\eta'_t} D_\Phi(\pi^s, \pi_t^s) \right] \quad (\text{Can decompose across states since } d^{\pi_t}(s) \geq 0) \end{aligned}$$

720 For each state  $s$  and  $Q^{\pi_t}(s, \cdot)$  we define the set  $\Pi_t^s = \{\pi^s : \pi^s \in \arg \max_{\pi^s \in \Delta_A} \langle Q^{\pi_t}(s, \cdot), \pi^s \rangle\}$  i.e. a set of greedy  
 721 policies w.r.t.  $Q^{\pi_t}(s, \cdot)$ . Similar to Johnson et al. [23] we define  $\eta'_t$  as follows

$$\eta'_t \geq \frac{1}{c_t} \max_s \left\{ \min_{\pi \in \Pi_t^s} D_\Phi(\pi, \pi_t) \right\} \quad (5)$$

722 where  $c_t > 0$  is a constant. Now we consider the policy parameterization,  $\pi = \pi(\theta)$ . We assume that the mapping from  
 723  $\theta \rightarrow \pi$  is  $L_\pi$  Lipschitz continuous.

$$\begin{aligned} \ell_t(\theta) &:= J(\pi_t) + \sum_s d^{\pi_t}(s) \left[ \langle Q^{\pi_t}(s, \cdot), \pi(\theta)^s - \pi_t^s \rangle - \frac{1}{\eta'_t} D_\Phi(\pi(\theta)^s, \pi_t^s) \right] \\ \tilde{\theta}_{t+1} &:= \arg \max_{\theta} \ell_t(\theta) \\ \theta_{t+1} &:= \text{GradientAscent}(\ell_t(\theta), \theta_t, m) \\ \tilde{\pi}_{t+1} &:= \pi(\tilde{\theta}_{t+1}) \\ \pi_{t+1} &:= \pi(\theta_{t+1}) \end{aligned}$$

724  $\text{GradientAscent}(\ell_t(\theta), \theta_t, m)$  means that we run gradient ascent for  $m$  iterations to maximize  $\ell_t$  with  $\theta_t$  as the initial value.  
 725 We assume that  $\ell_t$  satisfies Restricted Secant Inequality (RSI) and is smooth w.r.t.  $\theta$ . Based on the convergence property of  
 726 Gradient Ascent for RSI and smooth functions [26], we have:

$$\begin{aligned} \left\| \tilde{\theta}_{t+1} - \theta_{t+1} \right\|_2^2 &\leq \mathcal{O}(\exp(-m)) \\ \implies \left\| \tilde{\pi}_{t+1} - \pi_{t+1} \right\|_2^2 &= \left\| \pi(\tilde{\theta}_{t+1}) - \pi(\theta_{t+1}) \right\|_2^2 \leq L_\pi^2 \left\| \tilde{\theta}_{t+1} - \theta_{t+1} \right\|_2^2 \leq \underbrace{e_t^2 := \mathcal{O}(\exp(-m))}_{\text{approximation error}} \\ &\quad (\text{since } \pi(\theta) \text{ is Lipschitz continuous}) \end{aligned}$$

727 Furthermore, we assume that  $\left\| \bar{\pi}_{t+1} - \tilde{\pi}_{t+1} \right\|_2^2 \leq b_t^2$  for all  $t$  which represents the bias because of the function approximation.  
 728 Before stating the main proposition of this section, we restate Johnson et al. [23, Lemma 2].

729 **Lemma 12** (Lemma 2 of Johnson et al. [23]). *For all  $(s, a) \in \mathcal{S} \times \mathcal{A}$  we have*

$$Q^{\bar{\pi}_{t+1}}(s, a) \geq Q^{\pi_t}(s, a).$$

730 Now we state the main proposition of this part.

731 **Proposition 13** (Convergence of tabular MDP with Lifting). *Assume that (i)  $\ell_t(\theta)$  is smooth and satisfies RSI condition,*  
 732 *(ii)  $\pi(\theta)$  is  $L_\pi$ -Lipschitz continuous, (iii) the bias is bounded for all  $t$  i.e.  $\left\| \bar{\pi}_{t+1} - \tilde{\pi}_{t+1} \right\|_2^2 \leq b_t^2$ , (iv)  $\|Q^\pi(s, \cdot)\| \leq q$  for all*  
 733  *$\pi$  and  $s$ . By setting  $\eta'_t$  as in Eq. (5) and running Gradient Ascent for  $m$  iterations to maximize  $\ell_t$  we have*

$$\|J(\pi^*) - J(\pi_T)\|_\infty \leq \gamma^T \left( \|J(\pi^*) - J(\pi_0)\|_\infty + \sum_{t=1}^T \gamma^{-t} \left( c_t + \frac{q}{1-\gamma} [e_t + b_t] \right) \right)$$

734 where  $\pi^*$  is the optimal policy,  $\pi^{*s}$  refers to the optimal action in state  $s$ . Here,  $e_t = \mathcal{O}(\exp(-m))$  is the approximation  
 735 error.

736 *Proof.* This proof is mainly based on the proof of Theorem 3 of Johnson et al. [23]. Using Lemma 12 and the fact that  
 737  $\pi^s \geq 0$ , we have  $\langle Q^{\pi_t}(s, \cdot), \bar{\pi}_{t+1}^s \rangle \leq \langle Q^{\bar{\pi}_{t+1}}(s, \cdot), \bar{\pi}_{t+1}^s \rangle = J_s(\bar{\pi}_{t+1})$ . Using this inequality we get,

$$\begin{aligned} \langle Q^{\pi_t}(s, \cdot), \pi^{*s} - \bar{\pi}_{t+1}^s \rangle &\geq \langle Q^{\pi_t}(s, \cdot), \pi^{*s} \rangle - J_s(\bar{\pi}_{t+1}) \\ &= \langle Q^{\pi_t}(s, \cdot) - Q^{\pi^*}(s, \cdot), \pi^{*s} \rangle + \langle Q^{\pi^*}(s, \cdot), \pi^{*s} \rangle - J_s(\bar{\pi}_{t+1}) \\ &\geq - \left\| Q^{\pi_t}(s, \cdot) - Q^{\pi^*}(s, \cdot) \right\|_\infty + J_s(\pi^*) - J_s(\bar{\pi}_{t+1}) \quad (\text{Holder's inequality}) \\ &\geq -\gamma \|J(\pi_t) - J(\pi^*)\|_\infty + J_s(\pi^*) - J_s(\bar{\pi}_{t+1}) \end{aligned}$$



738 The last inequality is from the definition of  $Q$  and  $J$  as follows. For any action  $a$ ,

$$\begin{aligned} Q^{\pi_t}(s, a) - Q^{\pi^*}(s, a) &= \gamma \sum_{s'} P(s'|s, a) [J_{s'}(\pi_t) - J_{s'}(\pi^*)] \\ &\leq \gamma \sum_{s'} P(s'|s, a) \|J(\pi_t) - J(\pi^*)\|_\infty \\ &\leq \gamma \|J(\pi_t) - J(\pi^*)\|_\infty \end{aligned}$$

739 From the above inequality,

$$\begin{aligned} -\gamma \|J(\pi_t) - J(\pi^*)\|_\infty + J_s(\pi^*) - J_s(\bar{\pi}_{t+1}) &\leq \langle Q^{\pi_t}(s, \cdot), \pi^{*s} - \bar{\pi}_{t+1}^s \rangle \\ &\leq \langle Q^{\pi_t}(s, \cdot), p_t^s - \bar{\pi}_{t+1}^s \rangle && \text{(For any } p_t^s \in \Pi_t^s) \\ &\leq \frac{D_\phi(p_t^s, \pi_t^s) - D_\phi(p_t^s, \bar{\pi}_{t+1}^s) - D_\phi(\bar{\pi}_{t+1}^s, \pi_t^s)}{\eta'_t} \\ &\quad \text{(Using Lemma 16 with } d = Q^{\pi_t}(s, \cdot), y = \bar{\pi}_{t+1}^s, x = p_t^s) \\ &\leq \frac{D_\phi(p_t^s, \pi_t^s)}{\eta'_t} \\ \implies -\gamma \|J(\pi_t) - J(\pi^*)\|_\infty + J_s(\pi^*) - J_s(\bar{\pi}_{t+1}) &\leq \min_{p_t^s \in \Pi_t^s} \frac{D_\phi(p_t^s, \pi_t^s)}{\eta'_t} \leq c_t \\ &\quad \text{(Based on the definition of } \eta' \text{ in Eq. (5))} \\ \implies -\gamma \|J(\pi_t) - J(\pi^*)\|_\infty + J_{s'}(\pi^*) - J_{s'}(\pi_{t+1}) &\leq c_t + J_{s'}(\bar{\pi}_{t+1}) - J_{s'}(\pi_{t+1}) \\ &\quad \text{(Since } s \text{ is an arbitrary state, changing } s = s' \text{ for convenience)} \\ &= c_t + \frac{1}{1-\gamma} \sum_s d^{\bar{\pi}_{t+1}}(s) \langle Q^{\pi_{t+1}}(s, \cdot), \bar{\pi}_{t+1}^s - \pi_{t+1}^s \rangle \\ &\quad \text{(Using performance difference lemma 17 with the starting state equal to } s') \\ &\leq c_t + \frac{1}{1-\gamma} \sum_s d^{\bar{\pi}_{t+1}}(s) \|Q^{\pi_{t+1}}(s, \cdot)\| \|\bar{\pi}_{t+1}^s - \pi_{t+1}^s\| \\ &\quad \text{(Cauchy Schwartz)} \\ &\leq c_t + \frac{q}{1-\gamma} \sum_s d^{\bar{\pi}_{t+1}}(s) \|\bar{\pi}_{t+1}^s - \pi_{t+1}^s\| \\ &\leq c_t + \frac{q}{1-\gamma} \sum_s d^{\bar{\pi}_{t+1}}(s) [\|\bar{\pi}_{t+1}^s - \tilde{\pi}_{t+1}^s\| + \|\tilde{\pi}_{t+1}^s - \pi_{t+1}^s\|] \\ &\leq c_t + \frac{q}{1-\gamma} (e_t + b_t) \end{aligned}$$

740 Since the above equation is true for all  $s'$  we have:

$$\|J(\pi^*) - J(\pi_{t+1})\|_\infty \leq \gamma \|J(\pi_t) - J(\pi^*)\|_\infty + c_t + \frac{q}{1-\gamma} (e_t + b_t)$$

741 Recursing for  $T$  iterations we get:

$$\|J(\pi^*) - J(\pi_T)\|_\infty \leq \gamma^T \left( \|J(\pi^*) - J(\pi_0)\|_\infty + \sum_{t=1}^T \gamma^{-t} (c_t + \frac{q}{1-\gamma} [e_t + b_t]) \right)$$

742 □

743 We can control the approximation error  $e_t$  by using a larger  $m$ . The bias term  $b_t$  can be small if our function approximation  
 744 model is expressive enough.  $c_t$  is an arbitrary value and if we set  $c_t = \gamma^t c$  for some constant  $c > 0$ , then  $\sum_{t=1}^T \gamma^{-t} (c_t) =$   
 745  $Tc$  and therefore  $\gamma^T Tc$  can diminish linearly. The above analysis relied on the knowledge of the true  $Q$  functions, but can  
 746 be easily extended to using inexact estimates of  $Q^\pi$  by using the techniques developed in [60, 23].

### 747 D.3 Exact setting with lifting trick (Softmax representation)

748 In the softmax representation in the tabular MDP, we consider the case that  $\pi$  is parameterized with parameter  $\theta \in \mathcal{R}^n$ . In  
 749 this setting  $\Phi$  is the Euclidean norm. Using Prop. 1, for  $\eta$  such that  $J + \frac{1}{\eta}\phi$  is convex we have for a given  $\pi_t$ ,

$$\begin{aligned} J(\pi) &\geq J(\pi_t) + \langle \nabla J(\pi_t), \pi - \pi_t \rangle - \frac{1}{\eta} D_\Phi(\pi, \pi_t) \\ &= J(\pi_t) + \underbrace{\langle \nabla J(\pi_t), \pi - \pi_t \rangle - \frac{1}{2\eta} \|\pi - \pi_t\|_2^2}_{:=h(\pi)} \end{aligned} \quad (\text{Since } \phi(\cdot) = \frac{1}{2} \|\cdot\|_2^2)$$

750 If we maximize  $h(\pi)$  w.r.t.  $\pi$  we get

$$\bar{\pi}_{t+1} = \arg \max_{\pi} \{h(\pi)\} \implies \bar{\pi}_{t+1} = \pi_t + \eta \nabla_{\pi} J(\pi_t)$$

751 [36, Lemma 8] proves that  $J(\pi)$  satisfies a gradient domination condition w.r.t the softmax representation. In particular, if  
 752  $\alpha^*(s)$  is the optimal action in state  $s$  and  $\mu := \min_{\pi} \frac{\min_s p^{\pi}(\alpha^*(s)|s)}{\sqrt{S} \left\| \frac{d\pi^*}{d\pi} \right\|_{\infty}}$ , they prove that for all  $\pi$ ,

$$\|\nabla_{\pi} J(\pi)\| \geq \mu [J(\pi^*) - J(\pi)]$$

753 Consider optimization in the parameter space where  $\ell_t(\theta) := J(\pi_t) + \langle \nabla J(\pi_t), \pi(\theta) - \pi_t \rangle - \frac{1}{\eta} D_\Phi(\pi(\theta), \pi_t)$ .

$$\tilde{\theta}_{t+1} := \arg \max_{\theta} \ell_t(\theta)$$

$$\tilde{\pi}_{t+1} = \pi(\tilde{\theta}_{t+1})$$

$$\theta_{t+1} := \text{GradientAscent}(\ell_t, \theta_t, m)$$

$$\pi_{t+1} = \pi(\theta_{t+1})$$

754  $\text{GradientAscent}(\ell_t(\theta), \theta_t, m)$  means that we run gradient ascent for  $m$  iterations to maximize  $\ell_t$  with  $\theta_t$  as the initial value.  
 755 Assuming that  $\ell_t$  is Lipschitz smooth w.r.t.  $\theta$  and satisfies the Polyak-Lojasiewicz (PL) condition, we use the gradient  
 756 ascent property for PL functions [26] to obtain,

$$h(\tilde{\pi}_{t+1}) - h(\pi_{t+1}) = \ell_t(\tilde{\theta}_{t+1}) - \ell_t(\theta_{t+1}) \leq \underbrace{e_t}_{\text{approximation error}} := O(\exp(-m))$$

757

758 **Proposition 14** (Convergence of softmax+tabular setting with Lifting). Assume (i)  $J + \frac{1}{\eta}\phi$  is convex, (ii)  $J$  satisfies gradient  
 759 domination property above with  $\mu > 0$ , (iii)  $\ell_t(\theta)$  is Lipschitz smooth and satisfies PL condition, (iv)  $|h(\bar{\pi}_{t+1}) - h(\tilde{\pi}_{t+1})| \leq$   
 760  $b_t$  for all  $t$ . Then after running Gradient Ascent for  $m$  iterations to maximize  $\ell_t$  we have

$$\min_{t \in [T-1]} [J(\pi^*) - J(\pi_t)] \leq \sqrt{\frac{J(\pi^*) - J(\pi_0) + \sum_{t=0}^{T-1} [e_t + b_t]}{\alpha T}}$$

761 where  $\alpha := \frac{\eta\mu^2}{2}$  and  $e_t$  is the approximation error at iteration  $t$  and  $[T-1] := \{0, 1, 2, \dots, T-1\}$ .

762 *Proof.* Since  $J + \frac{1}{\eta}\phi$  is convex,

$$\begin{aligned} J(\pi_{t+1}) &\geq h(\pi_{t+1}) = J(\pi_t) + \langle \nabla J(\pi_t), \pi_{t+1} - \pi_t \rangle - \frac{1}{2\eta} \|\pi_{t+1} - \pi_t\|_2^2 \\ &\geq h(\tilde{\pi}_{t+1}) - e_t && (\text{Using the GA bound from above}) \\ &\geq h(\bar{\pi}_{t+1}) - e_t - b_t = J(\pi_t) + \langle \nabla J(\pi_t), \bar{\pi}_{t+1} - \pi_t \rangle - \frac{1}{2\eta} \|\bar{\pi}_{t+1} - \pi_t\|_2^2 - e_t - b_t \\ &\geq J(\pi_t) + \frac{\eta}{2} \|\nabla_{\pi} J(\pi_t)\|_2^2 - e_t - b_t && (\text{Since } \bar{\pi}_{t+1} = \pi_t + \eta \nabla_{\pi} J(\pi_t)) \\ &\geq J(\pi_t) + \frac{\eta\mu^2}{2} [J(\pi^*) - J(\pi_t)]^2 - e_t - b_t && (\text{Using gradient domination of } J) \\ \implies J(\pi^*) - J(\pi_{t+1}) &\leq \underbrace{J(\pi^*) - J(\pi_t)}_{:=\delta_t} - \underbrace{\frac{\eta\mu^2}{2}}_{:=\alpha} [J(\pi^*) - J(\pi_t)]^2 + e_t + b_t \\ \implies \delta_{t+1} &\leq \delta_t - \alpha\delta_t^2 + e_t + b_t \\ \implies \alpha\delta_t^2 &\leq \delta_t - \delta_{t+1} + e_t + b_t \end{aligned}$$

763 Summing up for  $T$  iterations and dividing both sides by  $T$

$$\begin{aligned}
\alpha \min_{t \in [T-1]} \delta_t^2 &\leq \frac{1}{T} \alpha \sum_{t=0}^{T-1} \delta_t^2 \\
&\leq \frac{1}{T} [\delta_0 - \delta_{T+1}] + \frac{1}{T} \sum_{t=0}^{T-1} [e_t + b_t] \leq \frac{1}{T} [\delta_0] + \frac{1}{T} \sum_{t=0}^{T-1} [e_t + b_t] \\
&\implies \min_{t \in [T-1]} \delta_t \leq \sqrt{\frac{\delta_0 + \sum_{t=0}^{T-1} [e_t + b_t]}{\alpha T}}
\end{aligned}$$

764

□

765 The above analysis relied on the knowledge of the exact gradient  $\nabla J(\pi)$ , but can be easily extended to using inexact  
766 estimates of the gradient by using the techniques developed in [62].

#### 767 D.4 Helper Lemmas

768 **Lemma 15** (3-Point Bregman Property). *For  $x, y, z \in \mathcal{X}$ ,*

$$\langle \nabla \phi(z) - \nabla \phi(y), z - x \rangle = D_{\Phi}(x, z) + D_{\Phi}(z, y) - D_{\Phi}(x, y)$$

769 **Lemma 16** (3-Point Descent Lemma for Mirror Ascent). *For any  $z \in \text{rint dom } \phi$ , and a vector  $d$ , let*

$$y = \arg \max_{x \in \mathcal{X}} \left\{ \langle d, x \rangle - \frac{1}{\eta} D_{\Phi}(x, z) \right\}.$$

770 *Then  $y \in \text{rint dom } \phi$  and for any  $x \in \mathcal{X}$*

$$\langle d, y - x \rangle \geq \frac{1}{\eta} [D_{\Phi}(y, z) + D_{\Phi}(x, y) - D_{\Phi}(x, z)]$$

771 **Lemma 17** (Performance Difference Lemma [25]). *For any  $\pi, \pi' \in \Pi$ ,*

$$J(\pi) - J(\pi') = \frac{1}{1 - \gamma} \mathbb{E}_{s \sim d^{\pi}} \left[ \langle Q^{\pi'}(s, \cdot), p^{\pi}(\cdot | s) - p^{\pi'}(\cdot | s) \rangle \right]$$

772

## E Proofs for Sec. 5

**Proposition 18** (State-wise lower bound). *For (i) any representation  $\pi$  that is separable across states i.e. there exists  $\pi^s \in R^A$  such that  $\pi_{s,a} = [\pi^s]_a$ , (ii) any strictly convex mirror map  $\Phi$  that induces a Bregman divergence that is separable across states i.e.  $D_\Phi(\pi, \pi') = \sum_s d^\pi(s) D_\phi(\pi^s, \pi'^s)$ , (iii) any  $\eta$  such that  $J + \frac{1}{\eta}\Phi$  is convex, if (iv)  $\nabla J(\pi)$  is separable across states i.e.  $[\nabla J(\pi)]_{s,a} = d^\pi(s) [\nabla_{\pi^s} J(\pi)]_a$  where  $\nabla_{\pi^s} J(\pi) \in \mathbb{R}^A$ , then (v) for any separable (across states) gradient estimator  $\hat{g}$  i.e.  $[\hat{g}(\pi)]_{s,a} = d^\pi(s) [\hat{g}^s(\pi)]_a$  where  $\hat{g}^s(\pi) \in \mathbb{R}^A$ , and  $c \in (0, \infty)^S$ ,*

$$J(\pi) \geq J(\pi_t) + \langle \hat{g}(\pi_t), (\pi - \pi_t) \rangle - \sum_s d^{\pi_t}(s) \left( \frac{1}{\eta} + \frac{1}{c_s} \right) D_\phi(\pi^s, \pi_t^s) - \sum_s \frac{d^{\pi_t}(s) D_{\phi^*}(\nabla \phi(\pi_t^s) - c_s \delta_t^s, \nabla \phi(\pi_t^s))}{c_s}$$

*Proof.* Using condition (iii) of the proposition with Lemma 10,

$$\begin{aligned} J(\pi) &\geq J(\pi_t) + \langle \nabla J(\pi_t), \pi - \pi_t \rangle - \frac{1}{\eta} D_\phi(\pi, \pi_t) \\ &= J(\pi_t) + \langle \hat{g}(\pi_t), \pi - \pi_t \rangle + \langle \nabla J(\pi_t) - \hat{g}(\pi_t), \pi - \pi_t \rangle - \frac{1}{\eta} D_\phi(\pi, \pi_t) \end{aligned}$$

Using conditions (iv) and (v), we know that  $[\nabla J(\pi_t)]_{s,a} = d^{\pi_t}(s) [\nabla_{\pi^s} J(\pi_t)]_a$  and  $[\hat{g}(\pi_t)]_{s,a} = d^{\pi_t}(s) [\hat{g}^s(\pi_t)]_a$ . Defining  $\delta_t^s := \nabla_{\pi^s} J(\pi_t) - \hat{g}^s(\pi_t) \in \mathbb{R}^A$ . Using conditions (i) and (ii), we can rewrite the lower-bound as follows,

$$\begin{aligned} J(\pi) &\geq J(\pi_t) + \langle \hat{g}(\pi_t), (\pi - \pi_t) \rangle + \sum_s d^{\pi_t}(s) \langle \delta_t^s, \pi^s - \pi_t^s \rangle - \frac{1}{\eta} \sum_s d^{\pi_t}(s) D_\phi(\pi^s, \pi_t^s) \\ &= J(\pi_t) + \langle \hat{g}(\pi_t), \pi - \pi_t \rangle + \sum_s d^{\pi_t}(s) \left[ \langle \delta_t^s, \pi^s - \pi_t^s \rangle - \frac{1}{\eta} D_\phi(\pi^s, \pi_t^s) \right] \end{aligned}$$

Using Lemma 9 with  $x = \delta_t^s$ ,  $y = \pi^s$  and  $y' = \pi_t^s$ ,

$$\begin{aligned} &\geq J(\pi_t) + \langle \hat{g}(\pi_t), \pi - \pi_t \rangle - \sum_s d^{\pi_t}(s) \left[ \frac{D_{\phi^*}(\nabla \phi(\pi_t^s) - c_s \delta_t^s, \nabla \phi(\pi_t^s))}{c_s} + \left( \frac{1}{\eta} + \frac{1}{c_s} \right) D_\phi(\pi^s, \pi_t^s) \right] \\ J(\pi) &\geq J(\pi_t) + \langle \hat{g}(\pi_t), \pi - \pi_t \rangle - \sum_s d^{\pi_t}(s) \left( \frac{1}{\eta} + \frac{1}{c_s} \right) D_\phi(\pi^s, \pi_t^s) - \sum_s \frac{d^{\pi_t}(s) D_{\phi^*}(\nabla \phi(\pi_t^s) - c_s \delta_t^s, \nabla \phi(\pi_t^s))}{c_s} \end{aligned}$$

□

**Proposition 4.** *For the direct representation and negative entropy mirror map,  $c > 0$ ,  $\eta \leq \frac{(1-\gamma)^3}{2\gamma|A|}$ ,*

$$\begin{aligned} J(\pi) - J(\pi_t) &\geq C + \mathbb{E}_{s \sim d^{\pi_t}} \left[ \mathbb{E}_{a \sim p^{\pi_t}(\cdot|s)} \left[ \frac{p^\pi(a|s)}{p^{\pi_t}(a|s)} \left( \hat{Q}^{\pi_t}(s, a) - \left( \frac{1}{\eta} + \frac{1}{c} \right) \log \left( \frac{p^\pi(a|s)}{p^{\pi_t}(a|s)} \right) \right) \right] \right] \\ &\quad - \mathbb{E}_{s \sim d^{\pi_t}} \left[ \mathbb{E}_{a \sim p^{\pi_t}(\cdot|s)} [Q^{\pi_t}(s, a) - \hat{Q}^{\pi_t}(s, a)] + \frac{1}{c} \log \left( \mathbb{E}_{a \sim p^{\pi_t}(\cdot|s)} \left[ \exp \left( -c [Q^{\pi_t}(s, a) - \hat{Q}^{\pi_t}(s, a)] \right) \right] \right) \right] \end{aligned}$$

where  $C$  is a constant and  $\hat{Q}^{\pi_t}$  is the estimate of the action-value function for policy  $\pi_t$ .

*Proof.* For the direct representation,  $\pi_{s,a} = p^\pi(a|s)$ . Using the policy gradient theorem,  $[\nabla_{\pi} J(\pi)]_{s,a} = d^\pi(s) Q^\pi(s, a)$ . We choose  $\hat{g}(\pi)$  such that  $[\hat{g}(\pi)]_{s,a} = d^\pi(s) \hat{Q}^\pi(s, a)$  as the estimated gradient. Using [56, Proposition 2],  $J + \frac{1}{\eta}\Phi$  is convex for  $\eta \leq \frac{(1-\gamma)^3}{2\gamma|A|}$ . Defining  $\delta_t^s := \nabla_{\pi^s} J(\pi_t) - \hat{g}^s(\pi_t) = Q^{\pi_t}(s, \cdot) - \hat{Q}^{\pi_t}(s, \cdot) \in \mathbb{R}^A$ , and using Prop. 18 with  $c_s = c$  for all  $s$ ,

$$J(\pi) \geq J(\pi_t) + \langle \hat{g}(\pi_t), \pi - \pi_t \rangle - \sum_s d^{\pi_t}(s) \left( \frac{1}{\eta} + \frac{1}{c} \right) D_\phi(\pi^s, \pi_t^s) - \sum_s \frac{d^{\pi_t}(s) D_{\phi^*}(\nabla \phi(\pi_t^s) - c \delta_t^s, \nabla \phi(\pi_t^s))}{c}$$

Since  $\phi(\pi^s) = \phi(p^\pi(\cdot|s)) = \sum_a p^\pi(a|s) \log(p^\pi(a|s))$ , using Lemma 27,  $D_\phi(\pi^s, \pi_t^s) = \text{KL}(p^\pi(\cdot|s) || p^{\pi_t}(\cdot|s))$ . Hence,

$$\begin{aligned} J(\pi) &\geq J(\pi_t) + \sum_s d^{\pi_t}(s) \sum_a \hat{Q}^{\pi_t}(s, a) [p^\pi(a|s) - p^{\pi_t}(a|s)] - \left( \frac{1}{\eta} + \frac{1}{c} \right) \sum_s d^{\pi_t}(s) \text{KL}(p^\pi(\cdot|s) || p^{\pi_t}(\cdot|s)) \\ &\quad - \sum_s \frac{d^{\pi_t}(s) D_{\phi^*}(\nabla \phi(\pi_t^s) - c \delta_t^s, \nabla \phi(\pi_t^s))}{c} \end{aligned}$$

Using Lemma 24 to simplify the last term,

$$\begin{aligned}
& \sum_s \frac{d^{\pi_t}(s) D_{\phi^*}(\nabla \phi(\pi_t^s) - c \delta_t^s, \nabla \phi(\pi_t^s))}{c} \\
&= \frac{1}{c} \left[ \sum_s d^{\pi_t}(s) \left[ c \langle p^{\pi_t}(\cdot|s), \delta_t^s \rangle + \log \left( \sum_a p^{\pi_t}(a|s) \exp(-c \delta_t^s[a]) \right) \right] \right] \\
&= \sum_s d^{\pi_t}(s) \left[ \sum_a p^{\pi_t}(a|s) [Q^{\pi_t}(s, a) - \hat{Q}^{\pi_t}(s, a)] + \frac{1}{c} \log \left( \sum_a p^{\pi_t}(a|s) \exp(-c [Q^{\pi_t}(s, a) - \hat{Q}^{\pi_t}(s, a)]) \right) \right]
\end{aligned}$$

Putting everything together,

$$\begin{aligned}
J(\pi) &\geq J(\pi_t) + \sum_s d^{\pi_t}(s) \sum_a \hat{Q}^{\pi_t}(s, a) [p^\pi(a|s) - p^{\pi_t}(a|s)] - \left( \frac{1}{\eta} + \frac{1}{c} \right) \sum_s d^{\pi_t}(s) \text{KL}(p^\pi(\cdot|s) || p^{\pi_t}(\cdot|s)) \\
&\quad - \left[ \sum_s d^{\pi_t}(s) \left[ \sum_a p^{\pi_t}(a|s) [Q^{\pi_t}(s, a) - \hat{Q}^{\pi_t}(s, a)] + \frac{1}{c} \log \left( \sum_a p^{\pi_t}(a|s) \exp(-c [Q^{\pi_t}(s, a) - \hat{Q}^{\pi_t}(s, a)]) \right) \right] \right] \\
&= J(\pi_t) - \underbrace{\mathbb{E}_{s \sim d^{\pi_t}} \left[ \mathbb{E}_{a \sim p^{\pi_t}(\cdot|s)} [\hat{Q}^{\pi_t}(s, a)] \right]}_{:= -C} + \mathbb{E}_{s \sim d^{\pi_t}} \left[ \mathbb{E}_{a \sim p^\pi(\cdot|s)} \left[ \hat{Q}^{\pi_t}(s, a) - \left( \frac{1}{\eta} + \frac{1}{c} \right) \log \left( \frac{p^\pi(a|s)}{p^{\pi_t}(a|s)} \right) \right] \right] \\
&\quad - \left[ \sum_s d^{\pi_t}(s) \left[ \sum_a p^{\pi_t}(a|s) [Q^{\pi_t}(s, a) - \hat{Q}^{\pi_t}(s, a)] + \frac{1}{c} \log \left( \sum_a p^{\pi_t}(a|s) \exp(-c [Q^{\pi_t}(s, a) - \hat{Q}^{\pi_t}(s, a)]) \right) \right] \right] \\
J(\pi) &\geq J(\pi_t) + C + \mathbb{E}_{s \sim d^{\pi_t}} \left[ \mathbb{E}_{a \sim p^{\pi_t}(\cdot|s)} \left[ \frac{p^\pi(a|s)}{p^{\pi_t}(a|s)} \left( \hat{Q}^{\pi_t}(s, a) - \left( \frac{1}{\eta} + \frac{1}{c} \right) \log \left( \frac{p^\pi(a|s)}{p^{\pi_t}(a|s)} \right) \right) \right] \right] \\
&\quad - \mathbb{E}_{s \sim d^{\pi_t}} \left[ \mathbb{E}_{a \sim p^{\pi_t}(\cdot|s)} [Q^{\pi_t}(s, a) - \hat{Q}^{\pi_t}(s, a)] + \frac{1}{c} \log \left( \mathbb{E}_{a \sim p^{\pi_t}(\cdot|s)} \left[ \exp(-c [Q^{\pi_t}(s, a) - \hat{Q}^{\pi_t}(s, a)]) \right] \right) \right]
\end{aligned}$$

□

**Proposition 6.** For the softmax representation and log-sum-exp mirror map,  $c > 0$ ,  $\eta \leq 1 - \gamma$ ,

$$\begin{aligned}
J(\pi) - J(\pi_t) &\geq \mathbb{E}_{s \sim d^{\pi_t}} \mathbb{E}_{a \sim p^{\pi_t}(\cdot|s)} \left[ \left( \hat{A}^{\pi_t}(s, a) + \frac{1}{\eta} + \frac{1}{c} \right) \log \left( \frac{p^\pi(a|s)}{p^{\pi_t}(a|s)} \right) \right] \\
&\quad - \frac{1}{c} \mathbb{E}_{s \sim d^{\pi_t}} \mathbb{E}_{a \sim p^{\pi_t}(\cdot|s)} \left[ \left( 1 - c [A^{\pi_t}(s, a) - \hat{A}^{\pi_t}(s, a)] \right) \log \left( 1 - c [A^{\pi_t}(s, a) - \hat{A}^{\pi_t}(s, a)] \right) \right],
\end{aligned}$$

where  $\hat{A}^{\pi_t}$  is the estimate of the advantage function for policy  $\pi_t$ .

*Proof.* For the softmax representation,  $\pi_{s,a} = z(s, a)$  s.t.  $p^\pi(a|s) = \frac{\exp(z(s, a))}{\sum_{a'} \exp(z(s, a'))}$ . Using the policy gradient theorem,  $[\nabla_\pi J(\pi)]_{s,a} = d^\pi(s) p^\pi(a|s) A^\pi(s, a)$ . We choose  $\hat{g}(\pi)$  such that  $[\hat{g}(\pi)]_{s,a} = d^\pi(s) p^\pi(a|s) \hat{A}^\pi(s, a)$  as the estimated gradient. Using [56, Proposition 3],  $J + \frac{1}{\eta} \Phi$  is convex for  $\eta \leq 1 - \gamma$ . Define  $\delta_s \in \mathbb{R}^A$  such that  $\delta_t^s[a] := \nabla_{\pi^s} J(\pi_t) - \hat{g}^s(\pi_t) = p^{\pi_t}(a|s) [A^{\pi_t}(s, a) - \hat{A}^{\pi_t}(s, a)]$ . Using Prop. 18 with  $c_s = c$  for all  $s$ ,

$$J(\pi) \geq J(\pi_t) + \langle \hat{g}(\pi_t), \pi - \pi_t \rangle - \sum_s d^{\pi_t}(s) \left( \frac{1}{\eta} + \frac{1}{c} \right) D_\phi(\pi^s, \pi_t^s) - \sum_s \frac{d^{\pi_t}(s) D_{\phi^*}(\nabla \phi(\pi_t^s) - c \delta_t^s, \nabla \phi(\pi_t^s))}{c}$$

Since  $\phi(\pi^s) = \phi(z(s, \cdot)) = \log(\sum_a \exp(z(s, a)))$ , using Lemma 28,  $D_\phi(\pi^s, \pi_t^s) = \text{KL}(p^{\pi_t}(\cdot|s) || p^\pi(\cdot|s))$  where  $p^\pi(a|s) = \frac{\exp(z(s, a))}{\sum_{a'} \exp(z(s, a'))}$  and  $p^{\pi_t}(a|s) = \frac{\exp(z_t(s, a))}{\sum_{a'} \exp(z_t(s, a'))}$ . Hence, the above bound can be simplified as,

$$\begin{aligned}
J(\pi) &\geq J(\pi_t) + \sum_s d^{\pi_t}(s) \sum_a \hat{A}^{\pi_t}(s, a) p^{\pi_t}(a|s) [z(s, a) - z_t(s, a)] - \left( \frac{1}{\eta} + \frac{1}{c} \right) \sum_s d^{\pi_t}(s) \text{KL}(p^{\pi_t}(\cdot|s) || p^\pi(\cdot|s)) \\
&\quad - \sum_s \frac{d^{\pi_t}(s) D_{\phi^*}(\nabla \phi(\pi_t^s) - c \delta_t^s, \nabla \phi(\pi_t^s))}{c}
\end{aligned}$$



803 Using Lemma 25 to simplify the last term,

$$\begin{aligned}
& \sum_s \frac{d^{\pi_t}(s) D_{\phi^*}(\nabla \phi(\pi_t^s) - c \delta_t^s, \nabla \phi(\pi_t^s))}{c} \\
&= \frac{1}{c} \left[ \sum_s d^{\pi_t}(s) \left[ \sum_a (p^{\pi_t}(a|s) - c \delta_t^s[a]) \log \left( \frac{p^{\pi_t}(a|s) - c \delta_t^s[a]}{p^{\pi_t}(a|s)} \right) \right] \right] \\
&= \frac{1}{c} \left[ \sum_s d^{\pi_t}(s) \left[ \sum_a \left( p^{\pi_t}(a|s) - c [p^{\pi_t}(a|s) [A^{\pi_t}(s, a) - \hat{A}^{\pi_t}(s, a)]] \right) \log \left( \frac{p^{\pi_t}(a|s) - c [p^{\pi_t}(a|s) [A^{\pi_t}(s, a) - \hat{A}^{\pi_t}(s, a)]]}{p^{\pi_t}(a|s)} \right) \right] \right] \\
&= \frac{1}{c} \left[ \sum_s d^{\pi_t}(s) \left[ \sum_a p^{\pi_t}(a|s) \left[ (1 - c [A^{\pi_t}(s, a) - \hat{A}^{\pi_t}(s, a)]) \log (1 - c [A^{\pi_t}(s, a) - \hat{A}^{\pi_t}(s, a)]) \right] \right] \right]
\end{aligned}$$

804 Putting everything together,

$$\begin{aligned}
J(\pi) &\geq J(\pi_t) + \sum_s d^{\pi_t}(s) \sum_a \hat{A}^{\pi_t}(s, a) p^{\pi_t}(a|s) [z(s, a) - z_t(s, a)] - \left( \frac{1}{\eta} + \frac{1}{c} \right) \sum_s d^{\pi_t}(s) \text{KL}(p^{\pi_t}(\cdot|s) || p^\pi(\cdot|s)) \\
&\quad - \frac{1}{c} \left[ \sum_s d^{\pi_t}(s) \left[ \sum_a p^{\pi_t}(a|s) \left[ (1 - c [A^{\pi_t}(s, a) - \hat{A}^{\pi_t}(s, a)]) \log (1 - c [A^{\pi_t}(s, a) - \hat{A}^{\pi_t}(s, a)]) \right] \right] \right] \\
&= J(\pi_t) + \sum_s d^{\pi_t}(s) \sum_a \left[ p^{\pi_t}(a|s) \hat{A}^{\pi_t}(s, a) [z(s, a) - z_t(s, a)] - \left( \frac{1}{\eta} + \frac{1}{c} \right) p^{\pi_t}(a|s) \log \left( \frac{p^{\pi_t}(a|s)}{p^\pi(a|s)} \right) \right] \\
&\quad - \frac{1}{c} \mathbb{E}_{s \sim d^{\pi_t}} \mathbb{E}_{a \sim p^{\pi_t}(\cdot|s)} \left[ (1 - c [A^{\pi_t}(s, a) - \hat{A}^{\pi_t}(s, a)]) \log (1 - c [A^{\pi_t}(s, a) - \hat{A}^{\pi_t}(s, a)]) \right]
\end{aligned}$$

805 Let us focus on simplifying  $\sum_a [p^{\pi_t}(a|s) \hat{A}^{\pi_t}(s, a) [z(s, a) - z_t(s, a)]]$  for a fixed  $s$ . Note that  $\sum_a p^{\pi_t}(a|s) \hat{A}^{\pi_t}(s, a) =$

806  $0 \implies \log(\sum_{a'} \exp(z(s, a'))) \sum_a p^{\pi_t}(a|s) \hat{A}^{\pi_t}(s, a) = 0$ .

$$\begin{aligned}
& \sum_a [p^{\pi_t}(a|s) \hat{A}^{\pi_t}(s, a) z(s, a)] = \sum_a \left[ p^{\pi_t}(a|s) \hat{A}^{\pi_t}(s, a) \left( z(s, a) - \log \left( \sum_{a'} \exp(z(s, a')) \right) \right) \right] \\
&= \sum_a \left[ p^{\pi_t}(a|s) \hat{A}^{\pi_t}(s, a) \left( \log(\exp(z(s, a))) - \log \left( \sum_{a'} \exp(z(s, a')) \right) \right) \right] \\
&= \sum_a \left[ p^{\pi_t}(a|s) \hat{A}^{\pi_t}(s, a) \log \left( \frac{\exp(z(s, a))}{\sum_{a'} \exp(z(s, a'))} \right) \right] = \mathbb{E}_{a \sim p^{\pi_t}(\cdot|s)} [\hat{A}^{\pi_t}(s, a) \log(p^\pi(a|s))]
\end{aligned}$$

807 Similarly, simplifying  $\sum_a [p^{\pi_t}(a|s) \hat{A}^{\pi_t}(s, a) z_t(s, a)]$

$$\begin{aligned}
& \sum_a [p^{\pi_t}(a|s) \hat{A}^{\pi_t}(s, a) z_t(s, a)] = \mathbb{E}_{a \sim p^{\pi_t}(\cdot|s)} [\hat{A}^{\pi_t}(s, a) \log(p^{\pi_t}(a|s))] \\
&\implies \sum_a [p^{\pi_t}(a|s) \hat{A}^{\pi_t}(s, a) [z(s, a) - z_t(s, a)]] = \mathbb{E}_{a \sim p^{\pi_t}(\cdot|s)} \left[ \hat{A}^{\pi_t}(s, a) \log \left( \frac{p^\pi(a|s)}{p^{\pi_t}(a|s)} \right) \right]
\end{aligned}$$

808 Using the above relations,

$$\begin{aligned}
J(\pi) &\geq J(\pi_t) + \sum_s d^{\pi_t}(s) \mathbb{E}_{a \sim p^{\pi_t}(\cdot|s)} \left[ \hat{A}^{\pi_t}(s, a) \log \left( \frac{p^\pi(a|s)}{p^{\pi_t}(a|s)} \right) - \left( \frac{1}{\eta} + \frac{1}{c} \right) \log \left( \frac{p^{\pi_t}(a|s)}{p^\pi(a|s)} \right) \right] \\
&\quad - \frac{1}{c} \mathbb{E}_{s \sim d^{\pi_t}} \mathbb{E}_{a \sim p^{\pi_t}(\cdot|s)} \left[ (1 - c [A^{\pi_t}(s, a) - \hat{A}^{\pi_t}(s, a)]) \log (1 - c [A^{\pi_t}(s, a) - \hat{A}^{\pi_t}(s, a)]) \right] \\
&= J(\pi_t) + \mathbb{E}_{s \sim d^{\pi_t}} \mathbb{E}_{a \sim p^{\pi_t}(\cdot|s)} \left[ \left( \hat{A}^{\pi_t}(s, a) + \frac{1}{\eta} + \frac{1}{c} \right) \log \left( \frac{p^\pi(a|s)}{p^{\pi_t}(a|s)} \right) \right] \\
&\quad - \frac{1}{c} \mathbb{E}_{s \sim d^{\pi_t}} \mathbb{E}_{a \sim p^{\pi_t}(\cdot|s)} \left[ (1 - c [A^{\pi_t}(s, a) - \hat{A}^{\pi_t}(s, a)]) \log (1 - c [A^{\pi_t}(s, a) - \hat{A}^{\pi_t}(s, a)]) \right].
\end{aligned}$$

809 □

810 **Proposition 8.** For the stochastic value gradient representation and Euclidean mirror map,  $c > 0$ ,  $\eta$  such that  $J + \frac{1}{\eta}\Phi$  is  
811 convex in  $\pi$ .

$$J(\pi) - J(\pi_t) \geq C + \mathbb{E}_{s \sim d^{\pi_t}} \mathbb{E}_{\varepsilon \sim \chi} \left[ \widehat{\nabla_a Q^{\pi_t}}(s, a) \Big|_{a=\pi_t(s, \varepsilon)} \pi(s, \varepsilon) - \frac{1}{2} \left( \frac{1}{\eta} + \frac{1}{c} \right) [\pi_t(s, \varepsilon) - \pi(s, \varepsilon)]^2 \right] \\ - \frac{c}{2} \mathbb{E}_{s \sim d^{\pi_t}} \mathbb{E}_{\varepsilon \sim \chi} \left[ \nabla_a Q^{\pi_t}(s, a) \Big|_{a=\pi_t(s, \varepsilon)} - \widehat{\nabla_a Q^{\pi_t}}(s, a) \Big|_{a=\pi_t(s, \varepsilon)} \right]^2$$

812 where  $C$  is a constant and  $\widehat{\nabla_a Q^{\pi_t}}(s, a) \Big|_{a=\pi_t(s, \varepsilon)}$  is the estimate of the action-value gradients for policy  $\pi$  at state  $s$  and  
813  $a = \pi_t(s, \varepsilon)$ .

814 *Proof.* For stochastic value gradients with a fixed  $\varepsilon$ ,  $\frac{\partial J(\pi)}{\partial \pi(s, \varepsilon)} = d^\pi(s) \nabla_a Q^\pi(s, a) \Big|_{a=\pi(s, \varepsilon)}$ . We choose  $\hat{g}(\pi)$   
815 such that  $[\hat{g}(\pi)]_{s, a} = d^\pi(s) \widehat{\nabla_a Q^\pi}(s, a) \Big|_{a=\pi(s, \varepsilon)}$ . Define  $\delta_t^s \in \mathbb{R}^A$  such that  $\delta_t^s[a] := \nabla_a Q^{\pi_t}(s, a) \Big|_{a=\pi_t(s, \varepsilon)} -$   
816  $\widehat{\nabla_a Q^{\pi_t}}(s, a) \Big|_{a=\pi_t(s, \varepsilon)}$ . Using Prop. 18 with  $c_s = c$  for all  $s$ ,

$$J(\pi) \geq J(\pi_t) + \mathbb{E}_{\varepsilon \sim \chi} \left[ \sum_s d^{\pi_t}(s) \widehat{\nabla_a Q^{\pi_t}}(s, a) \Big|_{a=\pi_t(s, \varepsilon)} [\pi(s, \varepsilon) - \pi_t(s, \varepsilon)] - \sum_s d^{\pi_t}(s) \left( \frac{1}{\eta} + \frac{1}{c} \right) D_\phi(\pi^s, \pi_t^s) \right. \\ \left. - \sum_s \frac{d^{\pi_t}(s) D_{\phi^*}(\nabla \phi(\pi_t^s) - c \delta_t^s, \nabla \phi(\pi_t^s))}{c} \right]$$

817 For a fixed  $\varepsilon$ , since  $\phi(\pi^s) = \phi(\pi(s, \varepsilon)) = \frac{1}{2}[\pi(s, \varepsilon)]^2$ ,  $D_\phi(\pi^s, \pi_t^s) = \frac{1}{2}[\pi(s, \varepsilon) - \pi_t(s, \varepsilon)]^2$ . Hence,

$$J(\pi) \geq J(\pi_t) + \mathbb{E}_{\varepsilon \sim \chi} \left[ \sum_s d^{\pi_t}(s) \widehat{\nabla_a Q^{\pi_t}}(s, a) \Big|_{a=\pi_t(s, \varepsilon)} [\pi(s, \varepsilon) - \pi_t(s, \varepsilon)] - \frac{1}{2} \left( \frac{1}{\eta} + \frac{1}{c} \right) \sum_s d^{\pi_t}(s) [\pi(s, \varepsilon) - \pi_t(s, \varepsilon)]^2 \right. \\ \left. - \sum_s \frac{d^{\pi_t}(s) D_{\phi^*}(\nabla \phi(\pi_t^s) - c \delta_t^s, \nabla \phi(\pi_t^s))}{c} \right]$$

818 Simplifying the last term, since  $\phi(\pi(s, \varepsilon)) = \frac{1}{2}[\pi(s, \varepsilon)]^2$ ,

$$\frac{D_{\phi^*}(\nabla \phi(\pi_t^s) - c \delta_t^s, \nabla \phi(\pi_t^s))}{c} = \frac{c}{2} [\delta_t^s]^2 = \frac{c}{2} \left[ \nabla_a Q^{\pi_t}(s, a) \Big|_{a=\pi_t(s, \varepsilon)} - \widehat{\nabla_a Q^{\pi_t}}(s, a) \Big|_{a=\pi_t(s, \varepsilon)} \right]^2$$

819 Putting everything together,

$$J(\pi) \geq J(\pi_t) + \mathbb{E}_{\varepsilon \sim \chi} \left[ \sum_s d^{\pi_t}(s) \widehat{\nabla_a Q^{\pi_t}}(s, a) \Big|_{a=\pi_t(s, \varepsilon)} \pi(s, \varepsilon) - \underbrace{\sum_s d^{\pi_t}(s) \nabla_a Q^{\pi_t}(s, a) \Big|_{a=\pi_t(s, \varepsilon)} \pi_t(s, \varepsilon)}_{:= -C} \right] \\ - \mathbb{E}_{\varepsilon \sim \chi} \left[ \frac{1}{2} \left( \frac{1}{\eta} + \frac{1}{c} \right) \sum_s d^{\pi_t}(s) [\pi(s, \varepsilon) - \pi_t(s, \varepsilon)]^2 - \frac{c}{2} \sum_s d^{\pi_t}(s) \left[ \nabla_a Q^{\pi_t}(s, a) \Big|_{a=\pi_t(s, \varepsilon)} - \widehat{\nabla_a Q^{\pi_t}}(s, a) \Big|_{a=\pi_t(s, \varepsilon)} \right]^2 \right] \\ J(\pi) \geq J(\pi_t) + C + \mathbb{E}_{\varepsilon \sim \chi} \left[ \mathbb{E}_{s \sim d^{\pi_t}} \left[ \widehat{\nabla_a Q^{\pi_t}}(s, a) \Big|_{a=\pi_t(s, \varepsilon)} \pi(s, \varepsilon) - \frac{1}{2} \left( \frac{1}{\eta} + \frac{1}{c} \right) [\pi(s, \varepsilon) - \pi_t(s, \varepsilon)]^2 \right] \right] \\ - \frac{c}{2} \mathbb{E}_{\varepsilon \sim \chi} \left[ \mathbb{E}_{s \sim d^{\pi_t}} \left[ \nabla_a Q^{\pi_t}(s, a) \Big|_{a=\pi_t(s, \varepsilon)} - \widehat{\nabla_a Q^{\pi_t}}(s, a) \Big|_{a=\pi_t(s, \varepsilon)} \right]^2 \right]$$

820 □

821 **Proposition 19.** For the softmax representation and Euclidean mirror map,  $c > 0$ ,  $\eta \leq \frac{(1-\gamma)^3}{8}$  then

$$J(\pi) \geq J(\pi_t) + C + \mathbb{E}_{s \sim d^{\pi_t}(s)} \left[ \mathbb{E}_{a \sim p^{\pi_t}(\cdot|s)} \left[ \hat{A}^{\pi_t}(s, a) z(s, a) \right] - \frac{1}{2} \left( \frac{1}{\eta} + \frac{1}{c} \right) \|z(s, \cdot) - z_t(s, \cdot)\|_2^2 \right] \\ - \frac{c}{2} \mathbb{E}_{s \sim d^{\pi_t}} \mathbb{E}_{a \sim p^{\pi_t}(\cdot|s)} \left[ A^{\pi_t}(s, a) - \hat{A}^{\pi_t}(s, a) \right]^2$$

822 where  $C$  is a constant and  $\hat{A}^\pi$  is the estimate of advantage function for policy  $\pi_t$ .

823 *Proof.* For the softmax representation,  $\pi_{s,a} = z(s, a)$  s.t.  $p^\pi(a|s) = \frac{\exp(z(s,a))}{\sum_{a'} \exp(z(s,a'))}$ . Using the policy gradient theorem,  
824  $[\nabla_\pi J(\pi)]_{s,a} = d^\pi(s) p^\pi(a|s) A^\pi(s, a)$ . We choose  $\hat{g}(\pi)$  such that  $[\hat{g}(\pi)]_{s,a} = d^\pi(s) p^\pi(a|s) \hat{A}^\pi(s, a)$  as the estimated  
825 gradient. Define  $\delta_s \in \mathbb{R}^A$  such that  $\delta_t^s[a] := \nabla_{\pi^s} J(\pi_t) - \hat{g}^s(\pi_t) = p^{\pi_t}(a|s) [A^{\pi_t}(s, a) - \hat{A}^{\pi_t}(s, a)]$ . Using [36, Lemma  
826 7],  $J + \frac{1}{\eta} \Phi$  is convex for  $\eta \leq 1 - \gamma$ . Using Prop. 18 with  $c_s = c$  for all  $s$ ,

$$J(\pi) \geq J(\pi_t) + \langle \hat{g}(\pi_t), \pi - \pi_t \rangle - \left( \frac{1}{\eta} + \frac{1}{c} \right) \sum_s d^{\pi_t}(s) D_\phi(\pi^s, \pi_t^s) - \sum_s \frac{d^{\pi_t}(s) D_{\phi^*}(\nabla \phi(\pi_t^s) - c \delta_t^s, \nabla \phi(\pi_t^s))}{c}$$

827 Since  $\phi(\pi^s) = \phi(z(s, \cdot)) = \frac{1}{2} \sum_a [z_{s,a}]^2$ ,  $D_\phi(\pi^s, \pi_t^s) = \frac{1}{2} \|z(s, \cdot) - z_t(s, \cdot)\|_2^2$ . Hence,

$$J(\pi) \geq J(\pi_t) + \sum_s d^{\pi_t}(s) \sum_a \hat{A}^{\pi_t}(s, a) p^{\pi_t}(a|s) [z(s, a) - z_t(s, a)] - \frac{1}{2} \left( \frac{1}{\eta} + \frac{1}{c} \right) \sum_s d^{\pi_t}(s) \|z(s, \cdot) - z_t(s, \cdot)\|_2^2 \\ - \sum_s \frac{d^{\pi_t}(s) D_{\phi^*}(\nabla \phi(\pi_t^s) - c \delta_t^s, \nabla \phi(\pi_t^s))}{c}$$

828 Simplifying the last term, since  $\phi(z(\cdot, a)) = \frac{1}{2} [z(s, a)]^2$ ,

$$\frac{\sum_s d^{\pi_t}(s) D_{\phi^*}(\nabla \phi(\pi_t^s) - c \delta_t^s, \nabla \phi(\pi_t^s))}{c} = \frac{c}{2} \sum_s d^{\pi_t}(s) \sum_a [\delta_t^s(a)]^2 \\ = \frac{c}{2} \sum_s d^{\pi_t}(s) \sum_a p^{\pi_t}(a|s)^2 [A^{\pi_t}(s, a) - \hat{A}^{\pi_t}(s, a)]^2 \\ \leq \frac{c}{2} \sum_s d^{\pi_t}(s) \sum_a p^{\pi_t}(a|s) [A^{\pi_t}(s, a) - \hat{A}^{\pi_t}(s, a)]^2 \quad (\text{Since } p^{\pi_t}(a|s) \leq 1)$$

829 Putting everything together,

$$J(\pi) \geq J(\pi_t) + \sum_s d^{\pi_t}(s) \sum_a \hat{A}^{\pi_t}(s, a) p^{\pi_t}(a|s) [z(s, a) - z_t(s, a)] - \frac{1}{2} \left( \frac{1}{\eta} + \frac{1}{c} \right) \sum_s d^{\pi_t}(s) \|z(s, \cdot) - z_t(s, \cdot)\|_2^2 \\ - \frac{c}{2} \sum_s d^{\pi_t}(s) \sum_a p^{\pi_t}(a|s) [A^{\pi_t}(s, a) - \hat{A}^{\pi_t}(s, a)]^2 \\ = J(\pi_t) - \underbrace{\sum_s d^{\pi_t}(s) \sum_a \hat{A}^{\pi_t}(s, a) p^{\pi_t}(a|s) z_t(s, a)}_{:= -C} \\ + \sum_s d^{\pi_t}(s) \left[ \sum_a \hat{A}^{\pi_t}(s, a) p^{\pi_t}(a|s) z(s, a) - \frac{1}{2} \left( \frac{1}{\eta} + \frac{1}{c} \right) \|z(s, \cdot) - z_t(s, \cdot)\|_2^2 \right] \\ - \frac{c}{2} \sum_s d^{\pi_t}(s) \sum_a p^{\pi_t}(a|s) [A^{\pi_t}(s, a) - \hat{A}^{\pi_t}(s, a)]^2 \\ = J(\pi_t) + C + \mathbb{E}_{s \sim d^{\pi_t}} \left[ \mathbb{E}_{a \sim p^{\pi_t}(\cdot|s)} \left[ \hat{A}^{\pi_t}(s, a) z(s, a) \right] - \frac{1}{2} \left( \frac{1}{\eta} + \frac{1}{c} \right) \|z(s, \cdot) - z_t(s, \cdot)\|_2^2 \right] \\ - \frac{c}{2} \mathbb{E}_{s \sim d^{\pi_t}} \mathbb{E}_{a \sim p^{\pi_t}(\cdot|s)} \left[ A^{\pi_t}(s, a) - \hat{A}^{\pi_t}(s, a) \right]^2$$

830 □

**Proposition 20.** For both the direct (with the negative-entropy mirror map) and softmax representations (with the log-sum-exp mirror map), for a fixed state  $s$ , if  $\delta \in \mathbb{R}^A := \nabla_{\pi^s} J(\pi_t) - \hat{g}^s(\pi_t)$ , the second-order Taylor expansion of  $f(c) = D_{\phi^*}(\nabla\phi(\pi_t^s) - c\delta, \nabla\phi(\pi_t^s))$  around  $c = 0$  is equal to

$$f(c) \approx \frac{c^2}{2} \sum_a p^{\pi_t}(a|s) [A(s, a) - \hat{A}(s, a)]^2.$$

*Proof.*

$$\begin{aligned} f(c) &= D_{\phi^*}(\nabla\phi(\pi_t^s) - c\delta, \nabla\phi(\pi_t^s)) \implies f(0) = D_{\phi^*}(\nabla\phi(\pi_t^s), \nabla\phi(\pi_t^s)) = 0 \\ f(c) &= D_{\phi^*}(\nabla\phi(\pi_t^s) - c\delta, \nabla\phi(\pi_t^s)) = \phi^*(\nabla\phi(\pi_t^s) - c\delta) - \phi^*(\nabla\phi(\pi_t^s)) - \langle \nabla\phi^*(\nabla\phi(\pi_t^s)), \nabla\phi(\pi_t^s) - c\delta - \nabla\phi(\pi_t^s) \rangle \\ \implies f'(c) &= \langle \nabla\phi^*(\nabla\phi(\pi_t^s) - c\delta), -\delta \rangle + \langle \pi_t^s, \delta \rangle \implies f'(0) = \langle \pi_t^s, -\delta \rangle + \langle \pi_t^s, \delta \rangle = 0 \\ f''(c) &= \langle \delta, \nabla^2\phi^*(\nabla\phi(\pi_t^s) - c\delta)\delta \rangle \implies f''(0) = \langle \delta, \nabla^2\phi^*(\nabla\phi(\pi_t^s))\delta \rangle. \end{aligned}$$

By the second-order Taylor series expansion of  $f(c)$  around  $c = 0$ ,

$$f(c) \approx f(0) + f'(0)(c - 0) + \frac{f''(0)(c - 0)^2}{2} = \frac{c^2}{2} \langle \delta, \nabla^2\phi^*(\nabla\phi(\pi_t^s))\delta \rangle$$

Let us first consider the softmax case with the log-sum-exp mirror map, where  $\pi^s = z(s, \cdot)$  and  $\phi(z(s, \cdot)) = \log(\sum_a \exp(z(s, a)))$ ,  $\phi^*(p^\pi(\cdot|s)) = \sum_a p^\pi(a|s) \log(p^\pi(a|s))$ . Since the negative entropy and log-sum-exp are Fenchel conjugates (see Lemma 26),  $\nabla\phi(z_t(s, \cdot)) = p^{\pi_t}(\cdot|s)$ . Hence, we need to compute  $\nabla^2\phi^*(p^{\pi_t}(\cdot|s))$ .

$$\nabla\phi^*(p^{\pi_t}(\cdot|s)) = 1 + \log(p^{\pi_t}(\cdot|s)) \quad ; \quad \nabla^2\phi^*(p^{\pi_t}(\cdot|s)) = \text{diag}(1/p^{\pi_t}(\cdot|s))$$

For the softmax representation, using the policy gradient theorem,  $[\delta]_a = p^{\pi_t}(a|s)[A(s, a) - \hat{A}(s, a)]$  and hence,

$$\langle \delta, \nabla^2\phi^*(\nabla\phi(\pi_t))\delta \rangle = \sum_a p^{\pi_t}(a|s) [A(s, a) - \hat{A}(s, a)]^2.$$

Hence, for the softmax representation, the second-order Taylor series expansion around  $c = 0$  is equal to,

$$f(c) \approx \frac{c^2}{2} \sum_a p^{\pi_t}(a|s) [A(s, a) - \hat{A}(s, a)]^2.$$

Now let us consider the direct case, where  $\pi^s = p^\pi(\cdot|s)$ ,  $\phi(p^\pi(\cdot|s)) = \sum_a p^\pi(a|s) \log(p^\pi(a|s))$ ,  $\phi^*(z(s, \cdot)) = \log(\sum_a \exp(z(s, a)))$ . Since the negative entropy and log-sum-exp are Fenchel conjugates (see Lemma 26),  $\nabla\phi(p^{\pi_t}(\cdot|s)) = z_t(s, \cdot)$ . Hence, we need to compute  $\nabla^2\phi^*(z_t(s, \cdot))$ .

$$\begin{aligned} [\nabla\phi^*(z_t(s, \cdot))]_a &= \frac{\exp z_t(s, a)}{\sum_{a'} \exp(z_t(s, a'))} = p^{\pi_t}(a|s) \quad ; \quad [\nabla^2\phi^*(z_t(s, \cdot))]_{a,a} = p^{\pi_t}(a|s) - [p^{\pi_t}(a|s)]^2 \\ [\nabla^2\phi^*(z_t(s, \cdot))]_{a,a'} &= -p^{\pi_t}(a|s) p^{\pi_t}(a'|s) \implies \nabla^2\phi^*(z_t(s, \cdot)) = \text{diag}(p^{\pi_t}(\cdot|s)) - p^{\pi_t}(\cdot|s) [p^{\pi_t}(\cdot|s)]^\top. \end{aligned}$$

For the direct representation, using the policy gradient theorem,  $[\delta]_a = Q^{\pi_t}(s, a) - \hat{Q}^{\pi_t}(s, a)$  and hence,

$$\begin{aligned} \langle \delta, \nabla^2\phi^*(\nabla\phi(\pi_t))\delta \rangle &= [Q^{\pi_t}(s, \cdot) - \hat{Q}^{\pi_t}(s, \cdot)]^\top [\text{diag}(p^{\pi_t}(\cdot|s)) - p^{\pi_t}(\cdot|s) [p^{\pi_t}(\cdot|s)]^\top] [Q^{\pi_t}(s, \cdot) - \hat{Q}^{\pi_t}(s, \cdot)] \\ &= \sum_a p^{\pi_t}(a|s) [Q^{\pi_t}(s, a) - \hat{Q}^{\pi_t}(s, a)]^2 - \left[ \langle p^{\pi_t}(a|s), Q^{\pi_t}(s, \cdot) - \hat{Q}^{\pi_t}(s, \cdot) \rangle \right]^2 \\ &= \sum_a p^{\pi_t}(a|s) [Q^{\pi_t}(s, a) - \hat{Q}^{\pi_t}(s, a)]^2 - \left[ J_s(\pi_t) - \hat{J}_s(\pi_t) \right]^2 \end{aligned}$$

(where  $\hat{J}_s(\pi_t)$  is the estimated value function for starting state  $s$ )

Hence, for the direct representation, the second-order Taylor series expansion around  $c = 0$  is equal to,

$$\begin{aligned}
f(c) &\approx \frac{c^2}{2} \left[ \sum_a p^{\pi_t}(a|s) [Q^{\pi_t}(s, a) - \hat{Q}^{\pi_t}(s, a)]^2 - [J_s(\pi_t) - \hat{J}_s(\pi_t)]^2 \right] \\
&= \frac{c^2}{2} \left[ \sum_a p^{\pi_t}(a|s) [Q^{\pi_t}(s, a) - \hat{Q}^{\pi_t}(s, a)]^2 - 2 [J_s(\pi_t) - \hat{J}_s(\pi_t)]^2 \sum_a p^{\pi_t}(a|s) + [J_s(\pi_t) - \hat{J}_s(\pi_t)]^2 \sum_a p^{\pi_t}(a|s) \right] \\
&= \frac{c^2}{2} \left[ \sum_a p^{\pi_t}(a|s) [Q^{\pi_t}(s, a) - \hat{Q}^{\pi_t}(s, a)]^2 - 2 [J_s(\pi_t) - \hat{J}_s(\pi_t)] \sum_a p^{\pi_t}(a|s) [Q^{\pi_t}(s, a) - \hat{Q}^{\pi_t}(s, a)] \right. \\
&\quad \left. + [J_s(\pi_t) - \hat{J}_s(\pi_t)]^2 \sum_a p^{\pi_t}(a|s) \right] \\
&= \frac{c^2}{2} \left[ \sum_a p^{\pi_t}(a|s) \left[ [Q^{\pi_t}(s, a) - \hat{Q}^{\pi_t}(s, a)]^2 - 2 [J_s(\pi_t) - \hat{J}_s(\pi_t)] [Q^{\pi_t}(s, a) - \hat{Q}^{\pi_t}(s, a)] + [J_s(\pi_t) - \hat{J}_s(\pi_t)]^2 \right] \right] \\
&= \frac{c^2}{2} \left[ \sum_a p^{\pi_t}(a|s) \left( [Q^{\pi_t}(s, a) - \hat{Q}^{\pi_t}(s, a)] - [J_s(\pi_t) - \hat{J}_s(\pi_t)] \right)^2 \right] \\
&= \frac{c^2}{2} \left[ \sum_a p^{\pi_t}(a|s) [A^{\pi_t}(s, a) - \hat{A}^{\pi_t}(s, a)]^2 \right]
\end{aligned}$$

□

## E.1 Bandit examples to demonstrate the benefit of the decision-aware loss

**Proposition 21** (Detailed version of Prop. 5). Consider a two-armed bandit example with deterministic rewards where arm 1 is optimal and has a reward  $r_1 = Q_1 = 2$  whereas arm 2 has reward  $r_2 = Q_2 = 1$ . Using a linear parameterization for the critic,  $Q$  function is estimated as:  $\hat{Q} = x\omega$  where  $\omega$  is the parameter to be learned and  $x$  is the feature of the corresponding arm. Let  $x_1 = -2$  and  $x_2 = 1$  implying that  $\hat{Q}_1(\omega) = -2\omega$  and  $\hat{Q}_2(\omega) = \omega$ . Let  $p_t$  be the probability of pulling the optimal arm at iteration  $t$ , and consider minimizing two alternative objectives to estimate  $\omega$ :

(1) Squared loss:  $\omega_t^{(1)} := \arg \min TD(\omega) := \arg \min \left\{ \frac{p_t}{2} [\hat{Q}_1(\omega) - Q_1]^2 + \frac{1-p_t}{2} [\hat{Q}_2(\omega) - Q_2]^2 \right\}$ .

(2) Decision-aware critic loss:  $\omega_t^{(2)} := \arg \min \mathcal{L}_t(\omega) := p_t [Q_1 - \hat{Q}_1(\omega)] + (1 - p_t) [Q_2 - \hat{Q}_2(\omega)] + \frac{1}{c} \log \left( p_t \exp(-c [Q_1 - \hat{Q}_1(\omega)]) + (1 - p_t) \exp(-c [Q_2 - \hat{Q}_2(\omega)]) \right)$ .

Using the tabular parameterization for the actor, the policy update at iteration  $t$  is given by:  $p_{t+1} = \frac{p_t \exp(\eta \hat{Q}_1)}{p_t \exp(\eta \hat{Q}_1) + (1-p_t) \exp(\eta \hat{Q}_2)}$ , where  $\eta$  is the functional step-size for the actor. For  $p_0 < \frac{2}{5}$ , minimizing the squared loss results in convergence to the sub-optimal action, while minimizing the decision-aware loss (for  $c, p_0 > 0$ ) results in convergence to the optimal action.

*Proof.* Note that  $\hat{Q}_1(\omega) - Q_1 = -2(\omega + 1)$  and  $\hat{Q}_2(\omega) - Q_2 = \omega - 1$ . Calculating  $\omega^{(1)}$  for a general policy s.t. the probability of pulling the optimal arm equal to  $p$ ,

$$\begin{aligned}
TD(\omega) &= \frac{p}{2} [\hat{Q}_1(\omega) - Q_1]^2 + \frac{1-p}{2} [\hat{Q}_2(\omega) - Q_2]^2 = \frac{1}{2} [4p(\omega + 1)^2 + (1-p)(\omega - 1)^2] \\
\implies \nabla_\omega TD(\omega) &= 4p(\omega + 1) + (1-p)(\omega - 1)
\end{aligned}$$

Setting the gradient to zero,

$$\implies \omega^{(1)} = \frac{1-5p}{3p+1}$$

Calculating  $\omega^{(2)}$  for a general policy s.t. the probability of pulling the optimal arm equal to  $p$ ,

$$\begin{aligned}
L_t(\omega) &= 2p(\omega + 1) - (1-p)(\omega - 1) + \frac{1}{c} \log(p \exp(-2c(\omega + 1)) + (1-p) \exp(c(\omega - 1))) \\
\implies \nabla_\omega L_t(\omega) &= (3p - 1) + \frac{1}{c} \nabla_\omega [\log(p \exp(-2c(\omega + 1)) + (1-p) \exp(c(\omega - 1)))]
\end{aligned}$$

Setting the gradient to zero,

$$\implies \nabla_\omega [\log(p \exp(-2c(\omega + 1)) + (1-p) \exp(c(\omega - 1)))] = (1 - 3p)c$$

Define  $A := \exp(-2c(\omega + 1))$  and  $B := \exp(c(\omega - 1))$

$$\implies \frac{-2pcA + (1-p)cB}{pA + (1-p)B} = (1-3p)c \implies \frac{A}{pA + (1-p)B} = 1 \implies \omega^{(2)} = \frac{-1}{3}.$$

Now, let us consider the actor update,

$$p_{t+1} = \frac{p_t \exp(\eta \hat{Q}_1)}{p_t \exp(\eta \hat{Q}_1) + (1-p_t) \exp(\eta \hat{Q}_2)} \implies \frac{p_{t+1}}{p_t} = \frac{1}{p_t + (1-p_t) \exp(\eta(\hat{Q}_2 - \hat{Q}_1))}$$

Since arm 1 is optimal, if  $\frac{p_{t+1}}{p_t} < 1$  for all  $t$ , the algorithm will converge to the sub-optimal arm. This happens when  $\frac{1}{p_t + (1-p_t) \exp(\eta(\hat{Q}_2 - \hat{Q}_1))} < 1 \implies \hat{Q}_2 - \hat{Q}_1 > 0 \implies \omega > 0$ . Hence, for any  $\eta$  and any iteration  $t$ , if  $\omega_t > 0$ ,  $p_{t+1} < p_t$ .

For the decision-aware critic loss,  $\omega_t^{(2)} = -\frac{1}{3}$  for all  $t$ , implying that  $p_{t+1} > p_t$  and hence the algorithm will converge to the optimal policy for any  $\eta$  and any initialization  $p_0 > 0$ . However, for the squared TD loss,  $\omega_t^{(2)} = \frac{1-5p_t}{3p_t+1}$ ,  $\omega_t^{(2)} > 0$  if  $p_t < \frac{1}{5}$ . Hence, if  $p_0 < \frac{1}{5}$ ,  $p_1 < p_0 < \frac{1}{5}$ . Using the same reasoning,  $p_2 < p_1 < p_0 < 1/5$ , and hence the policy will converge to the sub-optimal arm.  $\square$

**Proposition 22.** Consider two-armed bandit problem with deterministic rewards - arm 1 has a reward  $r_1 = Q_1$  whereas arm 2 has a reward  $r_2 = Q_2$  such that arm 1 is the optimal, i.e.  $Q_1 \geq Q_2$ . Using a linear parameterization for the critic,  $Q$  function is estimated as:  $\hat{Q} = x\omega$  where  $\omega$  is the parameter to be learned and  $x$  is the feature of the corresponding arm. Let  $p_t$  be the probability of pulling the optimal arm at iteration  $t$ , and consider minimizing the decision-aware critic loss to estimate  $\omega$ :  $\omega_t := \arg \min \mathcal{L}_t(\omega) := p_t [Q_1 - \hat{Q}_1(\omega)] + (1-p_t) [Q_2 - \hat{Q}_2(\omega)] + \frac{1}{c} \log \left( p_t \exp(-c[Q_1 - \hat{Q}_1(\omega)]) + (1-p_t) \exp(-c[Q_2 - \hat{Q}_2(\omega)]) \right)$ . Using the tabular parameterization for the actor, the policy update at iteration  $t$  is given by:  $p_{t+1} = \frac{p_t \exp(\eta \hat{Q}_1)}{p_t \exp(\eta \hat{Q}_1) + (1-p_t) \exp(\eta \hat{Q}_2)}$ , where  $\eta$  is the functional step-size for the actor. For the above problem, minimizing the decision-aware loss (for  $c, p_0 > 0$ ) results in convergence to the optimal action, and  $\mathcal{L}_t(\omega_t) = 0$  for any iteration  $t$ .

*Proof.* Define  $A := \exp(-c[Q_1 - \hat{Q}_1(\omega)])$  and  $B := \exp(-c[Q_2 - \hat{Q}_2(\omega)])$ . Calculating the gradient of  $\mathcal{L}_t$  w.r.t  $\omega$  and setting it to zero,

$$\begin{aligned} \nabla_{\omega} \mathcal{L}_t(\omega) &= p_t x_1 + (1-p_t) x_2 - \frac{p_t x_1 A + (1-p_t) x_2 B}{p_t A + (1-p_t) B} = 0 \\ &\implies p_t (1-p_t) A (x_1 - x_2) = p_t (1-p_t) B (x_1 - x_2) \\ &\implies Q_1 - x_1 \omega_t = Q_2 - x_2 \omega_t \implies \omega_t = \frac{Q_1 - Q_2}{x_1 - x_2}. \end{aligned}$$

Observe that  $Q_1 - \hat{Q}_1(\omega_t) = Q_2 - \hat{Q}_2(\omega_t)$  and thus  $\mathcal{L}_t(\omega_t) = 0$  for all  $t$ . Writing the actor update,

$$\begin{aligned} p_{t+1} &= \frac{p_t \exp(\eta x_1 \omega_t)}{p_t \exp(\eta x_1 \omega_t) + (1-p_t) \exp(\eta x_2 \omega_t)} \\ \implies \frac{p_{t+1}}{p_t} &= \frac{1}{p_t + (1-p_t) \exp(\eta (x_2 - x_1) \omega_t)} = \frac{1}{p_t + (1-p_t) \exp(\eta (Q_2 - Q_1))} \geq 1 \end{aligned}$$

$\square$

**Proposition 23** (Detailed version of Prop. 7). Consider a two-armed bandit example and define  $p \in [0, 1]$  as the probability of pulling arm 1. Given  $p$ , let the advantage of arm 1 be equal to  $A_1 := \frac{1}{2} > 0$ , while that of arm 2 is  $A_2 := -\frac{p}{2(1-p)} < 0$  implying that arm 1 is optimal. For the critic, consider approximating the advantage of the two arms using a discrete hypothesis class with two hypotheses that depend on  $p$  for:  $\mathcal{H}_0 : \hat{A}_1 = \frac{1}{2} + \varepsilon, \hat{A}_2 = -\frac{p}{1-p} (\frac{1}{2} + \varepsilon)$  and  $\mathcal{H}_1 : \hat{A}_1 = \frac{1}{2} - \varepsilon \operatorname{sgn}(\frac{1}{2} - p), \hat{A}_2 = -\frac{p}{1-p} (\frac{1}{2} - \varepsilon \operatorname{sgn}(\frac{1}{2} - p))$  where  $\operatorname{sgn}$  is the signum function and  $\varepsilon \in (\frac{1}{2}, 1)$ . If  $p_t$  is the probability of pulling arm 1 at iteration  $t$ , consider minimizing two alternative loss functions to choose the hypothesis  $\mathcal{H}_t$ :

(1) Squared (TD) loss:  $\mathcal{H}_t = \arg \min_{\{\mathcal{H}_0, \mathcal{H}_1\}} \left\{ \frac{p_t}{2} [A_1 - \hat{A}_1]^2 + \frac{1-p_t}{2} [A_2 - \hat{A}_2]^2 \right\}$ .

(2) Decision-aware critic loss (DA) with  $c = 1$ :  $\mathcal{H}_t = \arg \min_{\{\mathcal{H}_0, \mathcal{H}_1\}}$

$\left\{ p_t (1 - [A_1 - \hat{A}_1]) \log(1 - [A_1 - \hat{A}_1]) + (1-p_t) (1 - [A_2 - \hat{A}_2]) \log(1 - [A_2 - \hat{A}_2]) \right\}$ .

Using the tabular parameterization for the actor, the policy update at iteration  $t$  is given by:  $p_{t+1} =$

897  $\frac{p_t (1+\eta \hat{A}_1)}{p_t (1+\eta \hat{A}_1) + (1-p_t) (1+\eta \hat{A}_2)}$ . For  $p_0 \leq \frac{1}{2}$ , the squared loss cannot distinguish between  $\mathcal{H}_0$  and  $\mathcal{H}_1$ , and depending  
 898 on how ties are broken, minimizing it can result in convergence to the sub-optimal action. On the other hand, minimizing  
 899 the divergence loss (for any  $p_0 > 0$ ) results in convergence to the optimal arm.

900 *Proof.* First note that when  $p > \frac{1}{2}$ ,  $\mathcal{H}_0$  and  $\mathcal{H}_1$  are identical, ensure that  $\hat{A}_1 > \hat{A}_2$  and the algorithm will converge to the  
 901 optimal arm no matter which hypothesis is chosen. The regime of interest is therefore when  $p \leq \frac{1}{2}$  and we focus on this  
 902 case. Let us calculate the TD and decision-aware (DA) losses for  $\mathcal{H}_0$ .

$$\begin{aligned} A_1 - \hat{A}_1 &= \frac{1}{2} - \left(\frac{1}{2} + \varepsilon\right) = -\varepsilon \quad ; \quad A_2 - \hat{A}_2 = -\frac{p}{1-p} [1 - (1 + \varepsilon)] = \frac{p}{1-p} \varepsilon \\ \text{TD}(\hat{A}_1, \hat{A}_2) &= p\varepsilon^2 + (1-p) \left(\frac{p}{1-p} \varepsilon\right)^2 = p\varepsilon^2 + \frac{\varepsilon^2 p^2}{1-p} \\ \text{DA}(\hat{A}_1, \hat{A}_2) &= p(1 + \varepsilon) \log(1 + \varepsilon) + (1-p) \left(1 - \frac{\varepsilon p}{1-p}\right) \log\left(1 - \frac{\varepsilon p}{1-p}\right) \end{aligned}$$

903 Similarly, we can calculate the TD and decision-aware losses for  $\mathcal{H}_1$ .

$$\begin{aligned} A_1 - \hat{A}_1 &= \frac{1}{2} - \left(\frac{1}{2} - \varepsilon\right) = \varepsilon \quad ; \quad A_2 - \hat{A}_2 = -\frac{p}{1-p} \left[\frac{1}{2} - \left(\frac{1}{2} - \varepsilon\right)\right] = -\frac{p}{1-p} \varepsilon \\ \text{TD}(\hat{A}_1, \hat{A}_2) &= p\varepsilon^2 + (1-p) \left(\frac{p}{1-p} \varepsilon\right)^2 = p\varepsilon^2 + \frac{\varepsilon^2 p^2}{1-p} \\ \text{DA}(\hat{A}_1, \hat{A}_2) &= p(1 - \varepsilon) \log(1 - \varepsilon) + (1-p) \left(1 + \frac{\varepsilon p}{1-p}\right) \log\left(1 + \frac{\varepsilon p}{1-p}\right) \end{aligned}$$

904 For both  $\mathcal{H}_0$  and  $\mathcal{H}_1$ , the TD loss is equal to  $p\varepsilon^2 + \frac{\varepsilon^2 p^2}{1-p}$  and hence it cannot distinguish between the two hypotheses.  
 905 Writing the actor update,

$$p_{t+1} = \frac{p_t (1 + \eta \hat{A}_1)}{p_t (1 + \eta \hat{A}_1) + (1 - p_t) (1 + \eta \hat{A}_2)} \implies \frac{p_{t+1}}{p_t} = \frac{1}{p_t + (1 - p_t) \frac{1 + \eta \hat{A}_2}{1 + \eta \hat{A}_1}}$$

906 Hence, in order to ensure that  $p_{t+1} > p_t$  and eventual convergence to the optimal arm, we want that  $\hat{A}_2 < \hat{A}_1$ . For  
 907  $\varepsilon \in (\frac{1}{2}, 1)$ , for  $\mathcal{H}_0$ ,  $\hat{A}_1 > 0$  while  $\hat{A}_2 < 0$ . On the other hand, for  $\mathcal{H}_1$ ,  $\hat{A}_1 < 0$  and  $\hat{A}_2 > 0$ . This implies that the algorithm  
 908 should choose  $\mathcal{H}_0$  in order to approximate the advantage. Since the TD loss is the same for both hypotheses, convergence to  
 909 the optimal arm depends on how the algorithm breaks ties. Next, we prove that for the decision-aware loss and any iteration  
 910 such that  $p_t < 0.5$ , the loss for  $\mathcal{H}_0$  is smaller than that for  $\mathcal{H}_1$ , and hence the algorithm chooses the correct hypothesis and  
 911 pulls the optimal arm. For this, we define  $f(p)$  as follows,

$$\begin{aligned} f(p) &:= \left[ p(1 + \varepsilon) \log(1 + \varepsilon) + (1-p) \left(1 - \frac{\varepsilon p}{1-p}\right) \log\left(1 - \frac{\varepsilon p}{1-p}\right) \right] \\ &\quad - \left[ p(1 - \varepsilon) \log(1 - \varepsilon) + (1-p) \left(1 + \frac{\varepsilon p}{1-p}\right) \log\left(1 + \frac{\varepsilon p}{1-p}\right) \right] \end{aligned}$$

For  $f(p)$  to be well-defined, we want that,  $1 - \varepsilon > 0 \implies \varepsilon < 1$  and  $1 - \frac{\varepsilon p}{1-p} > 0 \implies p < \frac{1}{1+\varepsilon}$ . Since  $\varepsilon \in (1/2, 1)$ ,  
 912  $p < \frac{1}{2}$ . In order to prove that the algorithm will always choose  $\mathcal{H}_0$ , we will show that  $f(p) \leq 0$  for all  $p \in [0, 1/2]$  next.  
 First note that,

$$f(0) = 0 \quad ; \quad f(1/2) = \frac{1+\varepsilon}{2} \log(1 + \varepsilon) + \frac{(1-\varepsilon)}{2} \log(1 - \varepsilon) - \frac{1-\varepsilon}{2} \log(1 - \varepsilon) - \frac{1+\varepsilon}{2} \log(1 + \varepsilon) = 0$$

913 Next, we will prove that  $f(p)$  is convex. This combined with the fact  $f(0) = f(1/2) = 0$  implies that  $f(p) < 0$  for all  
 914  $p \in (0, 1/2)$ . For this, we write  $f(p) = g(p) + h_1(p) - h_2(p)$  where,

$$\begin{aligned} g(p) &= p(1 + \varepsilon) \log(1 + \varepsilon) - p(1 - \varepsilon) \log(1 - \varepsilon) \\ h_1(p) &= (1-p) \left(1 - \frac{\varepsilon p}{1-p}\right) \log\left(1 - \frac{\varepsilon p}{1-p}\right) = (1 - \varepsilon' p) \log\left(\frac{1 - \varepsilon' p}{1-p}\right) \quad (\varepsilon' = 1 + \varepsilon) \\ h_2(p) &= (1-p) \left(1 + \frac{\varepsilon p}{1-p}\right) \log\left(1 + \frac{\varepsilon p}{1-p}\right) = (1 - \varepsilon'' p) \log\left(\frac{1 - \varepsilon'' p}{1-p}\right) \quad (\varepsilon'' = 1 - \varepsilon) \end{aligned}$$



915 Differentiating the above terms,

$$\begin{aligned} g'(p) &= (1 + \varepsilon) \log(1 + \varepsilon) - (1 - \varepsilon) \log(1 - \varepsilon) \quad ; \quad g''(p) = 0 \\ h'_1(p) &= -\epsilon' \log\left(\frac{1 - \epsilon' p}{1 - p}\right) + \frac{1 - \epsilon'}{1 - p} \\ h''_1(p) &= -\frac{\epsilon'}{1 - \epsilon' p} \frac{1 - \epsilon'}{1 - p} - \frac{(1 - \epsilon')^2}{(1 - p)^2} = \frac{(\epsilon' - 1)p \left[ (\epsilon' - 1)^2 + \left(\frac{1}{p} - 1\right) \right]}{(1 - \epsilon' p)(1 - p)^2} > 0 \end{aligned}$$

916 Similarly,

$$h''_2(p) = \frac{(\epsilon'' - 1)p \left[ (\epsilon'' - 1)^2 + \left(\frac{1}{p} - 1\right) \right]}{(1 - \epsilon'' p)(1 - p)^2} < 0$$

917 Combining the above terms,  $f''(p) = g''(p) + h''_1(p) - h''_2(p) > 0$  for all  $p \in (0, 1/2)$  and hence  $f(p)$  is convex. Hence,  
 918 for all  $p < \frac{1}{2}$ , minimizing the divergence loss results in choosing  $\mathcal{H}_0$  and the actor pulling the optimal arm. Once the  
 919 probability of pulling the optimal arm is larger than 0.5, both hypotheses are identical and the algorithm will converge to  
 920 the optimal arm regardless of the hypothesis chosen.  $\square$

## 921 E.2 Lemmas

922 **Lemma 24.** For a probability distribution  $p \in \mathbb{R}^A$ , the negative entropy mirror map  $\phi(p) = \sum_i p_i \log(p_i)$ ,  $\delta \in \mathbb{R}^A$ ,  
 923  $c > 0$ ,

$$D_{\phi^*} \left( \nabla \phi(p) - c \delta, \nabla \phi(p) \right) = c \langle p, \delta \rangle + \log \left( \sum_j p_j \exp(-c \delta_j) \right).$$

924

925 *Proof.* In this case,  $[\nabla \phi(p)]_i = 1 + \log(p_i)$ . Hence, we need to compute  $D_{\phi^*}(z', z)$  where  $z'_i := 1 + \log(p_i) - c \delta_i$  and  
 926  $z_i := 1 + \log(p_i)$ . If  $\phi(p) = \sum_i p_i \log(p_i)$ , using Lemma 26,  $\phi^*(z) = \log(\sum_i \exp(z_i))$  where  $z_i = \log(\sum_i \exp(z_i)) =$   
 927  $\log(p_i)$ .

928 Define distribution  $q$  such that  $q_i := \frac{\exp(1 + \log(p_i) - c \delta_i)}{\sum_j \exp(1 + \log(p_j) - c \delta_j)}$ . Using Lemma 28,

$$D_{\phi^*}(z', z) = \text{KL}(p||q) = \sum_i p_i \log \left( \frac{p_i}{q_i} \right)$$

929 Simplifying  $q$ ,

$$\begin{aligned} q_i &= \frac{\exp(1 + \log(p_i) - c \delta_i)}{\exp(\sum_j (1 + \log(p_j) - c \delta_j))} = \frac{p_i \exp(-c \delta_i)}{\sum_j p_j \exp(-c \delta_j)} \\ \implies D_{\phi^*}(z', z) &= \sum_i p_i \log \left( \frac{p_i \sum_j p_j \exp(-c \delta_j)}{p_i \exp(-c \delta_i)} \right) = \sum_i p_i \log \left( \exp(c \delta_i) \sum_j p_j \exp(-c \delta_j) \right) \\ &= c \sum_i p_i \delta_i + \sum_i p_i \log \left( \sum_j p_j \exp(-c \delta_j) \right) = c \langle p, \delta \rangle + \log \left( \sum_j p_j \exp(-c \delta_j) \right) \end{aligned}$$

930  $\square$

931 **Lemma 25.** For  $z \in \mathbb{R}^A$ , the log-sum-exp mirror map  $\phi(z) = \log(\sum_i \exp(z_i))$ ,  $\delta \in \mathbb{R}^A$  s.t.  $\sum_i \delta_i = 0$ ,  $c > 0$ ,

$$D_{\phi^*} \left( \nabla \phi(z) - c\delta, \nabla \phi(z) \right) = \sum_i (p_i - c\delta_i) \log \left( \frac{p_i - c\delta_i}{p_i} \right),$$

932 where  $p_i = \frac{\exp(z_i)}{\sum_j \exp(z_j)}$ .

933 *Proof.* In this case,  $[\nabla \phi(z)]_i = \frac{\exp(z_i)}{\sum_j \exp(z_j)} = p_i$ . Define distribution  $q$  s.t.  $q_i := p_i - c\delta_i$ . Note that since  $\sum_i \delta_i = 0$ ,  
 934  $\sum_i q_i = \sum_i p_i = 1$  and hence,  $q$  is a valid distribution. We thus need to compute  $D_{\phi^*}(q, p)$ . Using Lemma 26,  
 935  $\phi^*(p) = \sum_i p_i \log(p_i)$  where  $p_i = \frac{\exp(z_i)}{\sum_j \exp(z_j)}$ . Using Lemma 27,

$$D_{\phi^*}(q, p) = \text{KL}(q||p) = \sum_i (p_i - c\delta_i) \log \left( \frac{p_i - c\delta_i}{p_i} \right)$$

936 □

937 **Lemma 26.** The log-sum-exp mirror map on the logits and the negative entropy mirror map on the corresponding probability  
 938 distribution are Fenchel duals. In particular for  $z \in \mathbb{R}^d$ , if  $\phi(z) := \log(\sum_i \exp(z_i))$ , then  $\phi^*(p) = \sum_i p_i \log(p_i)$  where  
 939  $p_i = \frac{\exp(z_i)}{\sum_j \exp(z_j)}$ . Similarly, if  $\phi(p) = \sum_i p_i \log(p_i)$ , then  $\phi^*(z) = \log(\sum_i \exp(z_i))$  where  $z_i = \log(\sum_i \exp(z_i)) =$   
 940  $\log(p_i)$ .

941 *Proof.* If  $\phi(z) := \log(\sum_i \exp(z_i))$ ,

$$\phi^*(p) := \sup_z [\langle p, z \rangle - \phi(z)] = \sup_z \left[ \sum_i p_i z_i - \log \left( \sum_i \exp(z_i) \right) \right]$$

Setting the gradient to zero, we get that  $p_i = \frac{\exp(z_i^*)}{\sum_j \exp(z_j^*)}$  for  $z^* \in \mathcal{Z}^*$  where  $\mathcal{Z}^*$  is the set of maxima related by a shift (i.e.  
 942 if  $z^* \in \mathcal{Z}^*$ ,  $z^* + C \in \mathcal{Z}^*$  for a constant  $C$ ). Using the optimality condition, we know that  $\sum_i p_i = 1$  and

$$\log(p_i) = z_i^* - \log \left( \sum_j \exp(z_j^*) \right) \implies z_i^* = \log(p_i) + \phi(z^*)$$

943 Using this relation,

$$\begin{aligned} \phi^*(p) &= \left[ \sum_i p_i z_i^* - \log \left( \sum_i \exp(z_i^*) \right) \right] = \left[ \sum_i p_i \log(p_i) + \phi(z^*) \sum_i p_i - \phi(z^*) \right] \\ \implies \phi^*(p) &= \sum_i p_i \log(p_i) \end{aligned}$$

944 The second statement follows since the  $\phi^*(\phi^*) = \phi$ . □

945 **Lemma 27.** For probability distributions,  $p$  and  $p'$ , if  $\phi(p) = \sum_i p \log(p_i)$ , then  $D_\phi(p, p') = \text{KL}(p||p')$ .

946 *Proof.* Note that  $[\nabla \phi(p)]_i = 1 + \log(p_i)$ . Using the definition of the Bregman divergence,

$$\begin{aligned} D_\phi(p, p') &:= \phi(p) - \phi(p') - \langle \nabla \phi(p'), p - p' \rangle \\ &= \sum_i [p_i \log(p_i) - p'_i \log(p'_i) - (1 + \log(p'_i))(p_i - p'_i)] \\ &= \sum_i \left[ p_i \log \left( \frac{p_i}{p'_i} \right) \right] - \sum_i p_i + \sum_i p'_i \end{aligned}$$

947 Since  $p$  and  $p'$  are valid probability distributions,  $\sum_i p_i = \sum_i p'_i = 1$ , and hence,  $D_\phi(p, p') = \text{KL}(p||p')$ . □

948 **Lemma 28.** If  $\phi(z) = \log(\sum_i \exp(z_i))$ , then  $D_\phi(z, z') = \text{KL}(p' || p)$ , where  $p_i := \frac{\exp(z_i)}{\sum_j \exp(z_j)}$  and  $p'_i := \frac{\exp(z'_i)}{\sum_j \exp(z'_j)}$ .

949 *Proof.* Note that  $[\nabla \phi(z)]_i = \frac{\exp(z_i)}{\sum_j \exp(z_j)} = p_i$  where  $p_i := \frac{\exp(z_i)}{\sum_j \exp(z_j)}$ . Using the definition of the Bregman divergence,

$$\begin{aligned}
D_\phi(z, z') &:= \phi(z) - \phi(z') - \langle \nabla \phi(z'), z - z' \rangle \\
&= \log \left( \sum_j \exp(z_j) \right) - \log \left( \sum_j \exp(z'_j) \right) - \sum_i \left[ \frac{\exp(z'_i)}{\sum_j \exp(z'_j)} (z_i - z'_i) \right] \\
&= \sum_i p'_i \left[ \log \left( \sum_j \exp(z_j) \right) - \log \left( \sum_j \exp(z'_j) \right) - z_i + z'_i \right] \quad (\text{Since } \sum_i p'_i = 1) \\
&= \sum_i p'_i \left[ \log \left( \sum_j \exp(z_j) \right) - \log \left( \sum_j \exp(z'_j) \right) - \log(\exp(z_i)) + \log(\exp(z'_i)) \right] \\
&= \sum_i p'_i \left[ \log \left( \frac{\exp(z'_i)}{\sum_j \exp(z'_j)} \right) - \log \left( \frac{\exp(z_i)}{\sum_j \exp(z_j)} \right) \right] \\
&= \sum_i p'_i [\log(p'_i) - \log(p_i)] = \sum_i p'_i \left[ \log \left( \frac{p'_i}{p_i} \right) \right] = \text{KL}(p' || p)
\end{aligned}$$

950

□

## F Implementation Details

### F.1 Heuristic to estimate $c$

We estimate  $c$  to maximize the lower-bound on  $J(\pi)$ . In particular, using Prop. 1,

$$J(\pi) \geq J(\pi_t) + \hat{g}(\pi_t)^\top (\pi - \pi_t) - \left( \frac{1}{\eta} + \frac{1}{c} \right) D_\Phi(\pi, \pi_t) - \frac{1}{c} D_{\Phi^*} \left( \nabla \Phi(\pi_t) - c[\nabla J(\pi_t) - \hat{g}(\pi_t)], \nabla \Phi(\pi_t) \right)$$

For a fixed  $\hat{g}(\pi_t)$ , we need to maximize the RHS w.r.t  $\pi$  and  $c$ , i.e.

$$\max_{c>0} \max_{\pi \in \Pi} J(\pi_t) + \hat{g}(\pi_t)^\top (\pi - \pi_t) - \left( \frac{1}{\eta} + \frac{1}{c} \right) D_\Phi(\pi, \pi_t) - \frac{1}{c} D_{\Phi^*} \left( \nabla \Phi(\pi_t) - c[\nabla J(\pi_t) - \hat{g}(\pi_t)], \nabla \Phi(\pi_t) \right) \quad (6)$$

Instead of maximizing w.r.t  $\pi$  and  $c$ , we will next aim to find an upper-bound on the RHS that is independent of  $\pi$  and aim to maximize it w.r.t  $c$ . Using Lemma 9 with  $y' = \pi$ ,  $y = \pi_t$ ,  $x = -\hat{g}(\pi_t)$  and define  $c'$  such that  $\frac{1}{c'} = \frac{1}{\eta} + \frac{1}{c}$ .

$$\begin{aligned} \langle -\hat{g}(\pi_t), \pi - \pi_t \rangle &\geq -\frac{1}{c'} [D_\Phi(\pi, \pi_t) + D_\Phi^*(\nabla \Phi(\pi_t) + c'\hat{g}(\pi_t), \nabla \Phi(\pi_t))] \\ \implies J(\pi_t) + \langle \hat{g}(\pi_t), \pi - \pi_t \rangle - \left( \frac{1}{\eta'} + \frac{1}{c} \right) D_\Phi(\pi, \pi_t) &\leq J(\pi_t) + \frac{1}{c'} D_\Phi^*(\nabla \Phi(\pi_t) + c'\hat{g}(\pi_t), \nabla \Phi(\pi_t)) \end{aligned}$$

Using the above upper-bound in Eq. (6),

$$\max_{c>0} \left[ J(\pi_t) + \frac{1}{c'} D_\Phi^*(\nabla \Phi(\pi_t) + c'\hat{g}(\pi_t), \nabla \Phi(\pi_t)) - \frac{1}{c} D_{\Phi^*} \left( \nabla \Phi(\pi_t) - c[\nabla J(\pi_t) - \hat{g}(\pi_t)], \nabla \Phi(\pi_t) \right) \right]$$

This implies that the estimate  $\hat{c}$  can be calculated as:

$$\hat{c} = \arg \max_{c>0} \left\{ \left( \frac{1}{\eta} + \frac{1}{c} \right) D_\Phi^* \left( \nabla \Phi(\pi_t) + \frac{1}{\left( \frac{1}{\eta} + \frac{1}{c} \right)} \hat{g}(\pi_t), \nabla \Phi(\pi_t) \right) - \frac{1}{c} D_{\Phi^*} \left( \nabla \Phi(\pi_t) - c[\nabla J(\pi_t) - \hat{g}(\pi_t)], \nabla \Phi(\pi_t) \right) \right\}$$

In order to gain some intuition, let us consider the case where  $D_\Phi(u, v) = \frac{1}{2} \|u - v\|_2^2$ . In this case,

$$\hat{c} = \arg \max_{c>0} \left\{ \frac{\|\hat{g}(\pi_t)\|_2^2}{2 \left( \frac{1}{\eta} + \frac{1}{c} \right)} - \frac{c}{2} \|\hat{g}(\pi_t) - \nabla J(\pi_t)\|_2^2 \right\}$$

If  $\|\hat{g}(\pi_t) - \nabla J(\pi_t)\|_2^2 \rightarrow 0$ ,

$$\hat{c} = \arg \max_{c>0} \left\{ \frac{\|\hat{g}(\pi_t)\|_2^2}{2 \left( \frac{1}{\eta} + \frac{1}{c} \right)} \right\} \implies c \rightarrow \infty$$

If  $\|\hat{g}(\pi_t) - \nabla J(\pi_t)\|_2^2 \rightarrow \infty$ ,

$$\hat{c} = \arg \max_{c>0} \left\{ -\frac{c}{2} \right\} \implies c \rightarrow 0$$

### F.2 Environments and constructing features

**Cliff World:** We consider a modified version of the CliffWorld environment [52, Example 6.6]. The environment is deterministic and consists of 21 states and 4 actions. The objective is to reach the Goal state as quickly as possible. If the agent falls into a Cliff, it yields reward of  $-100$ , and is then returned to the Start state. Reaching the Goal state yields a reward of  $+1$ , and the agent will stay in this terminal state. All other transitions are associated with a zero reward, and the discount factor is set to  $\gamma = 0.9$ .

**Frozen Lake:** We Consider the Frozen Lake v.1 environment from gym framework [6]. The environment is stochastic and consists of 16 states and 4 actions. The agent starts from the Start state and according to the next action (chosen by the policy) and the stochastic dynamics moves to the next state and yields a reward. The objective is to reach the Goal state as quickly as possible without entering the Hole States. All the Hole states and the Goal are terminal states. Reaching the goal state yields  $+1$  reward and all other rewards are zero, and the discount factor is set to  $\gamma = 0.9$ .

973 **Sampling:** We employ the Monte-Carlo method to sample from both environments and we use the expected return to  
 974 estimate the action-value function  $Q$ . Specifically, we iteratively start from a randomly chosen state-action pair  $(s, a)$ , run a  
 975 roll-out with a specified length starting from that pair, and collect the expected return to estimate  $Q(s, a)$ .

976 **Constructing features:** Also, in order to use function approximation on the above environments, we use tile-coded  
 977 features [52]. Specifically, tile-coded featurization needs three parameters to be set: (i) hash table size (equivalent  
 978 to the feature dimension)  $d$ , (ii) number of tiles  $N$  and (iii) size of tiles  $s$ . For Cliff world environment, we consider  
 979 following pairs to construct features:  $\{(d = 40, N = 5, s = 1), (d = 50, N = 6, s = 1), (d = 60, N = 4, s = 3), (d =$   
 980  $80, N = 5, s = 3), (d = 100, N = 6, s = 3)\}$ . This means whenever we use  $d = 40$ , the number of tiles is  $N = 5$  and  
 981 the tiling size is  $s = 1$ . The reported number of tiles and tiling size parameters are tuned and have achieved the best  
 982 performance for all algorithms. Similarly for Frozen Lake environment, we use the following pairs to construct features:  
 983  $\{(d = 40, N = 3, s = 3), (d = 50, N = 4, s = 13), (d = 60, N = 5, s = 3), (d = 100, N = 8, s = 3)\}$ .

### 984 F.3 Critic optimization

985 We explain implementation of TD, advantage-TD and decision-aware critic loss functions. We use tile-coded features  
 986  $\mathbf{X}(s, a)$  and linear function approximation to estimate action-value function  $Q$ , implying that  $\hat{Q}(s, a) = \omega^T \mathbf{X}(s, a)$  where  
 987  $\omega, \mathbf{X}(s, a) \in \mathbb{R}^d$ .

988 **Baselines:** For policy  $\pi$ , the TD objective is to return the  $\omega$  that minimizes the squared norm error of the action-value  
 989 function  $Q^\pi$  across all state-actions weighted by the state-action occupancy measure  $\mu^\pi(s, a)$ .

$$\omega^{\text{TD}} = \arg \min_{\omega \in \mathbb{R}^d} \mathbb{E}_{(s,a) \sim \mu^\pi(s,a)} [Q^\pi(s, a) - \omega^T \mathbf{X}(s, a)]^2$$

990 Taking the derivative with respect to  $\omega$  and setting it to zero:

$$\begin{aligned} & \mathbb{E}_{(s,a) \sim \mu^\pi(s,a)} \left[ (Q^\pi(s, a) - \omega^T \mathbf{X}(s, a)) \mathbf{X}(s, a)^T \right] = 0 \\ \implies & \underbrace{\sum_{s,a} \mu^\pi(s, a) Q^\pi(s, a) \mathbf{X}(s, a)^T}_{:=y} = \underbrace{\left[ \sum_{s,a} \mu^\pi(s, a) \mathbf{X}(s, a) \mathbf{X}(s, a)^T \right] \omega}_{:=K} \end{aligned}$$

991 Given features  $\mathbf{X}$ , the true action-value function  $Q^\pi$  and state-action occupancy measure  $\mu^\pi$ , we can compute  $K$ ,  $y$  and  
 992 solve  $\omega^{\text{TD}} = K^{-1}y$ .

993 Similarly for policy  $\pi$ , the advantage-TD objective is to return  $\omega$  that minimizes the squared error of the advantage function  
 994  $A^\pi$  across all state-actions weighted by the state-action occupancy measure  $\mu^\pi$ .

$$\omega^{\text{Adv-TD}} = \arg \min_{\omega \in \mathbb{R}^d} \mathbb{E}_{(s,a) \sim \mu^\pi(s,a)} \left[ A^\pi(s, a) - \omega^T (\mathbf{X}(s, a) - \sum_{a'} \mathbf{X}(s, a')) \right]^2$$

995 Taking the derivative with respect to  $\omega$  and setting it to zero:

$$\begin{aligned} & \mathbb{E}_{(s,a) \sim \mu^\pi(s,a)} \left[ \left[ A^\pi(s, a) - \omega^T (\mathbf{X}(s, a) - \sum_{a'} \mathbf{X}(s, a')) \right] \left[ \mathbf{X}(s, a) - \sum_{a'} \mathbf{X}(s, a') \right]^T \right] = 0 \\ \implies & \underbrace{\sum_{s,a} \mu^\pi(s, a) A^\pi(s, a) \left[ \mathbf{X}(s, a) - \sum_{a'} \mathbf{X}(s, a') \right]^T}_{:=y} = \underbrace{\sum_{s,a} \mu^\pi(s, a) \left[ \mathbf{X}(s, a) - \sum_{a'} \mathbf{X}(s, a') \right] \left[ \mathbf{X}(s, a) - \sum_{a'} \mathbf{X}(s, a') \right]^T \omega}_{:=K} \end{aligned}$$

996 Given features  $\mathbf{X}$ , the true advantage function  $A^\pi$  and state-action occupancy measure  $\mu^\pi$ , we can compute  $K$  and  $y$  and  
 997 solve  $\omega^{\text{Adv-TD}} = K^{-1}y$ .

998 **Decision-aware critic in direct representation:** Recall that for policy  $\pi$ , the decision-aware critic loss in direct representa-  
 999 tion is the blue term in Prop. 4, which after linear parameterization on  $\hat{Q}^\pi$  would be as follows:

$$\mathbb{E}_{s \sim d^\pi} \left[ \mathbb{E}_{a \sim p^\pi(\cdot|s)} [Q^\pi(s, a) - \omega^T \mathbf{X}(s, a)] + \frac{1}{c} \log \left( \mathbb{E}_{a \sim p^\pi(\cdot|s)} [\exp(-c [Q^\pi(s, a) - \omega^T \mathbf{X}(s, a)])] \right) \right]$$

1000 The above term is a convex function of  $\omega$  for any  $c > 0$ . We minimize the term using gradient descent, where the gradient  
 1001 with respect to  $\omega$  is:

$$-\mathbb{E}_{s \sim d^\pi} \left[ \mathbb{E}_{a \sim p^\pi(\cdot|s)} \mathbf{X}(s, a) - \frac{\mathbb{E}_{a \sim p^\pi(\cdot|s)} [\exp(-c [Q^\pi(s, a) - \omega^T \mathbf{X}(s, a)]) \mathbf{X}(s, a)]}{\mathbb{E}_{a \sim p^\pi(\cdot|s)} [\exp(-c [Q^\pi(s, a) - \omega^T \mathbf{X}(s, a)])]} \right]$$

1002 The step-size of gradient ascent is determined using Armijo line-search [3] where the maximum step size is set to 1000 and  
 1003 it decays with the rate  $\beta = 0.9$ . The number of iteration for critic inner-loop,  $m_c$  in Algorithm 1, is set to 10000, and if the  
 1004 gradient norm becomes smaller than  $10^{-6}$  we terminate the inner loop.

1005 **Decision-aware critic in softmax representation:** Recall that for policy  $\pi$ , the decision-aware critic loss in softmax  
 1006 representation is the blue term in Prop. 6, which after linear parameterization on  $\hat{Q}^\pi$  and substituting  $\hat{A}^\pi(s, a)$  with  
 1007  $\omega^T (\mathbf{X}(s, a) - \sum_{a'} \mathbf{X}(s, a'))$  would be as follows:

$$\frac{1}{c} \mathbb{E}_{s \sim d^{\pi_t}} \mathbb{E}_{a \sim p^{\pi_t}(\cdot|s)} \left[ \left( 1 - c [A^{\pi_t}(s, a) - \omega^T (\mathbf{X}(s, a) - \sum_{a'} \mathbf{X}(s, a'))] \right) \log \left( 1 - c [A^{\pi_t}(s, a) - \omega^T (\mathbf{X}(s, a) - \sum_{a'} \mathbf{X}(s, a'))] \right) \right]$$

1008 Similarly, the above term is convex with respect to  $\omega$  and we minimize it using gradient descent. The step-size is determined  
 1009 using Armijo line-search with the same parameters as mentioned in direct case. The number of iterations in inner loop is  
 1010 set to 10000 and we terminate the loop if the gradient norm becomes smaller than  $10^{-8}$ . The gradient with respect to  $\omega$ :

$$E_{s \sim d^{\pi_t}} \mathbb{E}_{a \sim p^{\pi_t}(\cdot|s)} \left[ \left( 1 + \log \left( 1 - c [A^{\pi_t}(s, a) - \omega^T (\mathbf{X}(s, a) - \sum_{a'} \mathbf{X}(s, a'))] \right) \right) (\mathbf{X}(s, a) - \sum_{a'} \mathbf{X}(s, a')) \right]$$

#### 1011 F.4 Actor optimization

1012 **Direct representation:** For all actor-critic algorithms, we maximize the green term in Prop. 4 known as MDPO [55].

$$\mathbb{E}_{s \sim d^{\pi_t}} \left[ \mathbb{E}_{a \sim p^{\pi_t}(\cdot|s)} \left[ \frac{p^\pi(a|s)}{p^{\pi_t}(a|s)} \left( \hat{Q}^{\pi_t}(s, a) - \left( \frac{1}{\eta} + \frac{1}{c} \right) \log \left( \frac{p^\pi(a|s)}{p^{\pi_t}(a|s)} \right) \right) \right] \right]$$

1013 In tabular parameterization of the actor,  $\theta_{s,a} = p^\pi(s, a)$ , the actor update is exactly natural policy gradient [24] and can be  
 1014 solved in closed-form. We refer the reader to Appendix F.2 of [56] for explicit derivation. At iteration  $t$ , given policy  $\pi_t$ ,  
 1015 the estimated action-value function from the critic  $\hat{Q}^{\pi_t}$  and  $\eta$  as the functional step-size, the update at iteration  $t$  is:

$$p^{\pi_{t+1}}(a|s) = \frac{p^{\pi_t}(a|s) \exp(\eta \hat{Q}^{\pi_t}(s, a))}{\sum_{a'} p^{\pi_t}(a'|s) \exp(\eta \hat{Q}^{\pi_t}(s, a'))} \implies \theta_{s,a} = \frac{\theta_{s,a} \exp(\eta \hat{Q}^{\pi_t}(s, a))}{\sum_{a'} \theta_{s,a'} \exp(\eta \hat{Q}^{\pi_t}(s, a'))}$$

1016 When we linearly parameterize the policy, implying that for policy  $\pi$ ,  $p^\pi(a|s) = \frac{\exp(\theta^T \mathbf{X}(s, a))}{\sum_{a'} \exp(\theta^T \mathbf{X}(s, a'))}$  where  $\theta, \mathbf{X}(s, a) \in \mathbb{R}^n$   
 1017 and  $n$  is the actor expressivity, we use the off-policy update loop (Lines 10-13 in Algorithm 1) and we iteratively update the  
 1018 parameters using gradient ascent. The MDPO objective with linear parameterization will be:

$$\mathbb{E}_{s \sim d^{\pi_t}} \left[ \mathbb{E}_{a \sim p^{\pi_t}(\cdot|s)} \left[ \frac{\exp(\theta^T \mathbf{X}(s, a))}{p^{\pi_t}(a|s) \sum_{a'} \exp(\theta^T \mathbf{X}(s, a'))} \left( \hat{Q}^{\pi_t}(s, a) - \left( \frac{1}{\eta} + \frac{1}{c} \right) \log \left( \frac{\exp(\theta^T \mathbf{X}(s, a))}{p^{\pi_t}(a|s) \sum_{a'} \exp(\theta^T \mathbf{X}(s, a'))} \right) \right) \right] \right]$$

1019 And the gradient of objective with respect to  $\theta$  is:

$$\mathbb{E}_{s \sim d^{\pi_t}} \left[ \mathbb{E}_{a \sim p^{\pi_t}(\cdot|s)} \left[ \frac{p^\pi(a|s)}{p^{\pi_t}(a|s)} \left( \mathbf{X}(s, a) - \frac{\sum_{a'} \exp(\theta^T \mathbf{X}(s, a')) \mathbf{X}(s, a')}{\sum_{a'} \exp(\theta^T \mathbf{X}(s, a'))} \right) \left( \hat{Q}^{\pi_t}(s, a) - \left( \frac{1}{\eta} + \frac{1}{c} \right) (1 + \log(\frac{p^\pi(a|s)}{p^{\pi_t}(a|s)})) \right) \right] \right]$$

1020 **Softmax representation:** For all actor-critic algorithms, we maximize the green term in Prop. 6 known as sMDPO [56].

$$\mathbb{E}_{s \sim d^{\pi_t}} \mathbb{E}_{a \sim p^{\pi_t}(\cdot|s)} \left[ \left( \hat{A}^{\pi_t}(s, a) + \frac{1}{\eta} + \frac{1}{c} \right) \log \left( \frac{p^\pi(a|s)}{p^{\pi_t}(a|s)} \right) \right]$$

1021 In tabular parameterization of the actor,  $\theta_{s,a} = p^\pi(s, a)$ , at iteration  $t$  given the policy  $\pi_t$ , the estimated advantage function  
 1022 from the critic  $\hat{A}^{\pi_t}(s, a) = \hat{Q}^{\pi_t}(s, a) - \sum_{a'} p^{\pi_t}(a|s) \hat{Q}^{\pi_t}(s, a')$ , and functional step-size  $\eta$ , the actor update can be solved  
 1023 in closed-form and is as follows:

$$p^{\pi_{t+1}}(a|s) = \frac{p^{\pi_t}(a|s) \max(1 + \eta A^{\pi_t}(s, a), 0)}{\sum_{a'} p^{\pi_t}(a'|s) \max(1 + \eta A^{\pi_t}(s, a'), 0)} \implies \theta_{s,a} = \frac{\theta_{s,a} \max(1 + \eta A^{\pi_t}(s, a), 0)}{\sum_{a'} \theta_{s,a'} \max(1 + \eta A^{\pi_t}(s, a'), 0)}$$

1024 We refer the reader to Appendix F.1 of [56] for explicit derivation. When we linearly parameterize the policy, implying that  
1025 for policy  $\pi$ ,  $p^\pi(a|s) = \frac{\exp(\theta^T \mathbf{X}(s,a))}{\sum_{a'} \exp(\theta^T \mathbf{X}(s,a'))}$ , we need to maximize the following with respect to  $\theta$ :

$$\mathbb{E}_{s \sim d^{\pi_t}} \mathbb{E}_{a \sim p^{\pi_t}(\cdot|s)} \left[ \left( \hat{A}^{\pi_t}(s, a) + \frac{1}{\eta} + \frac{1}{c} \right) \log \left( \frac{\exp(\theta^T \mathbf{X}(s, a))}{p^{\pi_t}(a|s) \sum_{a'} \exp(\theta^T \mathbf{X}(s, a'))} \right) \right]$$

1026 Similar to direct representation, we use the off-policy update loop and we iteratively update the parameters using gradient  
1027 ascent. The gradient with respect to  $\theta$  is:

$$\mathbb{E}_{s \sim d^{\pi_t}} \mathbb{E}_{a \sim p^{\pi_t}(\cdot|s)} \left[ \left( \hat{A}^{\pi_t}(s, a) + \frac{1}{\eta} + \frac{1}{c} \right) \left( \mathbf{X}(s, a) - \frac{\sum_{a'} \exp(\theta^T \mathbf{X}(s, a)) \mathbf{X}(s, a')}{\sum_{a'} \exp(\theta^T \mathbf{X}(s, a))} \right) \right]$$

## 1028 F.5 Parameter Tuning

|                      | Parameter                                | Value/Range                  |
|----------------------|------------------------------------------|------------------------------|
| <b>Sampling</b>      | # of samples                             | {1000, 5000}                 |
|                      | length of episode                        | {20, 50}                     |
| <b>Actor</b>         | Gradient termination criterion           | $\{10^{-3}, 10^{-4}\}$       |
|                      | $m_a$                                    | {1000, 10000}                |
|                      | Armijo max step-size                     | 1000                         |
|                      | Armijo step-size decay $\beta$           | 0.9                          |
|                      | Policy initialization (linear)           | $\mathcal{N}(0, 0.1)$        |
|                      | Policy initialization (tabular)          | Random                       |
| <b>Linear Critic</b> | Gradient termination criterion (direct)  | $\{10^{-6}, 10^{-8}\}$       |
|                      | Gradient termination criterion (softmax) | $\{10^{-8}, 10^{-10}\}$      |
|                      | $m_c$                                    | {1000, 10000}                |
|                      | Armijo max step-size                     | 1000                         |
|                      | Armijo step-size decay $\beta$           | 0.9                          |
| <b>Others</b>        | $\eta$ in direct                         | {0.001, 0.005, 0.01, 0.1, 1} |
|                      | $c$ in direct                            | {0.001, 0.01, 0.1, 1}        |
|                      | $\eta$ in softmax                        | {0.001, 0.005, 0.01, 0.1, 1} |
|                      | $c$ in softmax                           | {0.001, 0.01, 0.1}           |
|                      | $d$                                      | {40, 50, 60, 80, 100}        |

Table 1: Parameters for the Cliff World environment

|                      | Parameter                                | Value/Range            |
|----------------------|------------------------------------------|------------------------|
| <b>Sampling</b>      | # of samples                             | {1000, 10000}          |
|                      | length of episode                        | {20, 50}               |
| <b>Actor</b>         | Gradient termination criterion           | $\{10^{-4}, 10^{-5}\}$ |
|                      | $m_a$                                    | {100, 1000}            |
|                      | Armijo max step-size                     | 1000                   |
|                      | Armijo step-size decay $\beta$           | 0.9                    |
|                      | Policy initialization (linear)           | $\mathcal{N}(0, 0.1)$  |
|                      | Policy initialization (tabular)          | Random                 |
| <b>Linear Critic</b> | Gradient termination criterion (direct)  | $\{10^{-6}, 10^{-8}\}$ |
|                      | Gradient termination criterion (softmax) | $\{10^{-6}, 10^{-8}\}$ |
|                      | $m_c$                                    | {10000, 1000000}       |
|                      | Armijo max step-size                     | 1000                   |
|                      | Armijo step-size decay $\beta$           | 0.9                    |
| <b>Others</b>        | $\eta$ in direct                         | {0.01, 0.1, 1, 10}     |
|                      | $c$ in direct                            | {0.01, 0.1, 1}         |
|                      | $\eta$ in softmax                        | {0.01, 0.1, 1, 10}     |
|                      | $c$ in softmax                           | {0.01, 0.1}            |
|                      | $d$                                      | {40, 50, 60, 100}      |

Table 2: Parameters for the Frozen Lake environment



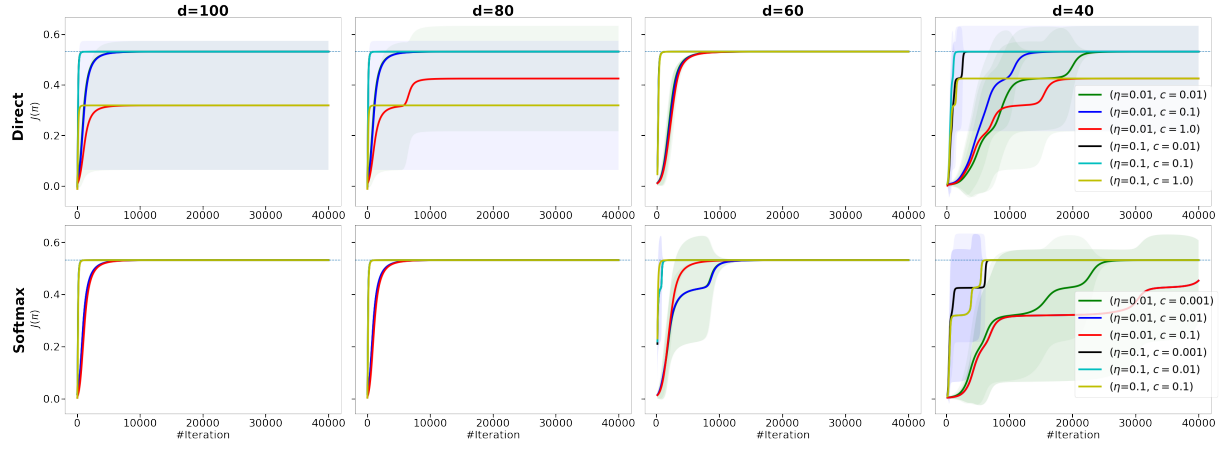

**Figure 2: Cliff World – Linear actor and Linear critic with exact  $Q$  computation** Assessing the impact of  $c$  (trade-off parameter in decision-aware framework) on the performance. We perform the experiment on the same setting as Fig. 1, linear actor and linear (with four different dimensions) critic with known MDP on Cliff World environment. We consider two values of functional step-size  $\eta \in \{0.01, 0.1\}$  and three values of  $c \in \{0.01, 0.1, 1\}$  for direct and  $c \in \{0.001, 0.01, 0.1\}$  for softmax representations, and compare the performance of 6 combinations. Overall, among different critic capacities and step-sizes, the value of  $c = 0.01$  demonstrates superior performance in both policy representations.

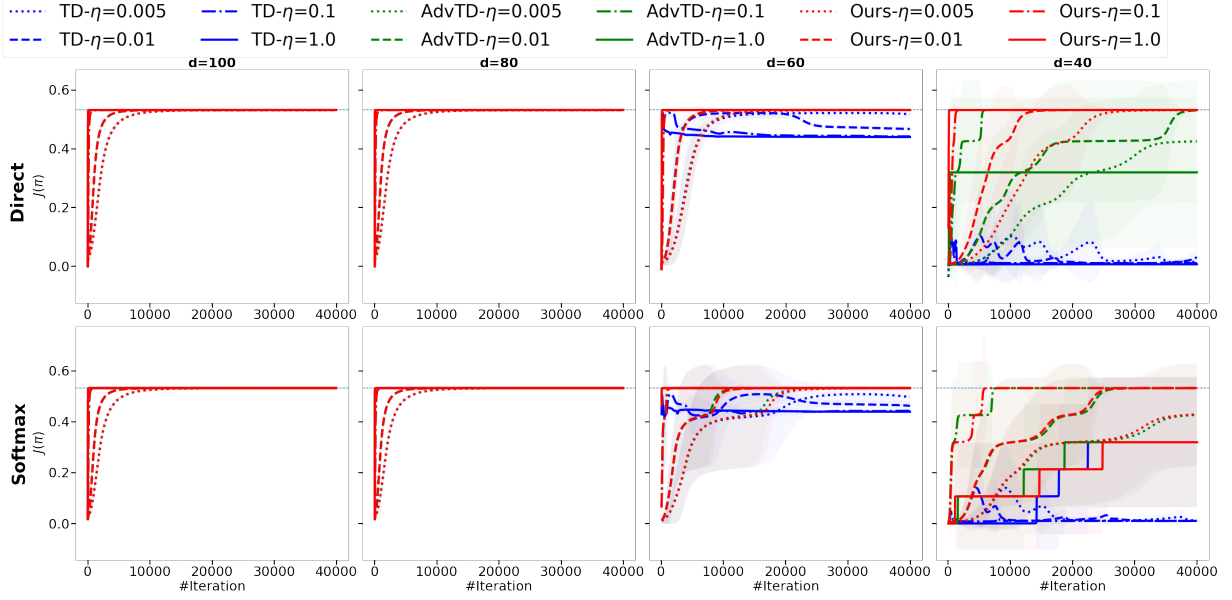

(a) Linear policy parameterization

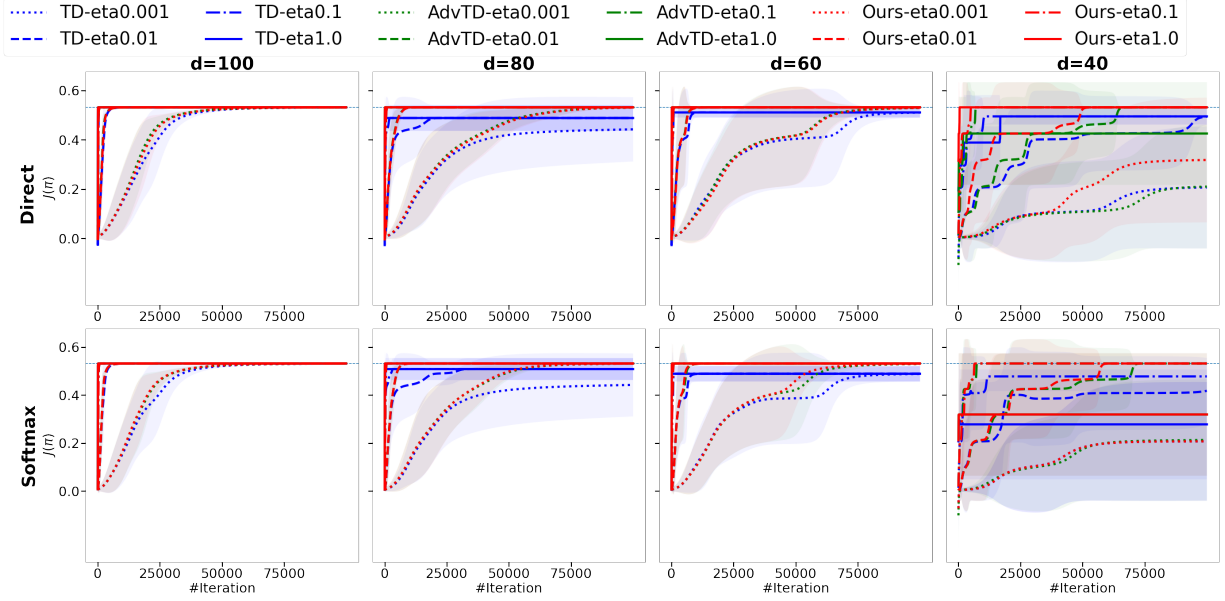

(b) Tabular policy parameterization

**Figure 3: Cliff World – Linear/Tabular actor and Linear critic with exact  $Q$  computation:** Comparison of decision-aware, AdvTD, and TD loss functions using a linear actor Fig. 3a and Fig. 3b coupled with a linear (with four different dimensions) critic in the Cliff World environment for direct and softmax policy representations with known MDP. For  $d = 100$  (corresponding to an expressive critic) in both actor parameterizations and  $d = 80$  in linear parameterization, all algorithms have almost the same performance. In other scenarios, minimizing TD loss function with any functional step-size leads to a sub-optimal policy. In contrast, minimizing Adv-TD and decision-aware loss functions always result in reaching the optimal policy even in the less expressive critic  $d = 40$ . Additionally, decision-aware convergence is faster than Adv-TD particularly when the critic has limited capacity (e.g. In  $d = 40$  for direct and softmax representations and for both actor parameterizations, decision-aware reaches the optimal policy faster.)

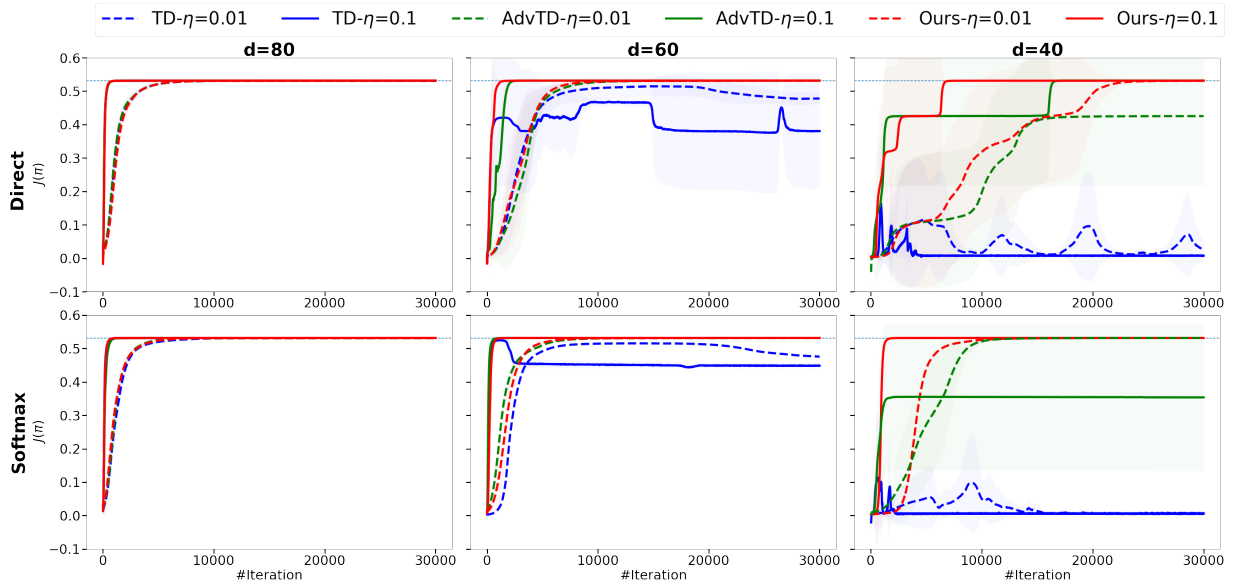

(a) Linear policy parameterization

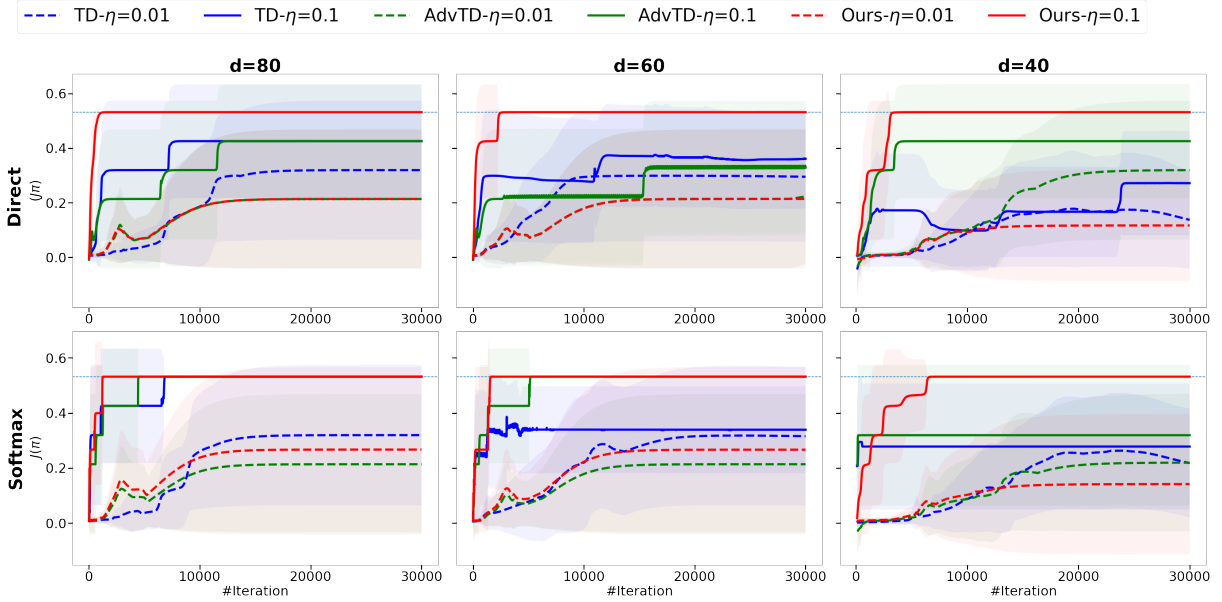

(b) Tabular policy parameterization

**Figure 4: Cliff World – Linear/Tabular actor and Linear critic with estimated  $Q$ :** Comparison of decision-aware, AdvTD, and TD loss functions using a linear actor Fig. 4a and Fig. 4b coupled with a linear (with three different dimensions) critic in the Cliff World environment for direct and softmax policy representations with Monte-Carlo sampling. When employing a linear actor alongside an expressive critic ( $d = 80$ ), all algorithms have nearly identical performance. However, minimizing the TD loss with a linear actor and a less expressive critic ( $d = 40, 60$ ) leads to a loss of monotonic policy improvement and converging towards a sub-optimal policy in both representations. Conversely, minimizing the decision-aware and AdvTD losses enables reaching the optimal policy. Notably, decision-aware demonstrates a faster rate of convergence when the critic has limited capacity (e.g.,  $d = 40$ ) in both policy representations. The disparity among algorithms becomes more apparent when using tabular parameterization. In this case, the decision-aware loss either achieves a faster convergence rate (in  $d = 80$  and  $d = 60$ ), or it alone reaches the optimal policy ( $d = 40$ ).

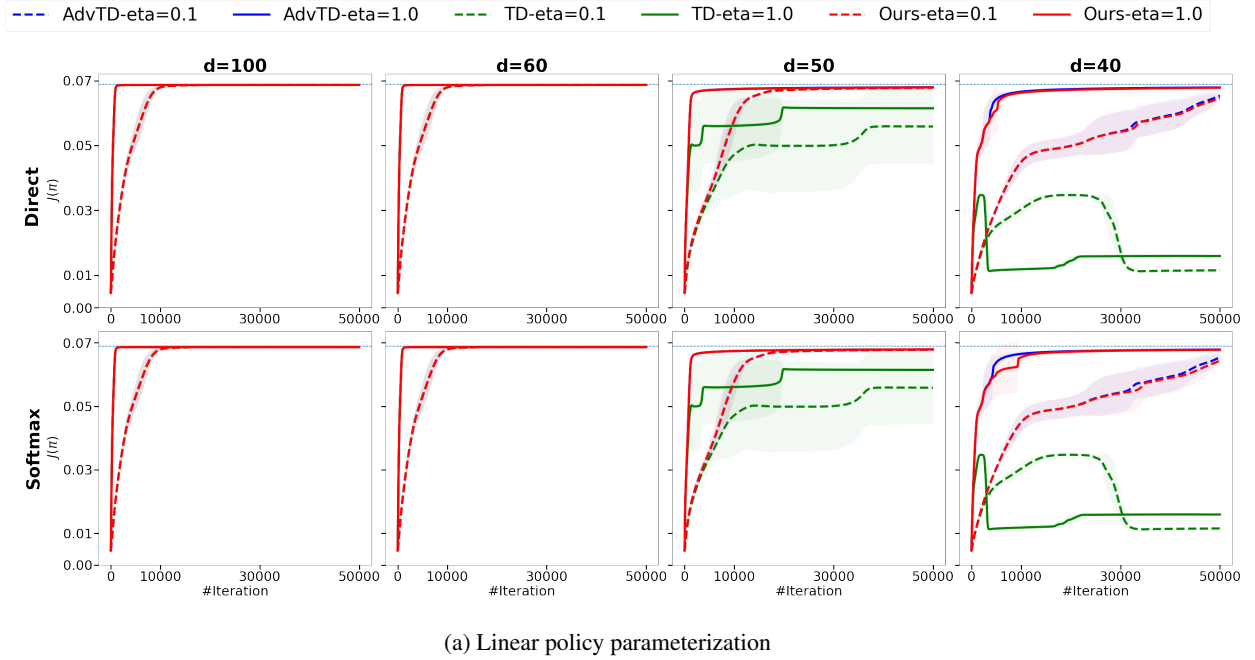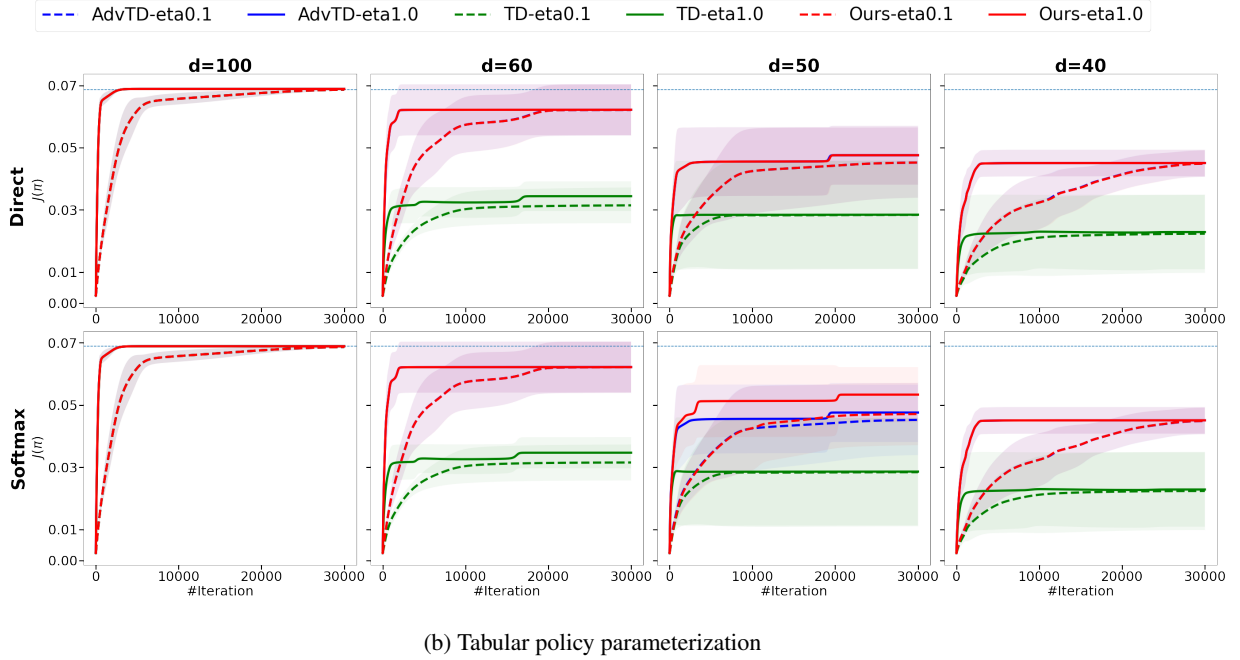

**Figure 5: Frozen Lake – Linear/Tabular actor and Linear critic with exact  $Q$  computation:** Comparison of decision-aware, AdvTD, and TD loss functions using a linear actor Fig. 5a and Fig. 5b coupled with a linear (with four different dimensions) critic in the Frozen Lake environment for direct and softmax policy representations with known MDP. For  $d = 100$  (corresponding to an expressive critic) in both actor parameterizations and  $d = 60$  in linear parameterization, all algorithms have the same performance. In other scenarios, minimizing TD loss functions leads to worse performance than decision-aware and AdvTD loss functions and for  $d = 40$  in linear parameterization TD does not have monotonic improvement. AdvTD and decision-aware almost have a similar performance for all scenarios except  $d = 50$  with tabular actor where decision-aware reaches a better sub-optimal policy.

**Frozen Lake – Linear/Tabular actor and Linear critic with estimated  $Q$ :** For the Frozen Lake environment, when estimating the  $Q$  functions using Monte Carlo sampling (all other choices being the same as in Fig. 5), we found that the variance resulting from Monte Carlo sampling (even with  $\geq 1000$  samples) dominates the bias. As a result, the effect of the critic loss is minimal, and all algorithms result in similar performance.
